# Supplementary material
Source: PubMed Central journal article supplement (PMC4104905)
Supplement: 1405065111_pnas.1405065111.sapp.pdf [file 1405065111_pnas.1405065111.sapp.pdf]

## Supporting Information

### Arenium ions are not obligatory intermediates in electrophilic aromatic substitution

Boris Galabov<sup>a,1</sup>, Gergana Koleva<sup>a</sup>, Svetlana Simova<sup>b</sup>, Boriana Hadjieva<sup>a</sup>, Henry F. Schaefer III<sup>c,1</sup>, Paul von Ragué Schleyer<sup>c,1</sup>

<sup>a</sup>Department of Chemistry and Pharmacy, University of Sofia, Sofia 1164, Bulgaria; <sup>b</sup>Institute of Organic Chemistry with Centre of Phytochemistry, Laboratory Nuclear Magnetic Resonance, Bulgarian Academy of Sciences, Sofia 1113, Bulgaria; and <sup>c</sup>Center for Computational Quantum Chemistry and Department of Chemistry, University of Georgia, Athens, GA 30602.

<sup>1</sup>To whom correspondence should be addressed: galabov@chem.uni-sofia.bg, ccq@uga.edu, schleyer@uga.edu.

#### Table of Contents

|                                                                                                                                                                                                                                                                                                                                                                                                                                                                                                                                                                |            |
|----------------------------------------------------------------------------------------------------------------------------------------------------------------------------------------------------------------------------------------------------------------------------------------------------------------------------------------------------------------------------------------------------------------------------------------------------------------------------------------------------------------------------------------------------------------|------------|
| <b>Details of the Experiments</b>                                                                                                                                                                                                                                                                                                                                                                                                                                                                                                                              | <b>S2</b>  |
| <b>Fig. S1.</b> Computed potential energy surface (PES) for anisole-Cl <sub>2</sub> , catalyzed by HCl, reactions in gas-phase at B3LYP/6-311+G(2d,2p).                                                                                                                                                                                                                                                                                                                                                                                                        | <b>S4</b>  |
| <b>Fig. S2.</b> Computed potential energy surface (PES) for catalyzed by HCl anisole-Cl <sub>2</sub> reactions in simulated CCl <sub>4</sub> solvent at B3LYP/6-311+G(2d,2p).                                                                                                                                                                                                                                                                                                                                                                                  | <b>S4</b>  |
| <b>Fig. S3.</b> Geometries of the transition states, $\pi$ -complexes, <b>P1</b> , <b>P3</b> , <b>P5</b> , <b>P6</b> and <b>P7</b> for HCl-catalyzed anisole-Cl <sub>2</sub> reactions, in simulated CCl <sub>4</sub> solution at B3LYP/6-311+G(2d,2p) (bond lengths in Å, bond angles in degrees). <b>TS3</b> was optimized at B3LYP/6-31+G(d,p). <b>TS7</b> was optimized in isolation (gas-phase) at B3LYP/6-311+G(2d,2p). Cis-trans isomerization, elimination transition states, and adducts leading to m-substituted product formation are not included. | <b>S5</b>  |
| <b>Fig. S4.</b> Structures of <b>4</b> and <b>5</b> by-products formed during the chlorination of anisole in CCl <sub>4</sub> . Geometries of the anisole-Cl <sub>2</sub> addition products for were optimized in simulated CCl <sub>4</sub> solution at B2-PLYP/6-311+G(2d,2p).                                                                                                                                                                                                                                                                               | <b>S7</b>  |
| <b>Fig. S5.</b> Gradual consumption of Cl <sub>2</sub> (via its band at 330 nm) during the reaction with anisole (at 25 °C) in absence of added HCl ( <b>A</b> , initial Cl <sub>2</sub> concentration: 8.10 <sup>-3</sup> mol/l, anisole 5.10 <sup>-2</sup> mol/l) and when HCl is added to the reaction mixture prior to Cl <sub>2</sub> flow ( <b>B</b> , initial Cl <sub>2</sub> concentration: 6.10 <sup>-3</sup> mol/l, anisole 5.10 <sup>-2</sup> mol/l). The spectra registration intervals were 15 minutes for both <b>A</b> and <b>B</b> .           | <b>S7</b>  |
| <b>Fig. S6.</b> <sup>1</sup> H NMR spectrum of mixture 4 from 0 to 7.5 ppm. The positions of the aromatic protons cover a range from 6.6 to 7.4 ppm. The signals for the protons of the addition products were found in the range 4.4 – 5.9 ppm. The signal of the methoxy group appears at 3.4 – 4 ppm. The spectra were recorded at 5 °C.                                                                                                                                                                                                                    | <b>S8</b>  |
| <b>Fig. S7.</b> <sup>1</sup> H NMR spectra of mixtures 1 and 4. For mixture 1 the <sup>1</sup> H NMR spectrum was recorded at 25 °C. For mixture 4 the <sup>1</sup> H NMR spectrum was recorded at 5 °C.                                                                                                                                                                                                                                                                                                                                                       | <b>S8</b>  |
| <b>Fig. S8.</b> <sup>13</sup> C NMR spectrum of mixture 4. The spectrum was recorded at 5 °C.                                                                                                                                                                                                                                                                                                                                                                                                                                                                  | <b>S9</b>  |
| <b>Fig. S9.</b> Double quantum filtered <sup>1</sup> H- <sup>1</sup> H COSY of mixture 4. The spectrum was recorded at 5 °C.                                                                                                                                                                                                                                                                                                                                                                                                                                   | <b>S9</b>  |
| <b>Fig. S10.</b> 2D-Heteronuclear <sup>1</sup> H- <sup>13</sup> C HSQC of mixture 4. The spectrum was recorded at 5 °C.                                                                                                                                                                                                                                                                                                                                                                                                                                        | <b>S10</b> |
| <b>Fig. S11.</b> 2D-Heteronuclear <sup>1</sup> H- <sup>13</sup> C HSQC of mixture 3 – expansion of the region for the addition products. The spectrum was recorded at 25 °C.                                                                                                                                                                                                                                                                                                                                                                                   | <b>S10</b> |
| <b>Fig. S12.</b> Region from 4 to 6 ppm of a) 1D TOCSY spectrum for addition product <b>4</b> and b) <b>5</b> and c) <sup>1</sup> H NMR spectrum.                                                                                                                                                                                                                                                                                                                                                                                                              | <b>S11</b> |
| <b>Fig. S13.</b> <sup>1</sup> H NMR spectra of anisole chlorination at -10 °C in the 4 – 6 ppm range.                                                                                                                                                                                                                                                                                                                                                                                                                                                          | <b>S11</b> |
| <b>Fig. S14.</b> <sup>1</sup> H NMR spectra of aromatic region of experiment conducted in -10 °C in the range 6.4 – 7.6 ppm.                                                                                                                                                                                                                                                                                                                                                                                                                                   | <b>S12</b> |
| <b>Fig. S15.</b> Experimental <sup>1</sup> H NMR spectrum in the range 4.5 – 6.5 ppm with maximum quantity of the doublet at 5.18 ppm. The spectrum was recorded at -10 °C.                                                                                                                                                                                                                                                                                                                                                                                    | <b>S12</b> |
| <b>Fig. S16.</b> Structures of <b>4</b> , <b>4 (2)</b> and <b>4 (3)</b> in simulated CCl <sub>4</sub> solution at B2-PLYP/6-311+G(2d,2p).                                                                                                                                                                                                                                                                                                                                                                                                                      | <b>S13</b> |
| <b>Table S1.</b> The <sup>1</sup> H and <sup>13</sup> C NMR chemical shifts and coupling data for the compounds <b>4</b> and <b>5</b> .                                                                                                                                                                                                                                                                                                                                                                                                                        | <b>S13</b> |
| <b>Table S2.</b> Dihedral angles ( $\varphi$ ), a MMFF94 energies given by SPARTAN'08 (E, kcal/mol) of representative conformers for several diastereoisomers with different relative configuration, compared with the experimental and theoretically determined data for compound <b>5</b> .                                                                                                                                                                                                                                                                  | <b>S14</b> |
| <b>Fig. S17.</b> Structure of a representative set of diastereoisomers of <b>5</b> with different relative configuration.                                                                                                                                                                                                                                                                                                                                                                                                                                      | <b>S14</b> |
| <b>Table S3.</b> Dihedral angles ( $\varphi$ , in degrees) and energies (B2PLYP/6-311+G(2d,2p)) of <b>4</b> and its configurational                                                                                                                                                                                                                                                                                                                                                                                                                            | <b>S15</b> |

|                                                                                                                                                                                                                                                                                                                                          |            |
|------------------------------------------------------------------------------------------------------------------------------------------------------------------------------------------------------------------------------------------------------------------------------------------------------------------------------------------|------------|
| isomers <b>4(2)</b> and <b>4(3)</b> .                                                                                                                                                                                                                                                                                                    |            |
| <b>Table S4.</b> Electronic ( $E_{el}$ ), thermal correction to Gibbs Free Energy, ZPE, and $E_{disp}$ Energies as well as NImag of species involved in the catalyzed by HCl anisole-Cl <sub>2</sub> reaction in the gas phase, computed at RB3LYP/6-311+G(2d,2p) with stable wavefunction, no diradical character.                      | <b>S15</b> |
| <b>Table S5.</b> Electronic ( $E_{el}$ ), thermal correction to Gibbs Free Energy, ZPE, and $E_{disp}$ Energies as well as NImag of species involved in the catalyzed by HCl anisole-Cl <sub>2</sub> reaction in simulated CCl <sub>4</sub> solvent, computed at RB3LYP/6-311+G(2d,2p) with stable wavefunction, no diradical character. | <b>S16</b> |
| <b>Table S6.</b> Electronic ( $E_{el}$ ), ZPE, $E_{disp}$ , thermal correction to Gibbs Free Energy energies as well as NImag of species involved in the catalyzed by HCl anisole-Cl <sub>2</sub> reaction in simulated CCl <sub>4</sub> solvent, computed at PBEPBE/6-311+G(2d,2p) with stable wavefunction, no diradical character.    | <b>S17</b> |
| <b>Table S7.</b> Electronic ( $E_{el}$ ) energies of species involved in the catalyzed by HCl anisole-Cl <sub>2</sub> reactions in isolation (gas phase) and in simulated CCl <sub>4</sub> solvent, computed at RB2-PLYP/6-311+G(2d,2p)//RB3LYP/6-311+G(2d,2p).                                                                          | <b>S18</b> |
| <b>Table S8.</b> Cartesian coordinates species involved in HCl-catalyzed anisole-Cl <sub>2</sub> reactions in isolation (gas-phase) at RB3LYP/6-311+G(2d,2p). The energy data for these structures are shown in Table S4.                                                                                                                | <b>S19</b> |
| <b>Table S9.</b> Cartesian coordinates of species involved in catalyzed by HCl anisole-Cl <sub>2</sub> reactions in simulated CCl <sub>4</sub> solvent at RB3LYP/6-311+G(2d,2p). The energy data for these structures are shown in Table S5.                                                                                             | <b>S23</b> |
| <b>Table S10.</b> Cartesian coordinates of species involved in catalyzed by HCl anisole-Cl <sub>2</sub> reactions in simulated CCl <sub>4</sub> solvent at PBEPBE/6-311+G(2d,2p). The energy data for these structures are shown in Table S6.                                                                                            | <b>S27</b> |
| <b>Supporting References</b>                                                                                                                                                                                                                                                                                                             | <b>S31</b> |

### Details of the Experiments

A number of experiments were conducted aimed at finding support for the principal conclusions from the theoretical studies on the mechanism and energetic of the anisole chlorination.

The course of the reaction was followed by recording spectra of the reaction mixture at various intervals. Two types of spectroscopic techniques were employed in analyzing the samples. FTIR spectra (Shimadzu FTIR 8400S) were recorded at 5 min intervals. The infrared technique proved, however, not sensitive enough and did not provide conclusive results with respect small amounts of side products besides the principal reaction products, which are *para*-chloroanisole and *ortho*-chloroanisole. Thus, NMR spectroscopy became the principal analytical technique in studying the chlorination process. <sup>1</sup>H (600.13 MHz) and <sup>13</sup>C (150.92 MHz) spectra were acquired on an AVANCE AV600 II+ NMR spectrometer. The spectra were recorded in CCl<sub>4</sub> at different temperatures with TMS as an internal standard for the <sup>1</sup>H and <sup>13</sup>C spectra. Unambiguous assignment of the signals was made on the basis of 1D and 2D gradient enhanced versions of COSY, TOCSY, NOESY, HSQC and HMBC experiments (Bruker pulse library programs: selno, selml, cosygpmf, dipsi2etgpsi, hsqcedetgpsisp2.2, and hmbcplpndqf were applied). The programs of ACD/Labs (1), release 12, for predicting chemical shifts and the online tool of R. Stenutz (2) for the generalized <sup>3</sup>J<sub>HH</sub> Karplus equation (3) for the J-couplings were employed.

**Chlorination of anisole with chlorine at 25 °C.** Anisole was dissolved in carbon tetrachloride at 25 °C in order to prepare solution with 1 mol/l concentration, while chlorine gas was introduced for 30 min.

**Chlorination of anisole with chlorine at 5 °C.** Chlorine gas was dissolved in carbon tetrachloride at 5 °C. Anisole was added in order to prepare a solution with 1 mol/l concentration (5 °C).

**Chlorination of anisole with chlorine at -10 °C.** Cl<sub>2</sub> and anisole were mixed in CCl<sub>4</sub> solvent at low temperature (-30 °C), the reaction is then followed by proton NMR spectroscopy. A series of NMR spectra were acquired at -10 °C. The reaction was followed for a period of 5 hours.

The identification and assignment of the *ortho* (**2**) and *para* (**3**) substitution products were trivial, despite their moderate (up to 0.15 ppm) chemical shift dependence on concentration. The proton chemical shifts, measured in mixture 4, are depicted in Scheme S1.

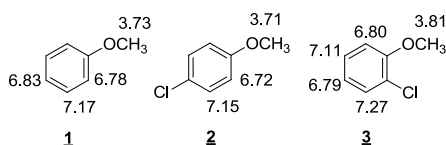

**Scheme S1.** Proton chemical shifts for the principal products of anisole chlorination of in CCl<sub>4</sub> at 25 °C (reaction mixture 4, see Table 2 in the main text).

The stereochemistry of addition products **4** and **5** was unambiguously determined through detailed inspection of molecular models and comparison of predicted and experimental vicinal coupling constants and the corresponding to these constants dihedral angles. The experimental vicinal spin-spin coupling constants (H2-H3, 3.3Hz), (H3-H4, 9.0 Hz) and (H5-H6, 4.0 Hz) in **4** and (H2-H3, 5.1Hz), (H4-H5, 2Hz) and (H5-H6, 8.9Hz) in **5**, extracted from the proton NMR spectra correspond to dihedral angles 51, 159 and 39 for **4**, and 38, 63 and 158 for **5**. These values correlate quite well with the dihedral angles in the structures, depicted in Fig. S4, 68, 160 and 51 for **4** and 39, 66 and 159 - for **5**, respectively.

**Brief explanation to the structure elucidation of compounds 4 and 5:**

The experimental  $^1\text{H}$  and  $^{13}\text{C}$  NMR chemical shifts and coupling constants for compounds **4** and **5** are given in Table S1. They correspond well to the values, predicted by the ACD/Labs (1) program.

Unambiguous assignments of the signals were based on 1D and/or 2D gradient-enhanced versions of COSY, TOCSY, NOESY, HSQC, and HMBC experiments. The following observed signal connectivity's support unambiguous constitution of **4** and **5**, respectively:

**2D DQFCOSY:** Direct proton coupling partners were identified as follows: 4.41 (H-6, **5**):4.63 (H-5, **5**); 4.44 (H-6, **4**):4.5 (H-4,5, **4**); 4.5 (H-4,5, **4**):4.76 (H-3, **4**); 4.63 (H-5, **5**): 5.81 (H-3, **5**); 4.63 (H-2, **5**):5.84 (H-3, **5**); 4.76 (H-3, **4**):4.81 (H-2, **4**); 4.79 (H-2, **5**):5.84 (H-3, **5**); 5.81 (H-4, **5**):5.84(H-3, **5**) in full compliance with the coupling constants, extracted from the  $^1\text{H}$  NMR spectra.

**1D and 2D TOCSY:** Detected connected spin systems constitute 4.81 (H-2, **4**)  $\leftrightarrow$  4.76 (H-3, **4**)  $\leftrightarrow$  4.5 (H-4,5, **4**)  $\leftrightarrow$  4.44 (H-6, **4**) for **4** and 4.79 (H-2, **5**) $\leftrightarrow$ 5.82 (H-3,4, **5**) $\leftrightarrow$ 4.63 (H-5, **5**)  $\leftrightarrow$  4.41 (H-6, **5**) for **5**, determined from several selective experiments with variable mixing time from 20 to 150 ms, in line with 2D dipsi experiment with mixing time of 150 ms.

**HSQC:** Observed direct heteronuclear (proton:carbon) correlation for the methoxy group in **4** is 3.60:55.06. Further detected correlations in **4** involve 4.76(H-3):56.41(C-3), 4.81(H-2):98.72(C-2) and 4.41(H-6):59.96(C-6). Correlations, detected in **5** include 3.54:50.67 for the methoxy couple, 4.41(H-6):64.06(C-6), 4.63(H-5):60.07(C-5), 4.79(H-2):55.57(C-2), 5.81(H-4):129.76(C-4) and 5.84(H-3):124.62(C-3).

**HMBC:** Surely detected are the following long-range connectivity's, that are in line with the structures elucidated and the assignments made: 3.54(CH<sub>3</sub>O, **5**):104.13(C-6, **5**); 3.60 (CH<sub>3</sub>O, **4**):151.29(C-1, **4**); 4.41 (H-6, **5**):60.07(C-5, **5**); 4.63(H-5, **5**):64.04(C-6, **5**); 4.63(H-5, **5**):124.62(C-3, **5**); 4.63(H-5, **5**):129.76(C-4, **5**); 4.79(H-2, **5**):104.13(C-6, **5**); 4.79(H-2, **5**):124.62(C-3, **5**); 4.79(H-2, **5**):129.76(C-4, **5**); 4.81(H-2, **4**):56.41(C-3, **4**); 5.81(H-4, **5**):64.06(C-6, **5**); 5.81(H-4, **5**):55.57(C-2, **5**); 5.84(H-4, **5**):60.07(C-5, **5**); 5.84(H-3, **5**):104.13(C-1, **5**).

The experimental proton and carbon chemical shifts correspond well to those calculated with the ACD chemical shift prediction program, based on empirically-determined additive increments (Table S1).

The relative configurations of the individual carbon atoms in **4** and **5** are determined using the available vicinal proton spin-spin coupling constants and the observed NOE enhancements. The experimental data allow unambiguous configuration assessment only for **5**. Representative calculation of the dihedral angles and energy in isomers with different relative configurations (Fig. S17) of the aliphatic carbon atoms in **5** is presented in Table S2. Only two isomers, which differ in the relative configuration of C-1 and have analogous structure of the remaining chain, agree with the spin coupling data. The C-1 configuration in the addition product **5** is assigned from the NOE data to have an equatorial methoxy group and an axial chlorine atom. The alternative configuration with an axial methoxy substituent should give rise to NOE not only to the H-2 and H-6 neighboring atoms, but also a relatively strong enhancement of H-5, that is not observed.

**1D NOESY:** Selective excitation of the methoxyl signal at 3.60 ppm leads to the following NOE features in **4**: 2.24% enhancement of the signal at 4.81 (H-2, **4**); 0.11% - at 4.76 (H-3, **4**) and 0.06% at 4.44 (H-6, **4**) ppm. Selective excitation of the methoxyl signal at 3.54 in **5** leads to 0.73% enhancements at 4.79 (H-2, **5**) and 0.05% at 4.41 (H-6, **5**) ppm.

Determination of the relative configuration of all carbon atoms in **4** is not possible from the available experimental data due to lack of the vicinal H-4-H-5 coupling constant value.  $^3J_{45}$  could not be extracted from the spectra because the close chemical shift values of H-4 and H-5 give rise to a second order spin system, located in a spectral region with severe overlapping. The small value (4.0 Hz) of  $^3J_{45}$  testifies for non-antiplanar conformation of protons 4 and 5. Thus, three possible diastereomers could not be distinguished on the basis of the experimental data. The axial H-3 and the antiperiplanar disposition of the vicinal H-4 are unambiguously deduced from the values of the coupling constants  $^3J_{23}$  and  $^3J_{34}$ . Thus, a tentative assignment of the

stereochemistry of **4** also is based on their computed energies. The structure of **4** shown in Fig. S4 has the lowest B2PLYP+D3/6-311+G(2d,2p) energy of the three possible diastereomers. The structures of these isomers and their computed energies are shown in Fig. S16 and Table S3.

Further NMR experiments were conducted at 5 °C and at -10 °C following the same procedure. The latter were more revealing. CCl<sub>4</sub> solutions of Cl<sub>2</sub> and of anisole were mixed at -30 °C and the reaction was followed for 5 hours at -10 °C. Representative NMR spectra of the reaction mixture taken at 5', 15', 1h, 2h, 3h, 4h, and 5h after the start of the reaction, when no appreciable remaining quantity of anisole could be detected are compared in Figs. S13 and S14. After one hour reaction time, appreciable amounts of compounds **2**, **3**, **4** and **5**, are detected as main components at room temperature, their quantity further increases with time. A number of additional products also are detected in smaller amounts, some of them forming and disappearing during the reaction. No unambiguous proof for the presence of an addition product of one molecular chlorine to anisole could be obtained, but cannot be excluded. A small doublet signal around 5.2 ppm (*J* = 6.9Hz) was detected in the reaction mixture 10 minutes after the start of the reaction (at -10 °C), its maximum quantity was 30 minutes, but it fully disappeared in 4 hours. The signal at 5.2 ppm could correspond to the olefinic proton *ortho* to the methoxy group in structure **6** (Fig. S15). All other protons in this structure have lower intensities because of the splitting and could not be detected unambiguously due to overlap with other signals.

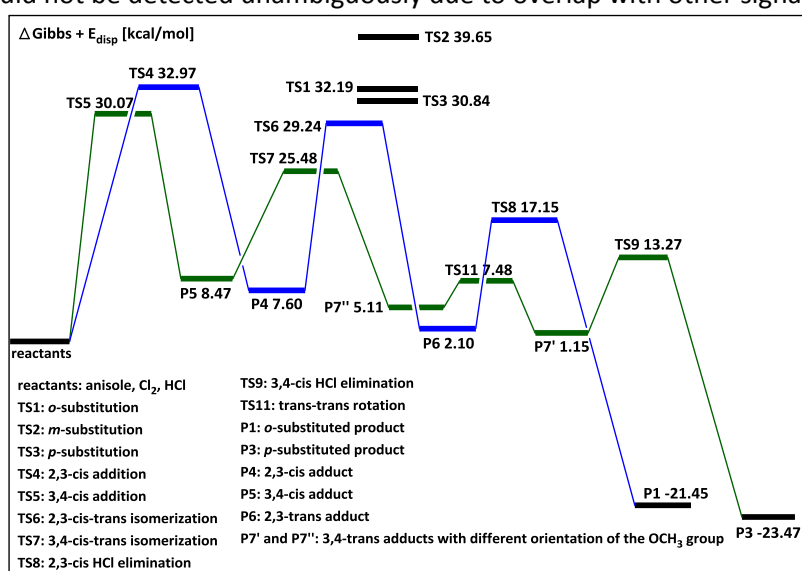

**Fig. S1.** Computed potential energy surface (PES) for anisole-Cl<sub>2</sub>, catalyzed by HCl, reactions in isolation (gas-phase) at B3LYP/6-311+G(2d,2p).

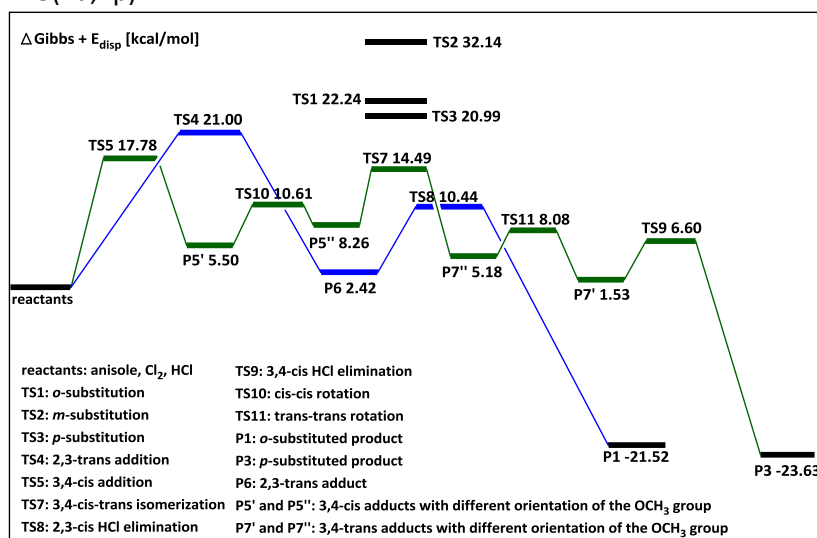

**Fig. S2.** Computed potential energy surface (PES) for catalyzed by HCl anisole-Cl<sub>2</sub> reactions in simulated CCl<sub>4</sub> solvent at B3LYP/6-311+G(2d,2p).

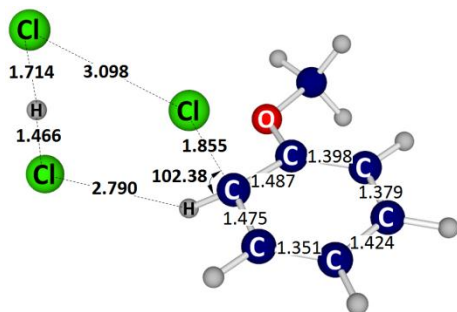

***o*-substitution TS1 (99.3 *i*)**

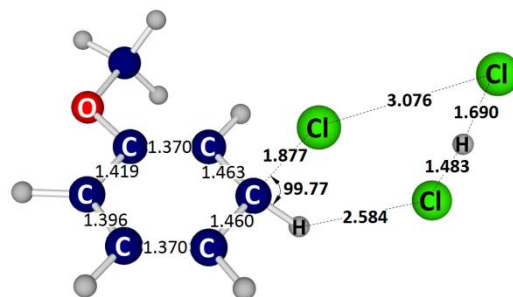

***m*-substitution TS2 (215.8 *i*)**

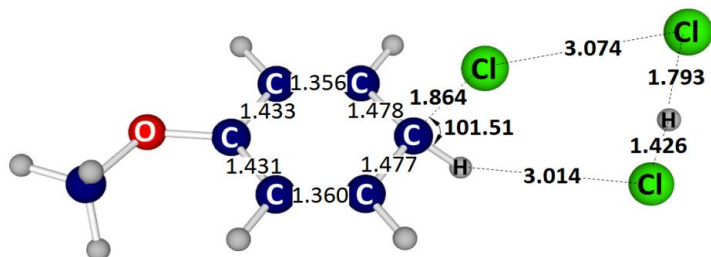

***p*-substitution TS3 (59.2 *i*)**

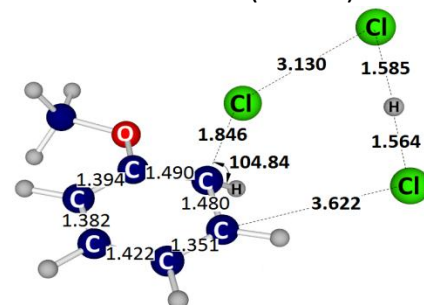

**2,3-trans addition TS4 (299.4 *i*)**

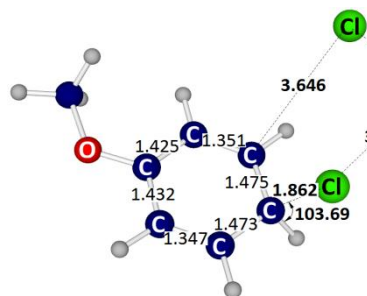

**3,4-cis addition TS5 (119.3 *i*)**

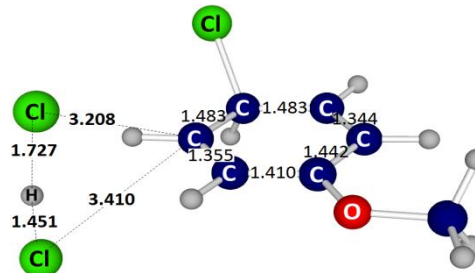

**3,4-cis-trans isomerization TS7 (52.6 *i*)**

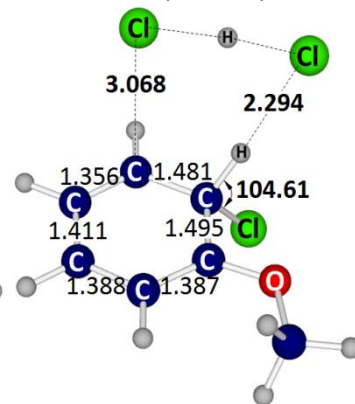

**2,3-cis elimination TS8 (147.4 *i*)**

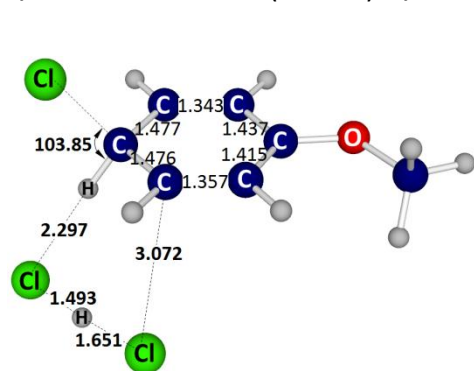

**3,4-cis elimination TS9 (82.9 *i*)**

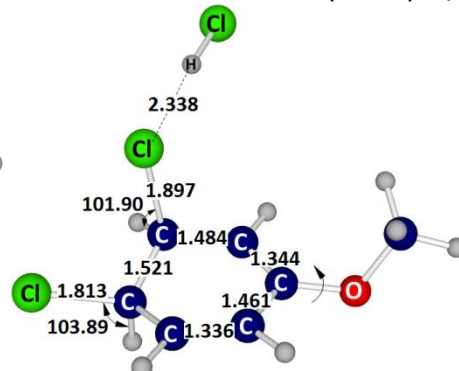

**cis-cis rotation TS10 (70.1 *i*)**

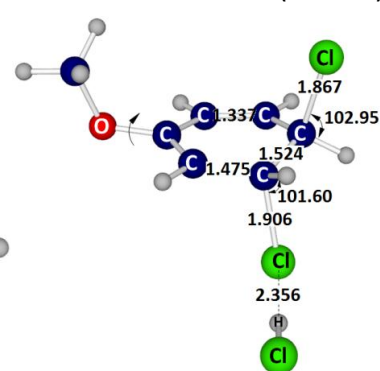

**trans-trans rotation TS11 (95.1 *i*)**

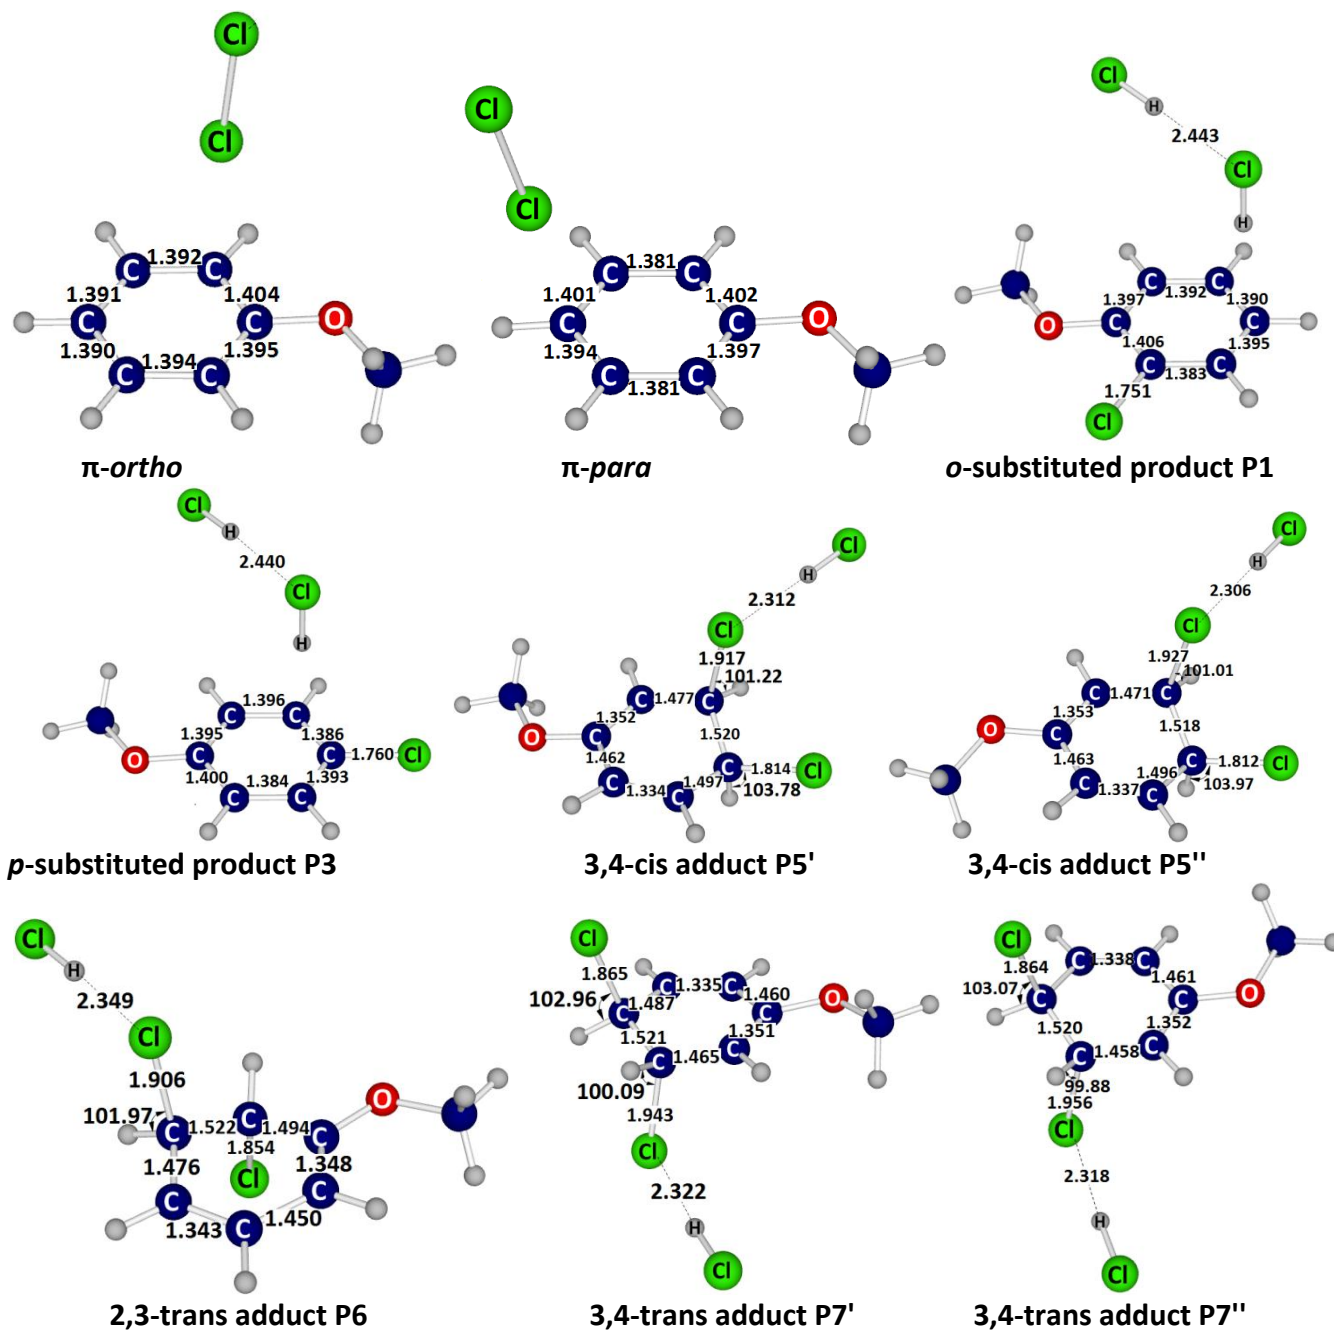

**Fig. S3.** Geometries of the transition states,  $\pi$ -complexes, P1, P3, P5, P6 and P7 for HCl-catalyzed anisole-Cl<sub>2</sub> reactions, in simulated CCl<sub>4</sub> solution at B3LYP/6-311+G(2d,2p) (bond lengths in Å, bond angles in degrees). TS3 was optimized at B3LYP/6-31+G(d,p). TS7 was optimized in isolation (gas-phase) at B3LYP/6-311+G(2d,2p). Cis-trans isomerization, elimination transition states, and adducts leading to *m*-substituted product formation are not included.

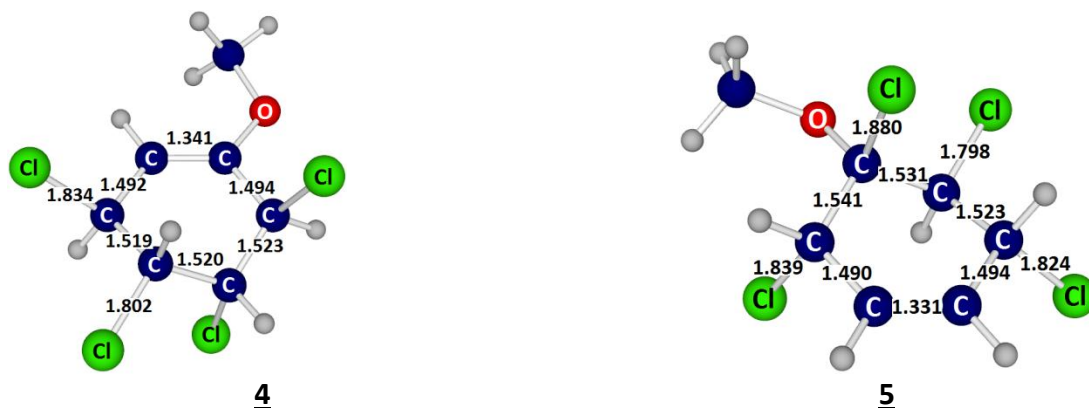

**Fig. S4.** Structures of **4** and **5** by-products formed during the chlorination of anisole in  $\text{CCl}_4$ . Geometries of the anisole- $\text{Cl}_2$  addition products for were optimized in simulated  $\text{CCl}_4$  solution at B2-PLYP/6-311+G(2d,2p).

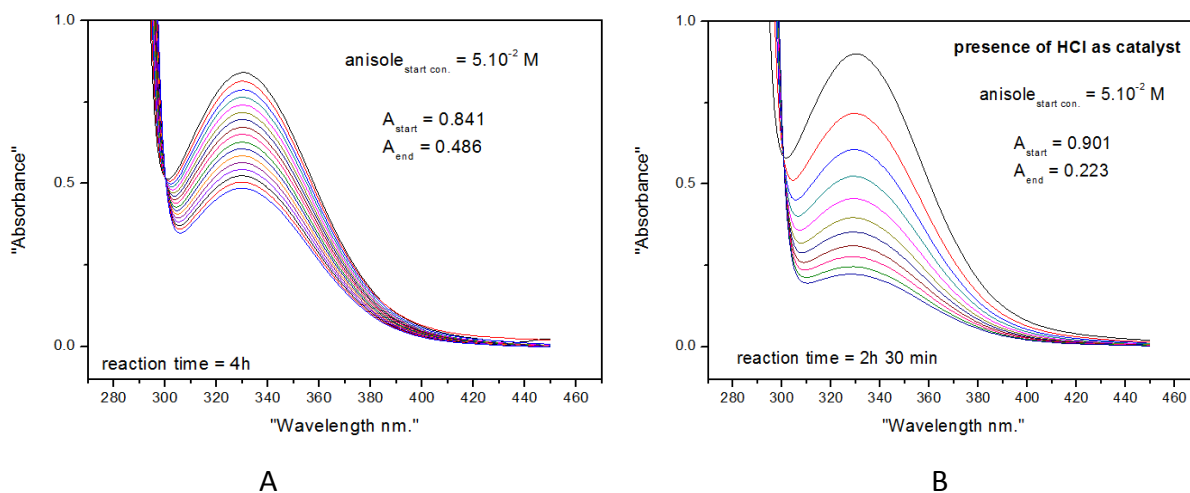

**Fig. S5.** Gradual consumption of  $\text{Cl}_2$  (via its band at 330 nm) during the reaction with anisole (at 25 °C) in absence of added HCl (A, initial  $\text{Cl}_2$  concentration:  $8 \cdot 10^{-3}$  mol/l, anisole  $5 \cdot 10^{-2}$  mol/l) and when HCl is added to the reaction mixture prior to  $\text{Cl}_2$  flow (B, initial  $\text{Cl}_2$  concentration:  $6 \cdot 10^{-3}$  mol/l, anisole  $5 \cdot 10^{-2}$  mol/l). The spectra registration intervals were 15 minutes for both A and B.

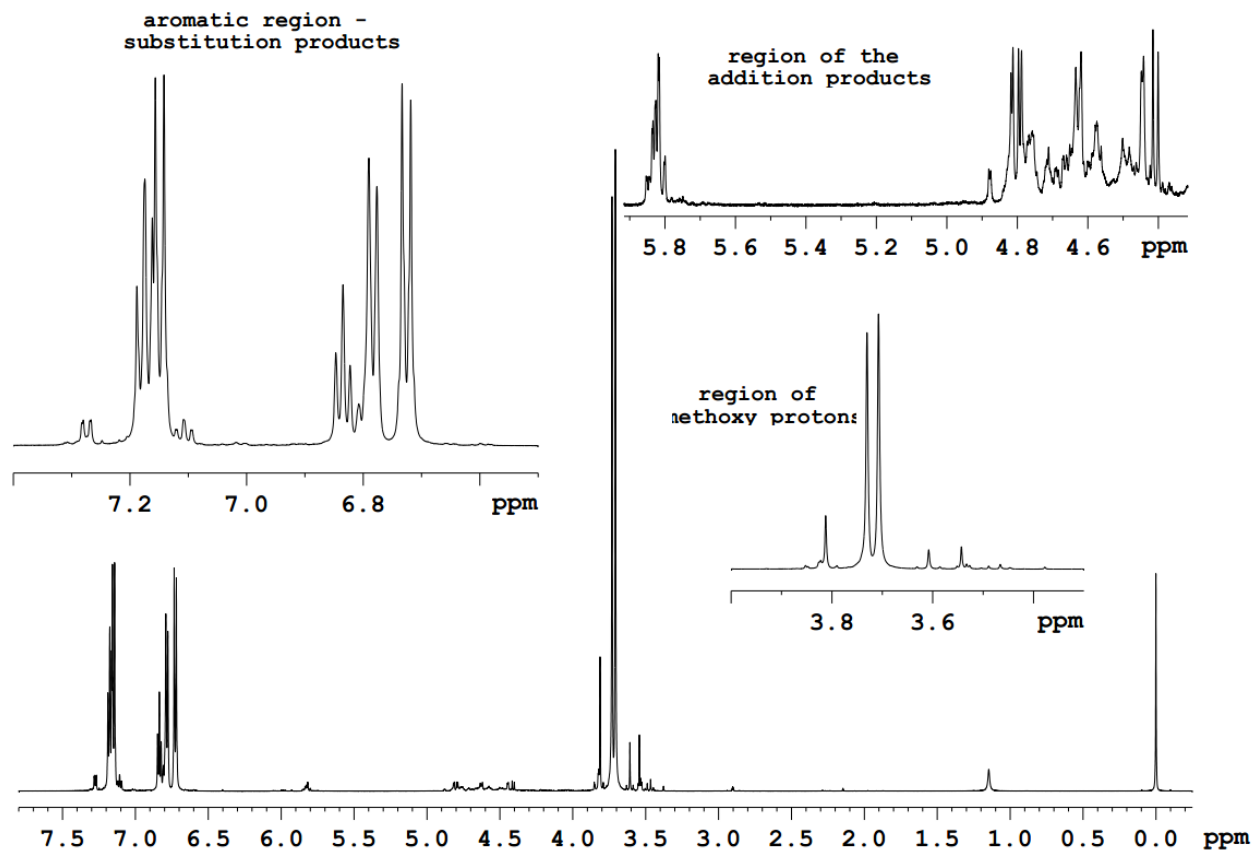

**Fig. S6.**  $^1\text{H}$  NMR spectrum of mixture 4 from 0 to 7.5 ppm. The positions of the aromatic protons cover a range from 6.6 to 7.4 ppm. The signals for the protons of the addition products were found in the range 4.4 – 5.9 ppm. The signal of the methoxy group appears at 3.4 – 4 ppm. The spectra were recorded at 5 °C.

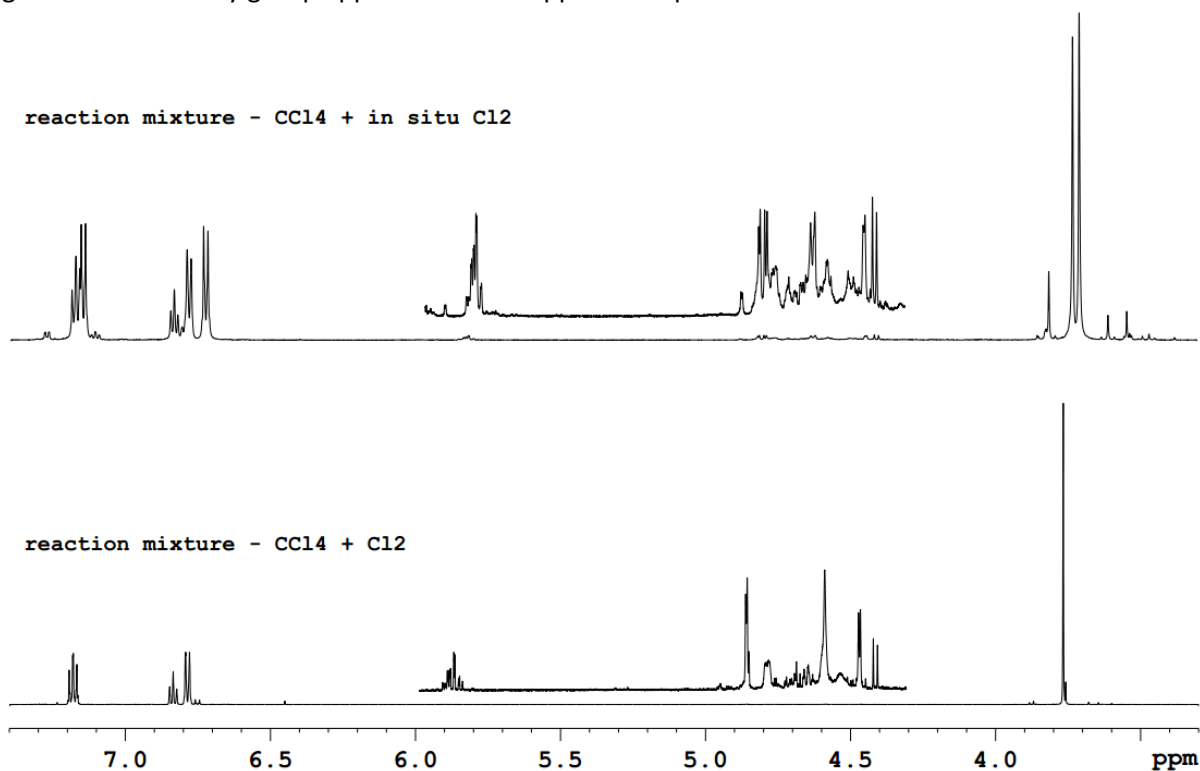

**Fig. S7.**  $^1\text{H}$  NMR spectra of mixtures 1 and 4. For mixture 1 the  $^1\text{H}$  NMR spectrum was recorded at 25 °C. For mixture 4 the  $^1\text{H}$  NMR spectrum was recorded at 5 °C.



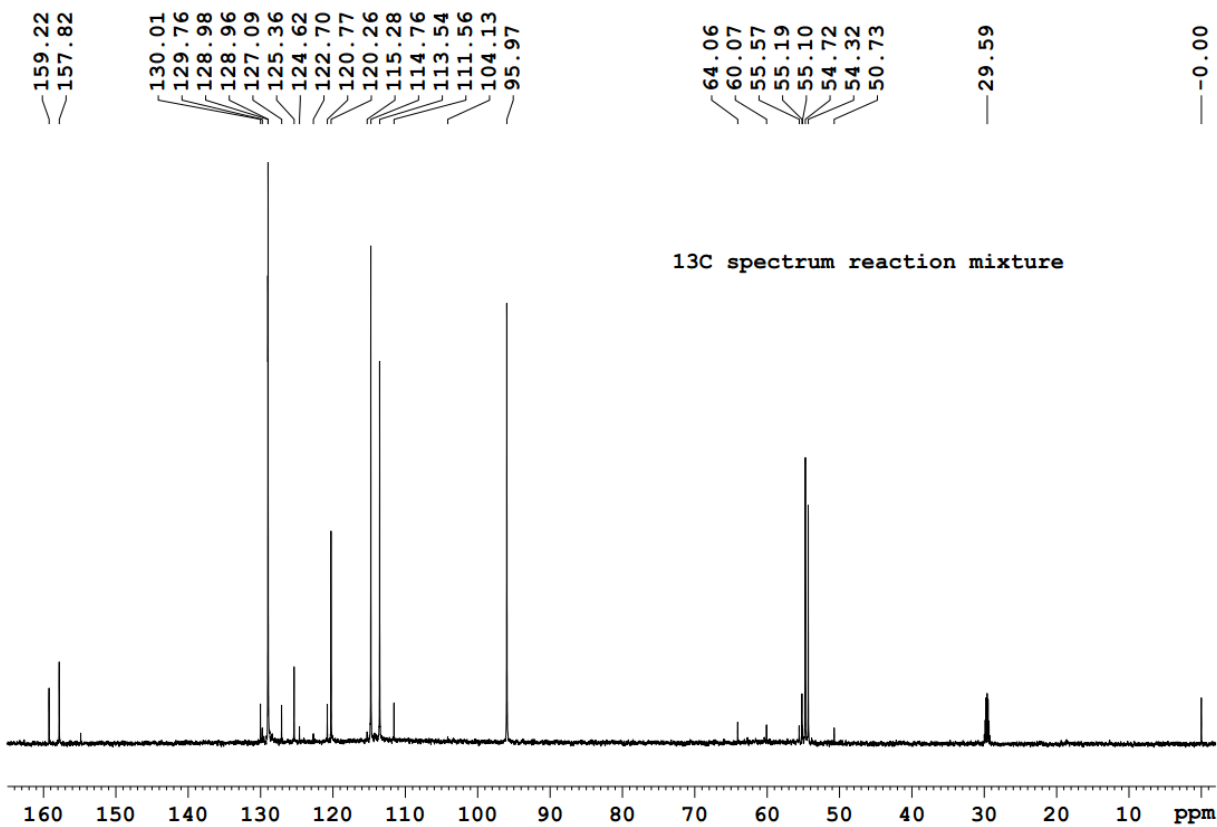

Fig. S8.  $^{13}\text{C}$  NMR spectrum of mixture 4. The spectrum was recorded at 5 °C.

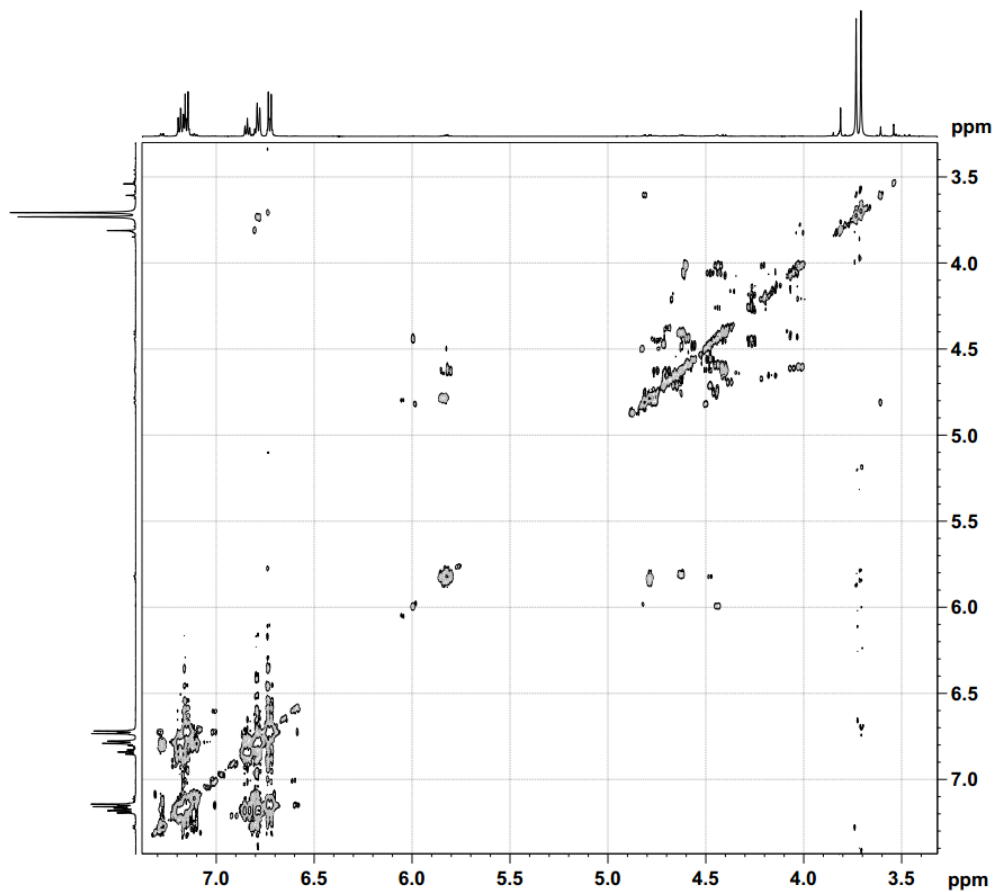

Fig. S9. Double quantum filtered  $^1\text{H}$ - $^1\text{H}$  COSY of mixture 4. The spectrum was recorded at 5 °C.

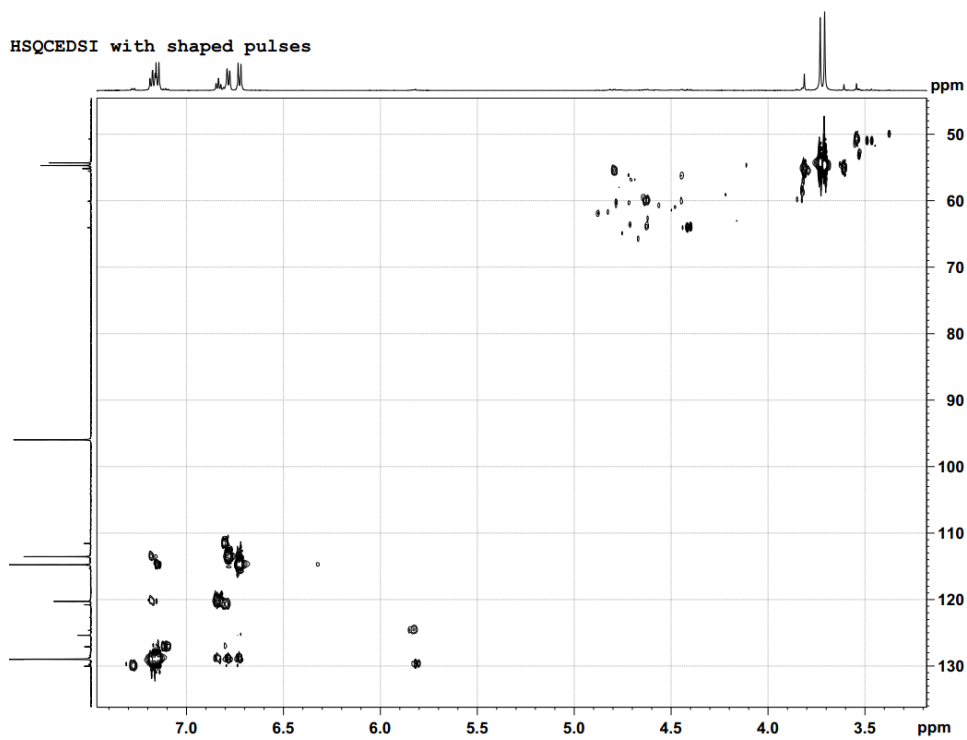

**Fig. S10.** 2D-Heteronuclear  $^1\text{H}$ - $^{13}\text{C}$  HSQC of mixture 4. The spectrum was recorded at 5 °C.

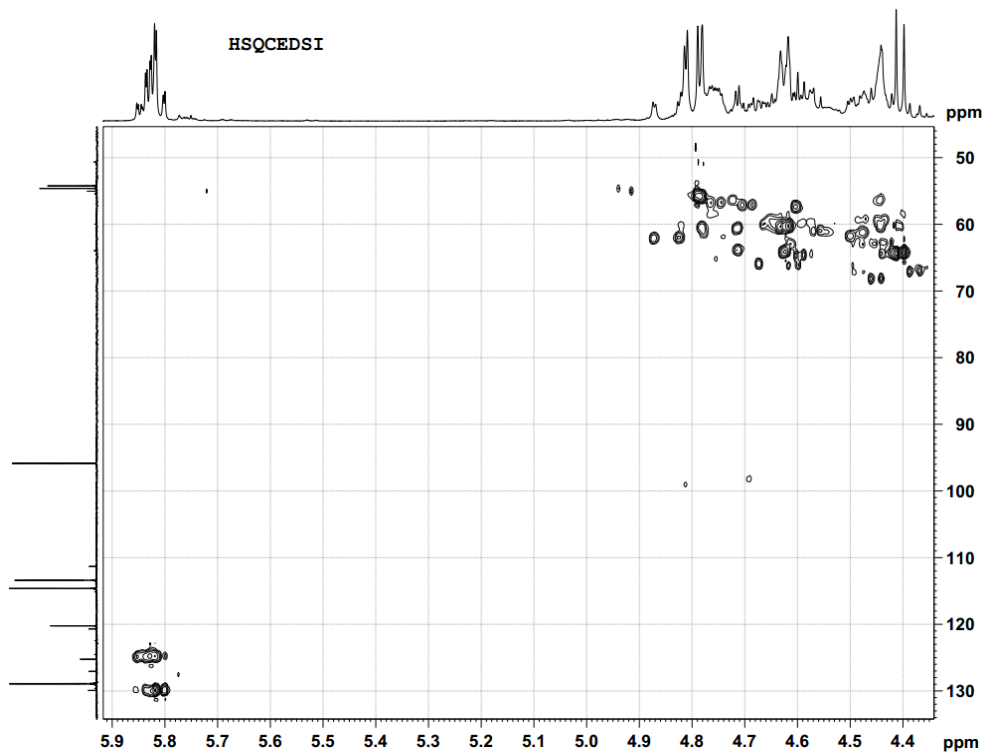

**Fig. S11.** 2D-Heteronuclear  $^1\text{H}$ - $^{13}\text{C}$  HSQC of mixture 3 – expansion of the region for the addition products. The spectrum was recorded at 25 °C.

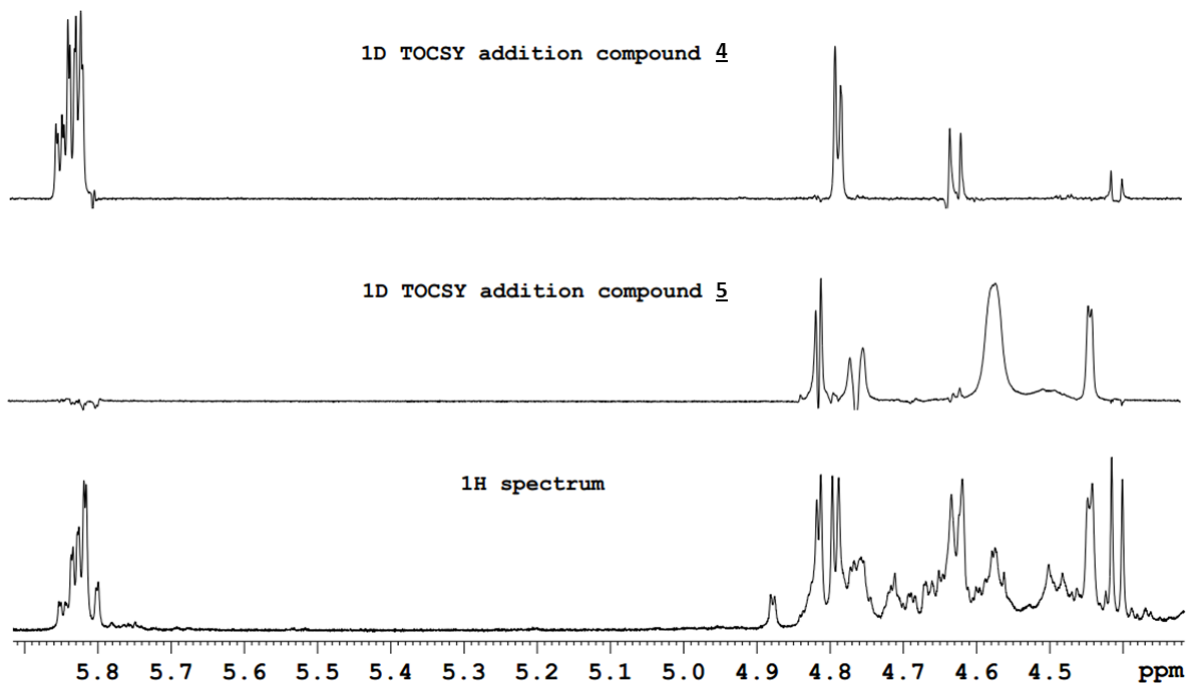

**Fig. S12.** Region from 4 to 6 ppm of a) 1D TOCSY spectrum for addition product 4 and b) 5 and c)  $^1\text{H}$  NMR spectrum.

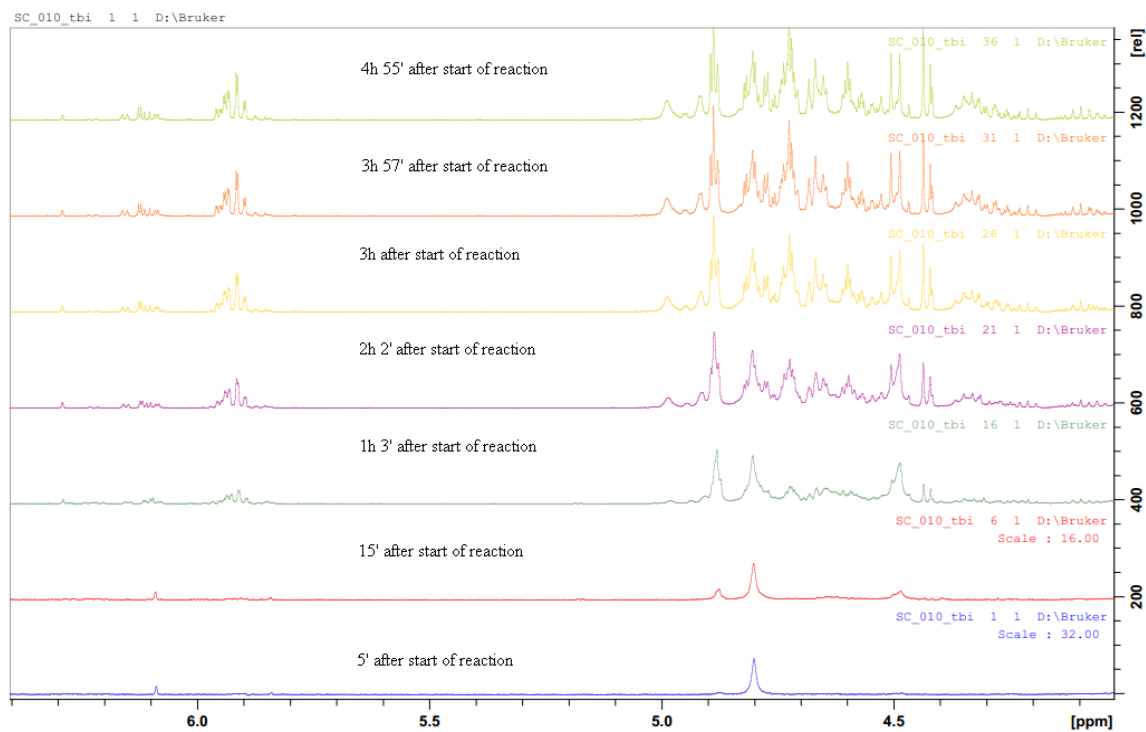

**Fig. S13.**  $^1\text{H}$  NMR spectra of anisole chlorination at  $-10\text{ }^\circ\text{C}$  in the 4 – 6 ppm range. The initial concentration of anisole was 1.5 mol/l.

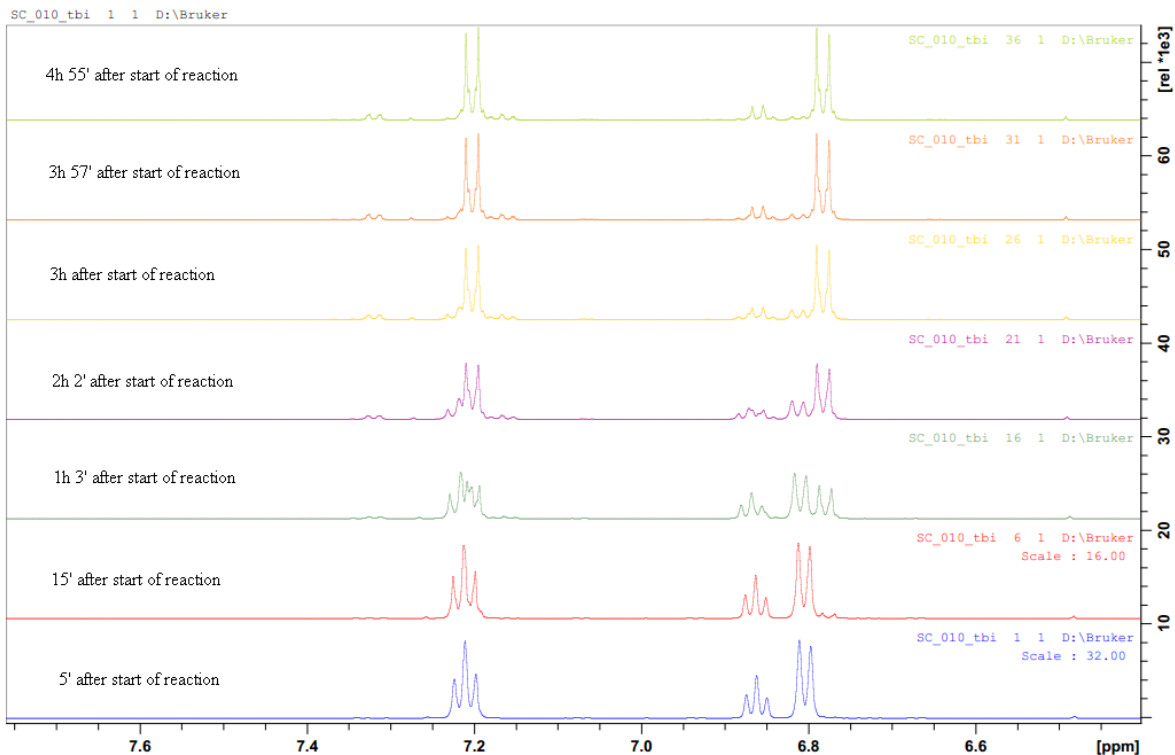

**Fig. S14.**  $^1\text{H}$  NMR spectra of aromatic region of experiment conducted in  $-10\text{ }^\circ\text{C}$  in the range 6.4 – 7.6 ppm. The initial concentration of anisole is 1.5 mol/l.

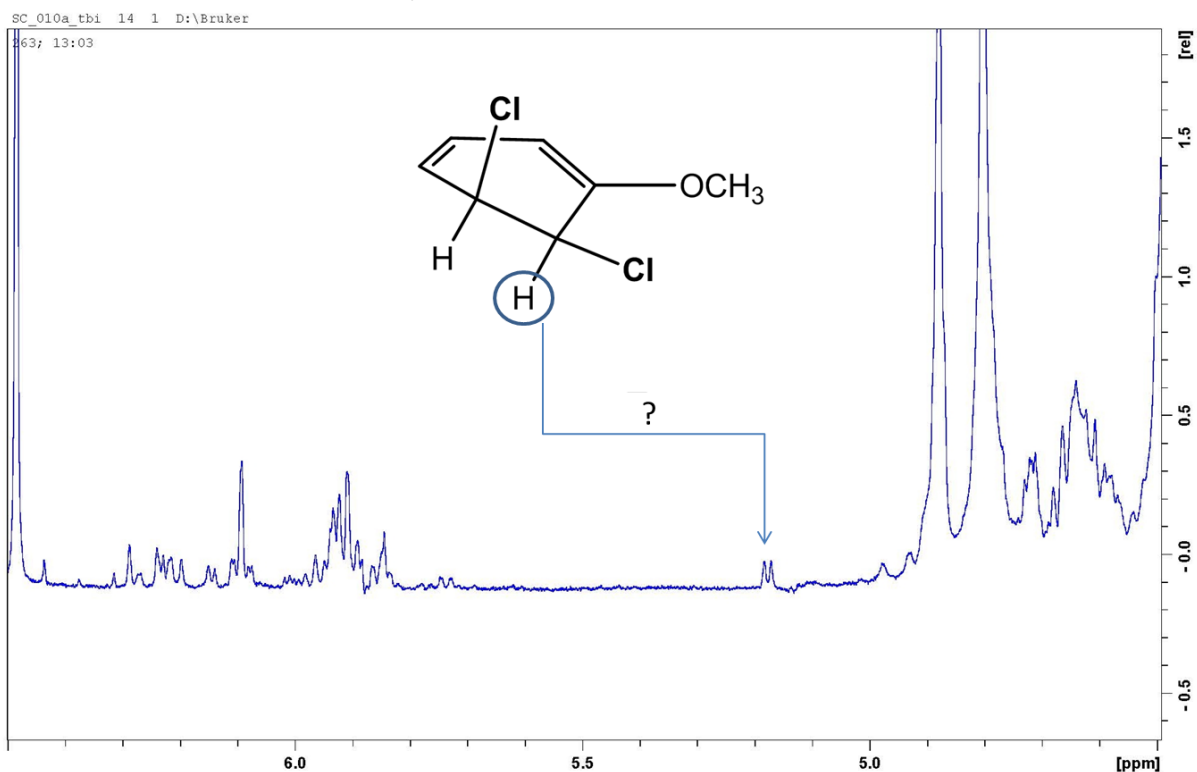

**Fig. S15.** Experimental  $^1\text{H}$  NMR spectrum in the range 4.5 – 6.5 ppm with maximum quantity of the doublet at 5.18 ppm. The spectrum was recorded at  $-10\text{ }^\circ\text{C}$ .

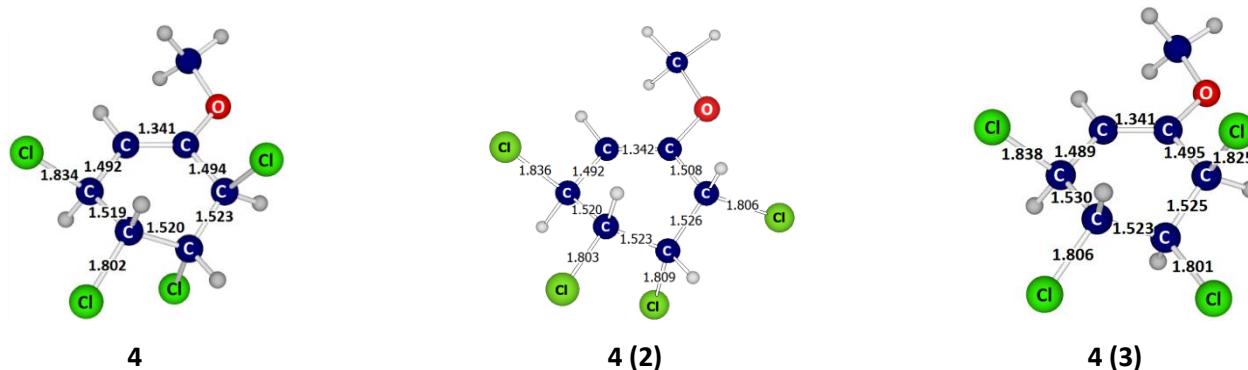

Fig. S16. Structures of **4**, **4 (2)** and **4 (3)** in simulated CCl<sub>4</sub> solution at B2-PLYP/6-311+G(2d,2p).

Table S1. <sup>1</sup>H and <sup>13</sup>C NMR chemical shifts and coupling data for compounds **4** and **5**.

|                         | <sup>1</sup> H and <sup>13</sup> C NMR chemical shifts and coupling data from experiment | ACD chemical shift prediction          |
|-------------------------|------------------------------------------------------------------------------------------|----------------------------------------|
| <b>(4)</b>              | 151.29 – C1                                                                              | 152.44 – C1                            |
|                         | 3.60s, 55.06 – CH <sub>3</sub> O                                                         | 3.73, 56.12 – CH <sub>3</sub> O        |
|                         | 4.81 d (3.3), 98.72 – C2                                                                 | 5.31, 101.45 – C2                      |
|                         | 4.76 dd (9.3; 3.3), 56.41 – C3                                                           | 4.85, 56.17 – C3                       |
|                         | 4.5–4.6 m, 2H, 59.54 and 60.58, C4+C5                                                    | 4.08, 4.19, 2H, 62.85 and 62.52, C4+C5 |
|                         | 4.44 d (4.0), 59.96 – C6                                                                 | 4.42, 58.60 – C6                       |
| <b>(5)</b>              | 104.13 – C1                                                                              | 104.75 – C1                            |
|                         | 3.54 s, 50.67 – CH <sub>3</sub> O                                                        | 3.36, 54.55 – CH <sub>3</sub> O        |
|                         | 4.79 d (5.1), 55.57 – C2                                                                 | 4.72, 58.95 – C2                       |
|                         | 5.84 ddd (10.0; 5.1; 1.8), 124.62 – C3                                                   | 5.94, 125.25 – C3                      |
|                         | 5.81 dd (10.0; 2.0), 129.76 – C4                                                         | 6.12, 125.02 – C4                      |
|                         | 4.63 (8.9; 1.9), 60.07 – C5                                                              | 4.80, 55.60 – C5                       |
| 4.41 d(8.9), 64.06 – C6 | 4.37, 64.79 – C6                                                                         |                                        |

**Table S2.** Dihedral angles ( $\varphi$ ), MMFF94 energies given by SPARTAN'08 ( $E$ , kcal/mol) of representative conformers for several diastereoisomers with different relative configurations, compared with the experimental and theoretically determined data for compound **5**.

| $\varphi^{a,b}$ | from exp. <sup>c</sup> | <b>5</b><br>R1*S2*R5*S6* |                 |      | <b>5</b><br>S1*S2*R5*S6* |      | <b>5</b><br>S1*R2*R5*S6* |                       |           | <b>5</b><br>S1*S2*S5*S6* |           |           | <b>5</b><br>S1*R2*S5*R6* |           | <b>5</b><br>S1*R2*S5*R6* |           |           |
|-----------------|------------------------|--------------------------|-----------------|------|--------------------------|------|--------------------------|-----------------------|-----------|--------------------------|-----------|-----------|--------------------------|-----------|--------------------------|-----------|-----------|
|                 |                        | Theor. <sup>d</sup>      | M1 <sup>f</sup> | M2   | M3                       | M1   | M2                       | M1                    | M2        | M3                       | M1        | M2        | M3                       | M1        | M2                       | M1        | M2        |
| 2-3             | 38                     | 39                       | 38              | 35   | 36                       | 38   | 40                       | <b>78<sup>b</sup></b> | <b>83</b> | <b>76</b>                | <b>77</b> | <b>82</b> | <b>75</b>                | 43        | 45                       | <b>76</b> | <b>82</b> |
| 4-5             | 63                     | 68                       | 66              | 64   | 64                       | 67   | 68                       | 68                    | 65        | 64                       | 48        | 50        | 53                       | 456       | 46                       | 47        | 50        |
| 5-6             | 158                    | 159                      | 156             | 153  | 154                      | 158  | 162                      | 165                   | 165       | 155                      | <b>47</b> | <b>44</b> | <b>36</b>                | <b>79</b> | <b>77</b>                | <b>75</b> | <b>79</b> |
| $E$             |                        |                          | 68.1            | 70.6 | 72.1                     | 68.9 | 70.3                     | 71.7                  | 72.0      | 75.8                     | 75.1      | 76.9      | 81.8                     | 73.1      | 73.2                     | 71.6      | 73.8      |
| % <sup>e</sup>  |                        |                          | 98.4            | 1.5  | 0.1                      | 91.3 | 8.7                      | 62.3                  | 37.7      | 0.1                      | 95.3      | 4.7       | 0                        | 54.2      | 45.8                     | 97.6      | 2.4       |

<sup>a)</sup> Dihedral angle between vicinal protons, as numbered in Table S1; <sup>b)</sup> Dihedral angles in red differ by more than 35 degrees from experiment in conformers; <sup>c)</sup> Dihedral angles, calculated from the corresponding observed in this work vicinal coupling constants according to Haasnoot et al. (68); <sup>d)</sup> From B2PLYP/6-311+G(2d,2p) computations; <sup>e)</sup> Conformer population based on relative  $E$ 's; <sup>f)</sup> Mi stands for the lowest energy conformers of each diastereomer, calculated by the conformer distribution routine.

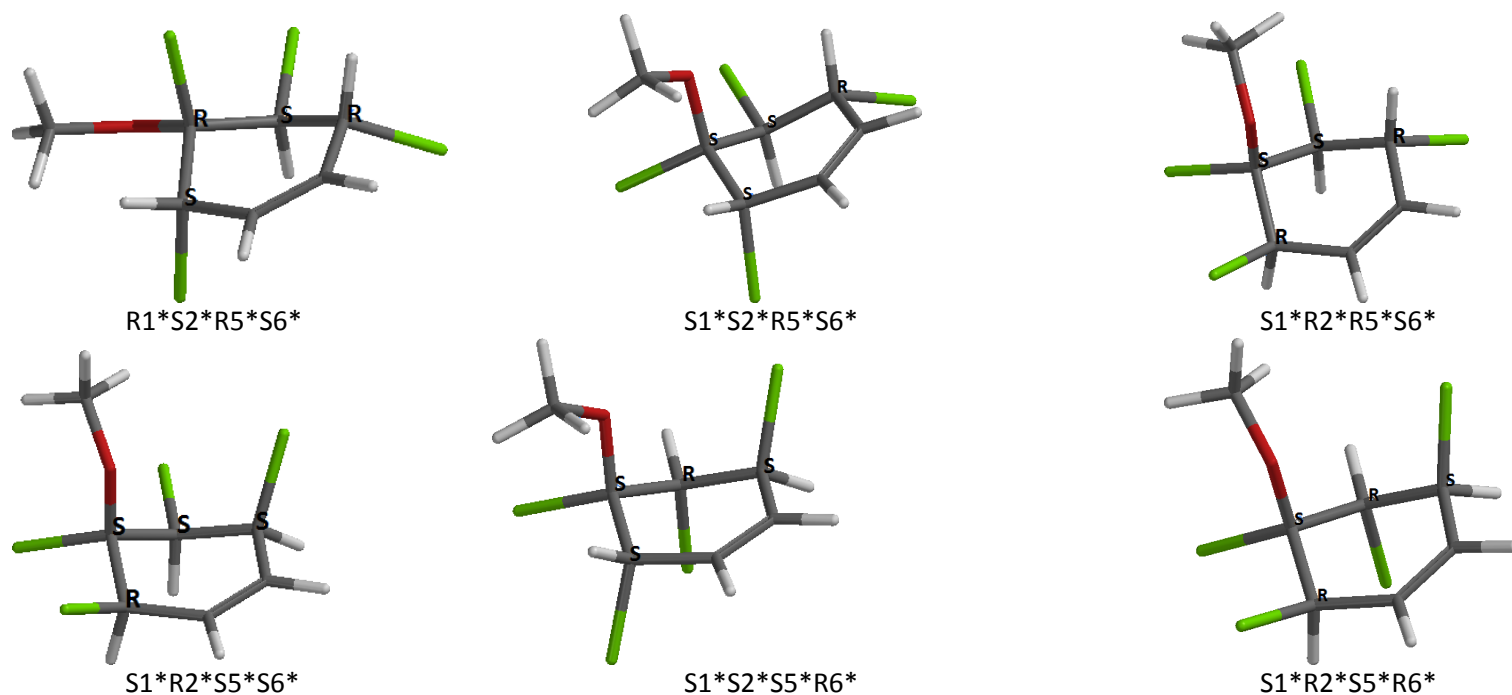

**Fig. S17.** Structure of a representative set of diastereoisomers of **5** with different relative configuration.

**Table S3.** Dihedral angles ( $\varphi$ , in degrees) and energies (B2PLYP/6-311+G(2d,2p)) of **4** and its configurational isomers **4(2)** and **4(3)**.

| $\varphi$   | exp. <sup>a</sup> | <b>4</b> <sup>b</sup> | <b>4(2)</b> | <b>4(3)</b> |
|-------------|-------------------|-----------------------|-------------|-------------|
| 2-3         | 51                | 66                    | 68          | 61          |
| 3-4         | 159               | 159                   | 160         | 151         |
| 5-6         | 39                | 69                    | 51          | 55          |
| E [hartree] |                   | -2186.84525           | -2186.83856 | -2186.84144 |

<sup>a</sup>) Calculated from the corresponding observed <sup>3</sup>J (68)

<sup>b</sup>) Structure **4** is represented in Fig. S4.

**Table S4.** Electronic ( $E_{el}$ ), thermal correction to Gibbs Free Energy, ZPE, and  $E_{disp}$  Energies as well as NImag of species involved in the catalyzed by HCl anisole-Cl<sub>2</sub> reaction in the gas phase, computed at RB3LYP/6-311+G(2d,2p) with stable wavefunction, no diradical character.

| Species                               | Description            | $E_{el}$<br>[a.u.] | Thermal corr.<br>[a.u.] | ZPE<br>[kcal/mol] | $E_{disp}$<br>[kcal/mol] | NImag<br>[freq cm <sup>-1</sup> ] |
|---------------------------------------|------------------------|--------------------|-------------------------|-------------------|--------------------------|-----------------------------------|
| <b>anisole</b>                        |                        | -346.88122         | 63.81                   | 83.31             | -5.92                    | 0                                 |
| <b>Cl<sub>2</sub></b>                 |                        | -920.41859         | -12.94                  | 0.77              | -0.02                    | 0                                 |
| <b>HCl</b>                            |                        | -460.83630         | -7.05                   | 4.17              | -0.002                   | 0                                 |
| <b><math>\pi</math>-ortho</b>         |                        | -1267.30325        | 58.73                   | 84.44             | -9.00                    | 0                                 |
| <b><math>\pi</math>-para</b>          |                        | -1267.30366        | 58.87                   | 84.49             | -8.75                    | 0                                 |
| <b>TS1</b>                            | <i>o</i> -substitution | -1728.10300        | 61.30                   | 87.95             | -11.99                   | 1 ( <i>i</i> =579.0)              |
| <b>TS2</b>                            | <i>m</i> -substitution | -1728.08929        | 59.93                   | 87.39             | -11.77                   | 1 ( <i>i</i> =846.5)              |
| <b>TS3</b>                            | <i>p</i> -substitution | -1728.10588        | 61.34                   | 88.17             | -11.58                   | 1 ( <i>i</i> =365.3)              |
| <b>TS4</b>                            | 2,3-cis addition       | -1728.10186        | 61.89                   | 88.23             | -12.53                   | 1 ( <i>i</i> =517.0)              |
| <b>TS4<sub>meta</sub><sup>a</sup></b> | 2,3-cis addition       | -1728.09124        | 61.81                   | 88.13             | -12.88                   | 1 ( <i>i</i> =366.7)              |
| <b>TS5</b>                            | 3,4-cis addition       | -1728.10649        | 61.65                   | 88.19             | -12.28                   | 1 ( <i>i</i> =580.2)              |
| <b>TS5<sub>meta</sub><sup>a</sup></b> | 3,4-cis addition       | -1728.08920        | 61.42                   | 87.70             | -12.35                   | 1 ( <i>i</i> =826.7)              |
| <b>TS6</b>                            | 2,3-cis-trans          | -1728.10686        | 61.86                   | 88.69             | -13.09                   | 1 ( <i>i</i> =59.8)               |
| <b>TS7</b>                            | 3,4-cis-trans          | -1728.11307        | 61.95                   | 88.82             | -13.03                   | 1 ( <i>i</i> =52.6)               |
| <b>TS7<sub>meta</sub><sup>a</sup></b> | 3,4-cis-trans          | -1728.09613        | 61.09                   | 87.68             | -13.18                   | 1 ( <i>i</i> =223.9)              |
| <b>TS8</b>                            | 2,3-cis HCl eli        | -1728.12564        | 62.20                   | 88.12             | -13.73                   | 1 ( <i>i</i> =275.2)              |
| <b>TS8<sub>meta</sub><sup>a</sup></b> | 2,3-trans HCl eli      | -1728.09620        | 62.65                   | 89.05             | -14.24                   | 1 ( <i>i</i> =40.8)               |
| <b>TS9</b>                            | 3,4-cis HCl eli        | -1728.13245        | 62.29                   | 88.24             | -13.42                   | 1 ( <i>i</i> =206.5)              |
| <b>TS9<sub>meta</sub><sup>a</sup></b> | 3,4-cis HCl eli        | -1728.11570        | 61.98                   | 87.50             | -13.59                   | 1 ( <i>i</i> =354.2)              |
| <b>TS11</b>                           | trans-trans rot.       | -1728.14313        | 62.78                   | 90.34             | -13.01                   | 1 ( <i>i</i> =89.0)               |
| P1                                    | <i>o</i> -product      | -1728.18290        | 57.87                   | 87.65             | -12.07                   | 0                                 |
| P2                                    | <i>m</i> -product      | -1728.18557        | 57.64                   | 87.48             | -12.06                   | 0                                 |
| P3                                    | <i>p</i> -product      | -1728.18516        | 57.28                   | 87.51             | -12.07                   | 0                                 |
| P4                                    | 2,3-cis adduct         | -1728.14422        | 63.51                   | 90.82             | -12.93                   | 0                                 |
| P5 <sup>''</sup>                      | 3,4-cis adduct         | -1728.14093        | 62.12                   | 90.45             | -12.74                   | 0                                 |
| P5 <sub>meta</sub> <sup>b</sup>       | 3,4-cis adduct         | -1728.14477        | 62.38                   | 90.50             | -13.01                   | 0                                 |
| P6                                    | 2,3-trans adduct       | -1728.15192        | 63.01                   | 90.96             | -13.10                   | 0                                 |
| P7 <sup>'</sup>                       | 3,4-trans adduct       | -1728.15364        | 63.29                   | 91.00             | -13.25                   | 0                                 |
| P7 <sup>''</sup>                      | 3,4-trans adduct       | -1728.14609        | 62.07                   | 90.66             | -12.80                   | 0                                 |
| P7 <sub>meta</sub> <sup>b</sup>       | 3,4-trans adduct       | -1728.15235        | 62.98                   | 90.91             | -12.90                   | 0                                 |

<sup>a</sup>) High energy transition states, associated with the formation of adducts, in which the orientation of the HCl leads to formation of *m*-substituted product;

<sup>b</sup>) High energy adducts, leading to *m*-substituted product formation.

**Table S5.** Electronic ( $E_{el}$ ), thermal correction to Gibbs Free Energy, ZPE, and  $E_{disp}$  Energies as well as NImag of species involved in the catalyzed by HCl anisole-Cl<sub>2</sub> reaction in simulated CCl<sub>4</sub> solvent, computed at RB3LYP/6-311+G(2d,2p) with stable wavefunction, no diradical character.

| Species                               | Description            | $E_{el}$<br>[a.u.] | Thermal corr.<br>[a.u.] | ZPE<br>[kcal/mol] | $E_{disp}$<br>[kcal/mol] | NImag<br>[freq cm <sup>-1</sup> ] |
|---------------------------------------|------------------------|--------------------|-------------------------|-------------------|--------------------------|-----------------------------------|
| <b>anisole</b>                        |                        | -346.88309         | 63.80                   | 83.30             | -5.92                    | 0                                 |
| <b>Cl<sub>2</sub></b>                 |                        | -920.41908         | -12.94                  | 0.76              | -0.02                    | 0                                 |
| <b>HCl</b>                            |                        | -460.83758         | -7.07                   | 4.15              | -0.002                   | 0                                 |
| <b><math>\pi</math>-ortho</b>         |                        | -1267.30568        | 59.01                   | 84.43             | -9.07                    | 0                                 |
| <b><math>\pi</math>-para</b>          |                        | -1267.30613        | 59.10                   | 84.46             | -8.82                    | 0                                 |
| <b>TS1</b>                            | <i>o</i> -substitution | -1728.12397        | 62.01                   | 88.74             | -11.81                   | 1 ( <i>i</i> =99.3)               |
| <b>TS2</b>                            | <i>m</i> -substitution | -1728.10594        | 60.51                   | 87.77             | -11.72                   | 1 ( <i>i</i> =215.8)              |
| <b>TS3<sup>a</sup></b>                | <i>p</i> -substitution | -1728.12778        | 62.57                   | 89.43             | -11.23                   | 1 ( <i>i</i> =59.2)               |
| <b>TS4</b>                            | 2,3-trans addition     | -1728.12433        | 60.90                   | 88.07             | -11.71                   | 1 ( <i>i</i> =299.4)              |
| <b>TS4<sub>meta</sub><sup>b</sup></b> | 2,3-trans addition     | -1728.10749        | 60.28                   | 87.42             | -12.16                   | 1 ( <i>i</i> =422.4)              |
| <b>TS5</b>                            | 3,4-cis addition       | -1728.13094        | 61.62                   | 88.68             | -11.50                   | 1 ( <i>i</i> =119.3)              |
| <b>TS5<sub>meta</sub><sup>b</sup></b> | 3,4-cis addition       | -1728.10564        | 60.15                   | 87.38             | -11.97                   | 1 ( <i>i</i> =612.6)              |
| <b>TS7<sup>c</sup></b>                | 3,4-cis-trans          | -1728.13428        |                         |                   |                          |                                   |
| <b>TS7<sub>meta</sub><sup>b</sup></b> | 3,4-cis-trans          | -1728.11264        | 60.59                   | 87.79             | -12.78                   | 1 ( <i>i</i> =47.4)               |
| <b>TS8</b>                            | 2,3-cis HCl eli        | -1728.13906        | 61.27                   | 88.29             | -13.40                   | 1 ( <i>i</i> =147.4)              |
| <b>TS8<sub>meta</sub><sup>b</sup></b> | 2,3-cis HCl eli        | -1728.12433        | 62.44                   | 88.28             | -14.13                   | 1 ( <i>i</i> =115.4)              |
| <b>TS9</b>                            | 3,4-cis HCl eli        | -1728.14637        | 61.63                   | 88.49             | -13.01                   | 1 ( <i>i</i> =82.9)               |
| <b>TS9<sub>meta</sub><sup>b</sup></b> | 3,4-cis HCl eli        | -1728.12515        | 61.88                   | 87.78             | -13.35                   | 1 ( <i>i</i> =196.5)              |
| <b>TS10</b>                           | cis-cis rot.           | -1728.14181        | 62.61                   | 90.08             | -12.84                   | 1 ( <i>i</i> =70.1)               |
| <b>TS11</b>                           | trans-trans rot.       | -1728.14681        | 63.07                   | 90.27             | -12.70                   | 1 ( <i>i</i> =95.1)               |
| P1                                    | <i>o</i> -product      | -1728.18593        | 56.98                   | 87.54             | -11.66                   | 0                                 |
| P2                                    | <i>m</i> -product      | -1728.18856        | 56.83                   | 87.38             | -11.14                   | 0                                 |
| P3                                    | <i>p</i> -product      | -1728.18783        | 56.00                   | 87.36             | -11.60                   | 0                                 |
| P5'                                   | 3,4-cis adduct         | -1728.15184        | 63.51                   | 90.68             | -12.56                   | 0                                 |
| P5''                                  | 3,4-cis adduct         | -1728.14558        | 62.35                   | 90.39             | -12.57                   | 0                                 |
| P5 <sub>meta</sub> <sup>d</sup>       | 3,4-cis adduct         | -1728.14903        | 63.28                   | 90.70             | -12.52                   | 0                                 |
| P6                                    | 2,3-trans adduct       | -1728.15556        | 63.07                   | 90.84             | -12.87                   | 0                                 |
| P6 <sub>meta</sub> <sup>d</sup>       | 2,3-trans adduct       | -1728.14840        | 62.94                   | 90.63             | -13.54                   | 0                                 |
| P7'                                   | 3,4-trans adduct       | -1728.15713        | 63.15                   | 90.86             | -12.85                   | 0                                 |
| P7''                                  | 3,4-trans adduct       | -1728.15043        | 62.45                   | 90.56             | -12.70                   | 0                                 |
| P7 <sub>meta</sub> <sup>d</sup>       | 3,4-trans adduct       | -1728.15616        | 63.02                   | 90.86             | -12.54                   | 0                                 |

<sup>a)</sup> The  $E_{el}$  was determined from B3LYP/6-311+G(2d,2p)//B3LYP/6-31+G(d,p) calculations; ZPE, Thermal corr. to Gibbs Free Energy,  $E_{disp}$  and NImag are from B3LYP/6-31+G(d,p) calculations.

<sup>b)</sup> High energy transition states, associated with the formation of adducts, in which the orientation of the HCl leads to formation of *m*-substituted product;

<sup>c)</sup> The  $E_{el}$  was determined from IEF-PCM single-point calculations on gas-phase B3LYP/6-311+G(2d,2p) optimized structure;

<sup>d)</sup> High energy adducts, leading to *m*-substituted product formation.



**Table S6.** Electronic ( $E_{el}$ ), thermal correction to Gibbs Free Energy, ZPE, and  $E_{disp}$  Energies as well as NImag of species involved in the catalyzed by HCl anisole- $Cl_2$  reaction in simulated  $CCl_4$  solvent, computed at PBEPBE/6-311+G(2d,2p) with stable wavefunction, no diradical character.

| Species                               | Description            | $E_{el}$<br>[a.u.] | Thermal<br>corr. [a.u.] | ZPE<br>[kcal/mol] | $E_{disp}$<br>[kcal/mol] | NImag<br>[freq $cm^{-1}$ ] |
|---------------------------------------|------------------------|--------------------|-------------------------|-------------------|--------------------------|----------------------------|
| <b>anisole</b>                        |                        | -346.43720         | 61.46                   | 80.99             | -3.45                    | 0                          |
| <b>Cl<sub>2</sub></b>                 |                        | -920.01680         | -12.94                  | 0.76              | -0.01                    | 0                          |
| <b>HCl</b>                            |                        | -460.62819         | -7.15                   | 4.08              | 0.00                     | 0                          |
| <b><math>\pi</math>-ortho</b>         |                        | -1266.46376        | 57.61                   | 82.30             | -5.22                    | 0                          |
| <b><math>\pi</math>-para</b>          |                        | -1266.46294        | 57.63                   | 82.25             | -5.41                    | 0                          |
| <b>TS1</b>                            | <i>o</i> -substitution | -1727.07983        | 59.22                   | 85.94             | -6.82                    | 1 ( <i>i</i> =115.2)       |
| <b>TS2</b>                            | <i>m</i> -substitution | -1727.06476        | 58.67                   | 85.14             | -6.60                    | 1 ( <i>i</i> =255.7)       |
| <b>TS3</b>                            | <i>p</i> -substitution | -1727.08310        | 59.95                   | 86.36             | -6.50                    | 1 ( <i>i</i> =82.1)        |
| <b>TS4</b>                            | 2,3-cis addition       | -1727.07739        | 59.65                   | 86.16             | -7.03                    | 1 ( <i>i</i> =128.0)       |
| <b>TS4<sub>meta</sub><sup>a</sup></b> | 2,3-trans addition     | -1727.06353        | 57.86                   | 85.06             | -7.07                    | 1 ( <i>i</i> =86.0)        |
| <b>TS5</b>                            | 3,4-cis addition       | -1727.08441        | 59.36                   | 86.14             | -6.90                    | 1 ( <i>i</i> =141.6)       |
| <b>TS5<sub>meta</sub><sup>a</sup></b> | 3,4-cis addition       | -1727.06366        | 58.51                   | 85.07             | -6.96                    | 1 ( <i>i</i> =425.3)       |
| <b>TS6</b>                            | 2,3-cis-trans          | -1727.08065        | 58.92                   | 86.04             | -7.31                    | 1 ( <i>i</i> =33.5)        |
| <b>TS7<sup>b</sup></b>                | 3,4-cis-trans          | -1727.08574        | 59.26                   | 85.85             | -7.39                    | 1 ( <i>i</i> =69.3)        |
| <b>TS7<sub>meta</sub><sup>a</sup></b> | 3,4-cis-trans          | -1727.06733        | 58.69                   | 85.22             | -7.32                    | 1 ( <i>i</i> =65.9)        |
| <b>TS8</b>                            | 2,3-cis HCl eli        | -1727.09471        | 60.03                   | 86.20             | -7.91                    | 1 ( <i>i</i> =100.5)       |
| <b>TS8<sub>meta</sub><sup>a</sup></b> | 2,3-cis HCl eli        | -1727.08277        | 60.57                   | 86.08             | -8.23                    | 1 ( <i>i</i> =124.1)       |
| <b>TS9</b>                            | 3,4-cis HCl eli        | -1727.10036        | 60.38                   | 86.46             | -7.70                    | 1 ( <i>i</i> =77.9)        |
| <b>TS9<sub>meta</sub><sup>a</sup></b> | 3,4-cis HCl eli        | -1727.08374        | 60.08                   | 85.66             | -7.79                    | 1 ( <i>i</i> =165.0)       |
| <b>TS10</b>                           | cis-cis rot.           | -1727.09295        | 60.27                   | 87.42             | -7.40                    | 1 ( <i>i</i> =93.8)        |
| <b>TS11</b>                           | trans-trans rot.       | -1727.09732        | 60.27                   | 87.67             | -7.49                    | 1 ( <i>i</i> =106.0)       |
| P1                                    | <i>o</i> -substituted  | -1727.13532        | 56.18                   | 85.35             | -7.67                    | 0                          |
| P2                                    | <i>m</i> -substituted  | -1727.13717        | 54.76                   | 85.27             | -5.80                    | 0                          |
| P3                                    | <i>p</i> -substituted  | -1727.13673        | 54.66                   | 85.30             | -5.73                    | 0                          |
| P4                                    | 2,3-cis adduct         | -1727.10235        | 61.07                   | 88.13             | -7.36                    | 0                          |
| P5'                                   | 3,4-cis adduct         | -1727.10536        | 61.21                   | 88.08             | -7.74                    | 0                          |
| P5' <sub>meta</sub> <sup>c</sup>      | 3,4-cis adduct         | -1727.10147        | 60.84                   | 88.07             | -7.30                    | 0                          |
| P5''                                  | 3,4-cis adduct         | -1727.09890        | 60.17                   | 87.78             | -7.30                    | 0                          |
| P6                                    | 2,3-trans adduct       | -1727.10854        | 60.98                   | 88.32             | -7.55                    | 0                          |
| P6 <sub>meta</sub> <sup>c</sup>       | 2,3-trans adduct       | -1727.10163        | 60.78                   | 88.08             | -8.10                    | 0                          |
| P7'                                   | 3,4-trans adduct       | -1727.10933        | 60.63                   | 88.28             | -7.38                    | 0                          |
| P7' <sub>meta</sub> <sup>c</sup>      | 3,4-trans adduct       | -1727.10812        | 61.39                   | 88.34             | -7.40                    | 0                          |
| P7''                                  | 3,4-trans adduct       | -1727.10323        | 60.57                   | 88.07             | -7.38                    | 0                          |

<sup>a)</sup> High energy transition states, associated with the formation of adducts, in which the orientation of the HCl leads to formation of *m*-substituted product;

<sup>b)</sup> The  $E_{el}$  was determined from IEF-PCM single-point calculations on gas-phase PBEPBE/6-311+G(2d,2p) optimized structure; ZPE, Thermal corr. to Gibbs Free Energy,  $E_{disp}$  and NImag are from gas-phase calculations.

<sup>c)</sup> High energy adducts, leading to *m*-substituted product formation.

**Table S7.** Electronic ( $E_{el}$ ) energies of species involved in the catalyzed by HCl anisole-Cl<sub>2</sub> reactions in isolation (gas phase) and in simulated CCl<sub>4</sub> solvent, computed at RB2-PLYP/6-311+G(2d,2p)//RB3LYP/6-311+G(2d,2p).

| gas phase                        |                             |                 | CCl <sub>4</sub> solvent         |                             |                 |
|----------------------------------|-----------------------------|-----------------|----------------------------------|-----------------------------|-----------------|
| Species                          | Description                 | $E_{el}$ [a.u.] | Species                          | Description                 | $E_{el}$ [a.u.] |
| $\pi$ - <i>ortho</i>             |                             | -1266.65825     | $\pi$ - <i>ortho</i>             |                             | -1266.66059     |
| $\pi$ - <i>para</i>              |                             | -1266.65819     | $\pi$ - <i>para</i>              |                             | -1266.66049     |
| TS1                              | <i>o</i> -substitution      | -1727.29579     | TS1                              | <i>o</i> -substitution      | -1727.31867     |
| TS2                              | <i>m</i> -substitution      | -1727.28106     | TS2                              | <i>m</i> -substitution      | -1727.29904     |
| TS3                              | <i>p</i> -substitution      | -1727.29812     | TS3 <sup>a</sup>                 | <i>p</i> -substitution      | -1727.32191     |
| TS4                              | 2,3-cis addition            | -1727.29551     | TS4                              | 2,3-trans addition          | -1727.31960     |
| TS4 <sub>meta</sub> <sup>b</sup> | 2,3-cis addition            | -1727.28440     | TS4 <sub>meta</sub> <sup>b</sup> | 2,3-trans addition          | -1727.30196     |
| TS5                              | 3,4-cis addition            | -1727.30007     | TS5                              | 3,4-cis addition            | -1727.32596     |
| TS5 <sub>meta</sub> <sup>b</sup> | 3,4-cis addition            | -1727.28150     | TS5 <sub>meta</sub> <sup>b</sup> | 3,4-cis addition            | -1727.29942     |
| TS6                              | 2,3-cis-trans isomerization | -1727.30165     | TS7                              | 3,4-cis-trans isomerization | -1727.33170     |
| TS7                              | 3,4-cis-trans isomerization | -1727.30881     | TS7 <sub>meta</sub> <sup>b</sup> | 3,4-cis-trans isomerization | -1727.30847     |
| TS7 <sub>meta</sub> <sup>b</sup> | 3,4-cis-trans isomerization | -1727.29020     | TS8                              | 2,3-cis HCl elimination     | -1727.33568     |
| TS8                              | 2,3-cis HCl elimination     | -1727.32144     | TS8 <sub>meta</sub> <sup>b</sup> | 2,3-cis HCl elimination     | -1727.32086     |
| TS8 <sub>meta</sub> <sup>b</sup> | 2,3-trans HCl elimination   | -1727.29121     | TS9                              | 3,4-cis HCl elimination     | -1727.34307     |
| TS9                              | 3,4-cis HCl elimination     | -1727.32844     | TS9 <sub>meta</sub> <sup>b</sup> | 3,4-cis HCl elimination     | -1727.32075     |
| TS9 <sub>meta</sub> <sup>b</sup> | 3,4-cis HCl elimination     | -1727.31126     | TS10                             | cis-cis rotation            | -1727.34426     |
| TS11                             | trans-trans rotation        | -1727.34505     | TS11                             | trans-trans rotation        | -1727.34842     |
| P1                               | <i>o</i> -product           | -1727.38459     | P1                               | <i>o</i> -product           | -1727.38735     |
| P2                               | <i>m</i> -product           | -1727.38684     | P2                               | <i>m</i> -product           | -1727.38921     |
| P3                               | <i>p</i> -product           | -1727.38642     | P3                               | <i>p</i> -product           | -1727.38884     |
| P4                               | 2,3-cis adduct              | -1727.34737     | P5'                              | 3,4-cis adduct              | -1727.35421     |
| P5''                             | 3,4-cis adduct              | -1727.34316     | P5 <sub>meta</sub> <sup>c</sup>  | 3,4-cis adduct              | -1727.35180     |
| P5 <sub>meta</sub> <sup>c</sup>  | 3,4-cis adduct              | -1727.34798     | P5''                             | 3,4-cis adduct              | -1727.34746     |
| P6                               | 2,3-trans adduct            | -1727.35437     | P6                               | 2,3-trans adduct            | -1727.35775     |
| P7'                              | 3,4-trans adduct            | -1727.35573     | P6 <sub>meta</sub> <sup>c</sup>  | 2,3-trans adduct            | -1727.35058     |
| P7''                             | 3,4-trans adduct            | -1727.34746     | P7'                              | 3,4-trans adduct            | -1727.35884     |
| P7 <sub>meta</sub> <sup>c</sup>  | 3,4-trans adduct            | -1727.35445     | P7''                             | 3,4-trans adduct            | -1727.35150     |
|                                  |                             |                 | P7 <sub>meta</sub> <sup>c</sup>  | 3,4-trans adduct            | -1727.35789     |

<sup>a)</sup> B2-PLYP/6-311+G(2d,2p)//B3LYP/6-31+G(d,p);

<sup>b)</sup> High energy transition states, associated with the formation of adducts, in which the orientation of the HCl leads to formation of *m*-substituted product;

<sup>c)</sup> High energy adducts, leading to *m*-substituted product formation.

**Table S8.** Cartesian coordinates species involved in HCl-catalyzed anisole-Cl<sub>2</sub> reactions in isolation (gas-phase) at RB3LYP/6-311+G(2d,2p). The energy data for these structures are shown in Table S4.

|                                                |                                                |
|------------------------------------------------|------------------------------------------------|
| <b>anisole</b>                                 | <b>TS1</b>                                     |
| C,0,-0.922113,-0.519093,0.                     | C,0,-2.910097,0.374467,-0.21787                |
| C,0,0.,0.527366,0.                             | C,0,-2.601603,-2.034999,0.178656               |
| C,0,1.369741,0.246632,0.                       | C,0,-3.401119,-0.917193,-0.166648              |
| C,0,1.80792,-1.067384,0.                       | C,0,-1.286608,-1.8535,0.460448                 |
| C,0,0.893257,-2.120843,0.                      | C,0,-1.568182,0.600331,0.095345                |
| C,0,-0.464811,-1.836836,0.                     | C,0,-0.663092,-0.527584,0.399772               |
| H,0,-1.98344,-0.325516,0.                      | Cl,0,0.535782,-0.626298,-1.029057              |
| H,0,2.067374,1.072118,0.                       | H,0,-3.563932,1.190842,-0.479325               |
| H,0,2.869976,-1.272255,0.                      | H,0,-3.044063,-3.019543,0.202318               |
| H,0,1.238352,-3.144984,0.                      | H,0,-0.635903,-2.678127,0.713271               |
| H,0,-1.186483,-2.64264,0.                      | H,0,0.039499,-0.302621,1.219325                |
| O,0,-0.333755,1.851301,0.                      | Cl,0,3.469452,-0.037171,-1.111661              |
| C,0,-1.710443,2.199139,0.                      | H,0,2.90779,0.038203,0.412815                  |
| H,0,-2.216943,1.822151,0.891537                | Cl,0,2.288237,0.088881,1.820097                |
| H,0,-1.743156,3.28468,0.                       | H,0,-4.444593,-1.079501,-0.403225              |
| H,0,-2.216943,1.822151,-0.891537               | O,0,-0.990697,1.76781,0.16284                  |
| <b>Cl<sub>2</sub></b>                          | C,0,-1.698788,2.970435,-0.196576               |
| Cl,0,-1.0178691818,0.,0.                       | H,0,-0.972797,3.76617,-0.081195                |
| Cl,0,1.0178691818,0.,0.                        | H,0,-2.032112,2.912048,-1.231017               |
| <b>HCl</b>                                     | H,0,-2.540397,3.126314,0.4761                  |
| Cl,0,0.,0.,0.0711080502                        | <b>TS2</b>                                     |
| H,0,0.,0.,-1.2088368529                        | C,0,-2.046102508,1.6500271751,-1.228142864     |
| <b>anisole-Cl<sub>2</sub> pi-complex ortho</b> | C,0,-2.3693866917,-0.225729546,0.3341739136    |
| C,0,1.2376330032,0.1508828686,1.092028594      | C,0,-2.8696087161,0.7296573233,-0.585980425    |
| C,0,1.6667432259,0.9307106369,0.0075926579     | C,0,-1.0263006722,-0.2511348708,0.6042782178   |
| C,0,2.2919449744,0.3183581882,-1.0786929495    | C,0,-0.6954106074,1.6522070477,-0.9661566963   |
| C,0,2.4937898789,-1.0605637031,-1.0658516007   | C,0,-0.1250665019,0.698787967,-0.0334275396    |
| C,0,2.0810528463,-1.8378562019,0.0089991813    | Cl,0,1.0834110238,-0.2840126368,-1.1213423734  |
| C,0,1.4527444085,-1.2229866771,1.0880973502    | H,0,-2.4728934918,2.3479113948,-1.9333363752   |
| H,0,0.7817497189,0.6461478156,1.93705175       | H,0,-0.5788370388,-0.9529401357,1.2904656938   |
| H,0,2.62372077,0.8964395129,-1.9267357856      | H,0,-0.0249090157,2.3464784289,-1.4506090666   |
| H,0,2.2430624211,-2.9060078605,0.0058444174    | H,0,0.6253364111,1.0958779702,0.6803087229     |
| H,0,1.1236037253,-1.8113822917,1.9333954456    | Cl,0,3.8030402375,-1.2383166802,-0.5590457899  |
| Cl,0,-3.51573735,-0.1376369902,-0.3805505633   | H,0,3.2466687335,-0.3636979229,0.6389855481    |
| Cl,0,-1.5246145994,-0.1159167874,0.1710972526  | Cl,0,2.5857825452,0.5145226641,1.771659856     |
| H,0,2.9800337681,-1.5259603508,-1.9125804218   | H,0,-3.9322031628,0.712249899,-0.7894383497    |
| O,0,1.4353892421,2.2654416668,0.114660519      | O,0,-3.3036273179,-1.0440749663,0.8609921994   |
| C,0,1.7972823373,3.1072935108,-0.9730642192    | C,0,-2.8709329322,-2.0501431792,1.7838280549   |
| H,0,1.2647039572,2.8271928251,-1.8840767329    | H,0,-3.768590304,-2.5850841488,2.0736443509    |
| H,0,1.5064262463,4.111147757,-0.6791566012     | H,0,-2.1693056431,-2.7362129798,1.307971138    |
| H,0,2.8737582956,3.0802797907,-1.1547833738    | H,0,-2.4109903478,-1.5974408037,2.6632617842   |
| <b>anisole-Cl<sub>2</sub> pi-complex para</b>  | <b>TS3</b>                                     |
| C,0,-0.6543728517,1.6477532357,-0.0516614019   | C,0,-0.6918134881,3.9386063614,1.2611134741    |
| C,0,-1.0637194425,1.1540337479,1.1841623427    | C,0,-0.291991195,4.1453061287,-1.1742078955    |
| C,0,-1.9830143941,0.1124425277,1.2696835888    | C,0,-0.4275335905,4.7328477487,0.1136387208    |
| C,0,-2.5039714466,-0.4409332862,0.0984973816   | C,0,-0.4134306242,2.8039634921,-1.3173752534   |
| C,0,-2.1016636906,0.0550124995,-1.1482023115   | C,0,-0.8168878869,2.5932261903,1.1182795652    |
| C,0,-1.1872228886,1.0884390574,-1.2187855132   | C,0,-0.6777664122,1.9285627514,-0.17562791     |
| H,0,0.0310179413,2.4806977943,-0.107960357     | Cl,0,0.8120105748,0.795914183,0.001872445      |
| H,0,-0.6644739123,1.580765378,2.0939173301     | H,0,-0.7829483776,4.3943585368,2.2338290816    |
| H,0,-2.279666419,-0.2562939308,2.2388699409    | H,0,-0.0814309911,4.7970614489,-2.0091587293   |
| H,0,-2.5180834842,-0.390408803,-2.0402449702   | H,0,-0.3045289197,2.3364198275,-2.2856022942   |
| H,0,-0.8814734539,1.4646908668,-2.1852114949   | H,0,-1.0163032088,1.9603900085,1.9717792249    |
| Cl,0,3.7164941218,-0.7472783372,0.0674569388   | H,0,-1.449289229,1.1609008287,-0.3475143503    |
| Cl,0,1.8680853202,0.1847460849,0.0507718321    | Cl,0,1.0612300668,-2.1549795577,0.172510568    |
| O,0,-3.4022807694,-1.460852638,0.0632357811    | H,0,-0.5288878355,-1.6975489415,0.0414839097   |
| C,0,-3.8409658941,-2.024592384,1.2932383088    | Cl,0,-1.9458357935,-1.1831947766,-0.0782411404 |
| H,0,-4.356702998,-1.2839609278,1.9079648042    | O,0,-0.2778784902,6.0416141206,0.147642202     |
| H,0,-4.5342591878,-2.8159095323,1.0250635021   | C,0,-0.3802209378,6.7676083088,1.3902323057    |
| H,0,-3.0060115308,-2.4485890229,1.8546397673   | H,0,0.3887265229,6.4368287016,2.0854859921     |
|                                                | H,0,-0.2191547162,7.8053540962,1.1230297043    |
|                                                | H,0,-1.3715939152,6.6421193598,1.8211029168    |

**TS4**

C,0,-2.2684745066,-1.4344137795,0.0063036174  
 C,0,-2.8507091743,0.7397375073,-0.8006645106  
 C,0,-2.9935799982,-0.6430663198,-0.8708387484  
 C,0,-1.9952549775,1.3908070331,0.1096323873  
 C,0,-1.262178903,-0.8248171998,0.9056521261  
 C,0,-1.2307880595,0.6510314865,0.9564061316  
 H,0,-3.4355651644,1.3445654785,-1.481695083  
 H,0,-3.6784491066,-1.07706579,-1.580980137  
 H,0,-1.9168749309,2.4667649914,0.1052516775  
 H,0,-1.2446939203,-1.2998035617,1.8825886425  
 H,0,-0.5361664175,1.1125599821,1.6411973992  
 Cl,0,1.5602656683,2.0176319678,0.2533981262  
 H,0,2.4179708287,0.6798014034,-0.2523575241  
 Cl,0,0.4000924999,-1.2629243887,0.1503393988  
 Cl,0,3.1079274929,-0.582573962,-0.6912792923  
 O,0,-2.3707940759,-2.7380878747,0.1310717911  
 C,0,-3.19000096,-3.4894628461,-0.7855273831  
 H,0,-2.8422736758,-3.3382790464,-1.8057381979  
 H,0,-3.0613100544,-4.5258032143,-0.4965808003  
 H,0,-4.2342894568,-3.1981555791,-0.684841567

**TS4 (meta)**

C,0,0.7870946646,2.4837266893,-0.221180141  
 C,0,2.4617926703,0.8197419061,-0.6021961725  
 C,0,1.8965973,2.0644884808,-0.9012514495  
 C,0,1.9352260422,-0.0529763249,0.3761939192  
 C,0,0.1569182444,1.6044805609,0.7603577624  
 C,0,0.8021837863,0.323143943,1.0635235701  
 H,0,0.3214944363,3.4373129178,-0.4188452831  
 H,0,3.3460484736,0.4873241856,-1.1301423896  
 H,0,2.3443283464,2.6818303898,-1.6658943379  
 H,0,-0.1984887776,2.1175100174,1.6509951895  
 H,0,0.3400705187,-0.3079622996,1.8047551371  
 Cl,0,-1.3673393604,-2.0685016286,0.7989796627  
 H,0,-2.6833916526,-1.2880308337,-0.03367263  
 Cl,0,-1.4904946721,1.2088602574,-0.1215733754  
 Cl,0,-3.6982030095,-0.5134640033,-0.722164754  
 O,0,2.625981496,-1.1905264095,0.5433165759  
 C,0,2.1753660494,-2.1338779043,1.5356653578  
 H,0,2.2356335401,-1.6881401611,2.5300354348  
 H,0,1.159302888,-2.4597066692,1.3219028563  
 H,0,2.8664006151,-2.966787327,1.4672111174

**TSS**

C,0,-2.2126516915,-1.42156311,0.0148421422  
 C,0,-2.8737502408,0.7147824628,-0.8539012501  
 C,0,-2.9606949773,-0.7108161988,-0.861501974  
 C,0,-2.0323817131,1.4013171946,0.0558584643  
 C,0,-1.266501808,-0.7734987768,0.9291562875  
 C,0,-1.2540534583,0.7011806692,0.9138325307  
 H,0,-2.2578762208,-2.5011728992,0.0294974758  
 H,0,-3.6089574323,-1.214047444,-1.5604323708  
 H,0,-1.9883303612,2.4784410884,0.003618876  
 H,0,-1.3075852457,-1.1791546367,1.9383956814  
 H,0,-0.5731287935,1.2091660883,1.5792145711  
 Cl,0,1.5327479736,1.9927753599,0.0424584179  
 H,0,2.4138410638,0.6533667054,-0.2286925931  
 Cl,0,0.4342166897,-1.306374889,0.3310599425  
 Cl,0,3.1625564106,-0.6659292125,-0.4621501178  
 O,0,-3.5530626333,1.4830313171,-1.6770560183  
 C,0,-4.4130700337,0.9213714371,-2.6898929118  
 H,0,-3.8374967542,0.2938404429,-3.3670916157  
 H,0,-5.2226158784,0.3578577431,-2.2301075477  
 H,0,-4.8114496785,1.7761698447,-3.2235742063

**TSS (meta)**

C,0,-2.16824882,-1.4461166298,0.0149359833  
 C,0,-2.83987654,0.7099608598,-0.8170010522  
 C,0,-2.9200881694,-0.7087299969,-0.8560445103  
 C,0,-2.0150095828,1.3908505251,0.0666723682  
 C,0,-1.2496071884,-0.7797611567,0.9340246977  
 C,0,-1.2213602111,0.6831765415,0.9411754516  
 H,0,-2.1847074261,-2.5237653484,0.0251350674  
 H,0,-3.4513474056,1.2561703609,-1.5230915728  
 H,0,-1.9715299111,2.4689097785,0.0457370435  
 H,0,-1.2685520457,-1.1958397468,1.9402982902  
 H,0,-0.577196718,1.1825471186,1.6462168806  
 Cl,0,1.4053766946,1.9275289148,-0.0916439748  
 H,0,2.3619791937,0.627754585,-0.2533976153  
 Cl,0,0.5287421155,-1.2794419592,0.4059365367  
 Cl,0,3.1637748194,-0.6845116957,-0.3715492918  
 O,0,-3.7699383198,-1.1926512854,-1.7883259157  
 C,0,-3.8742452187,-2.6106375262,-1.9284694894  
 H,0,-2.9081534484,-3.0466813403,-2.1867131676  
 H,0,-4.2559565843,-3.065492125,-1.0125245816  
 H,0,-4.5780268138,-2.7748974736,-2.7372052657

**TS6**

C,0,-2.0436223063,0.9127636478,-0.3811838016  
 C,0,-1.3569112767,-1.2975022578,0.2403731716  
 C,0,-2.377630104,-0.3716306077,-0.0204747662  
 C,0,0.0105328258,-0.9960274952,0.1694309039  
 C,0,-0.601924516,1.3119279901,-0.497943045  
 C,0,0.3998684722,0.2631297851,-0.1726895845  
 H,0,-1.6493820708,-2.3028932254,0.5155209441  
 H,0,0.7609507713,-1.7337668255,0.4062713473  
 H,0,0.44213863178,1.6546471228,-1.5211193929  
 H,0,1.4422217206,0.5315631889,-0.2279525407  
 Cl,0,3.0425963575,-0.4089446818,1.5038917204  
 H,0,3.2323023998,-0.7422155875,-0.181368124  
 Cl,0,-0.2794348846,2.764141367,0.5499192454  
 Cl,0,3.1800224198,-0.9503531465,-1.6150326511  
 H,0,-3.4080093533,-0.6778465724,0.061875982  
 O,0,-2.8823461519,1.8780574182,-0.683866418  
 C,0,-4.3020887169,1.6481786609,-0.6016380108  
 H,0,-4.5986511113,0.870095716,-1.3032384724  
 H,0,-4.5788702779,1.376047843,0.4154152826  
 H,0,-4.7586898225,2.592364248,-0.8738030351

**TS7**

C,0,-2.0004411603,0.9042068647,-0.569405514  
 C,0,-1.3513701395,-1.3153987939,0.0988928978  
 C,0,-2.3649320505,-0.3450536142,-0.2325268488  
 C,0,0.0185212889,-0.9811102805,0.1089447143  
 C,0,-0.5736242333,1.2993389381,-0.6478398232  
 C,0,0.4087784259,0.2745360584,-0.2187265045  
 H,0,-2.7396479495,1.6572739372,-0.80260076  
 H,0,0.7495729245,-1.7166527262,0.4087702458  
 H,0,-0.3380953602,1.5694891425,-1.6839280753  
 H,0,1.4550198218,0.5365320136,-0.2001086507  
 Cl,0,2.8758584209,-0.3802794166,1.724289051  
 H,0,3.2249464024,-0.8143179134,0.0894512804  
 Cl,0,-0.3283409776,2.8490020525,0.2822786069  
 Cl,0,3.3173559557,-1.118763982,-1.3265122994  
 H,0,-3.4077209179,-0.6174261604,-0.1963452915  
 O,0,-1.6345984429,-2.5536136136,0.4237162043  
 C,0,-2.9927489314,-3.0390543837,0.4774264691  
 H,0,-3.5573511282,-2.4986556213,1.2342656654  
 H,0,-3.4652913842,-2.9532905276,-0.4989366336  
 H,0,-2.9032071816,-4.0822607543,0.7561532179

**TS7 (meta)**

C,0,-1.9432587148,1.0420658558,-0.4667347174  
 C,0,-1.3460087189,-1.2389680154,0.0537602586  
 C,0,-2.3333745196,-0.233570505,-0.2095326903  
 C,0,0.0094744751,-0.9771016842,0.0867211952  
 C,0,-0.5010645334,1.3630511431,-0.5251678201  
 C,0,0.4579659663,0.308989336,-0.1455966576  
 H,0,-2.6386126848,1.8406796693,-0.6662395491  
 H,0,-1.712086812,-2.2387590247,0.2482934118  
 H,0,0.7254226588,-1.7476843721,0.3236822303  
 H,0,-0.2430711486,1.5853410934,-1.5740919262  
 H,0,1.5046315266,0.5540894766,-0.0979564625  
 Cl,0,2.9041642521,-0.5486593363,1.6791924212  
 H,0,3.1381826999,-0.8201728876,0.0652610135  
 Cl,0,-0.1277641395,2.920927903,0.3425291264  
 Cl,0,3.1115624814,-0.9739968139,-1.4248328296  
 O,0,-3.6001513073,-0.6918848071,-0.1575245256  
 C,0,-4.660658439,0.2425839022,-0.3706723505  
 H,0,-4.6376889208,1.0314687082,0.3826437091  
 H,0,-4.597974786,0.6778418982,-1.3694165645  
 H,0,-5.5781309903,-0.3278832755,-0.2769925818

**TS8**

C,0,1.8069810365,-0.7722487605,-1.2250474731  
 C,0,2.0595911054,0.2461457696,-0.3008847018  
 C,0,1.035625094,1.099192692,0.0590568652  
 C,0,-0.3426201559,0.8760518867,-0.4551019377  
 C,0,-0.513185638,-0.2378261617,-1.4063199684  
 C,0,0.5479599396,-1.0183587729,-1.7779993886  
 Cl,0,-1.0563465149,2.3977105572,-1.1465291793  
 H,0,2.6367997593,-1.398561352,-1.5262485205  
 H,0,-0.9671082727,0.6745801445,0.4595388272  
 H,0,-1.4852247106,-0.3459637675,-1.8571339361  
 H,0,0.4098232544,-1.8302290105,-2.474830322  
 Cl,0,-2.0151528465,0.1830894726,2.2296318603  
 Cl,0,-1.9078841784,-2.1711814607,0.1812282356  
 H,0,2.025851276,-1.0236742491,1.3102647883  
 H,0,3.0538385199,0.3719571705,0.0960102617  
 O,0,1.131937681,2.1067028156,0.8938873224  
 C,0,2.3714702336,2.3602335769,1.5776054452  
 H,0,2.6527167826,1.4958993785,2.176740215  
 H,0,3.1547116556,2.6059249849,0.8618152174  
 H,0,2.172077609,3.210436651,2.2191715056

**TS8 (meta)**

C,0,1.5743268343,-0.4840561903,-0.1980570249  
 C,0,2.3333453872,1.8746479781,-0.2875223856  
 C,0,2.5890913326,0.4888203063,-0.2421614865  
 C,0,1.053241136,2.3254139523,-0.3052812764  
 C,0,0.2553621011,-0.0729822265,-0.2499415389  
 C,0,-0.0728070549,1.3713099323,-0.2848006776  
 H,0,3.1656517486,2.5630327025,-0.2999665869  
 H,0,0.814684297,3.3783688542,-0.3005327356  
 H,0,-0.5696984843,-0.7674280053,-0.2940673283  
 H,0,-0.7644738781,1.5419393207,-1.1175025421  
 Cl,0,-2.0102750963,-1.6494874274,1.3150308092  
 H,0,-2.7968445268,-0.8586727745,-0.2562837246  
 Cl,0,-1.0594388952,1.8391034863,1.1916581245  
 Cl,0,-3.136118325,-0.2387965852,-1.4286296239  
 H,0,3.6111055278,0.1323679527,-0.2576251307  
 O,0,2.003149161,-1.7528861949,-0.1534033912  
 C,0,1.0281581828,-2.8173706898,-0.2319927722  
 H,0,0.5312061189,-2.7946267315,-1.2022240328  
 H,0,1.6033238403,-3.7311138307,-0.1326039897  
 H,0,0.2903926342,-2.7324846473,0.5630764202

**TS9**

C,0,1.7866886487,-0.8011612238,-1.2180023236  
 C,0,2.0323777412,0.2142707243,-0.2341154645  
 C,0,1.0308505402,1.0199308909,0.1605077627  
 C,0,-0.3422961841,0.8282958019,-0.3330366983  
 C,0,-0.5157023266,-0.1799169011,-1.3688102694  
 C,0,0.5226147958,-0.965357531,-1.8042277322  
 Cl,0,-1.1008397104,2.4121067066,-0.8179989248  
 H,0,1.1899849862,1.7922179266,0.8989441619  
 H,0,-0.9626675157,0.5051176286,0.5557005016  
 H,0,-1.4821730446,-0.2508081509,-1.8571436394  
 H,0,0.3494957383,-1.7229874398,-2.5499790338  
 Cl,0,-2.1093545724,-0.2141520321,2.1713346797  
 Cl,0,-2.0464341252,-2.3190467748,-0.1421580121  
 H,0,-2.1379978136,-1.2943927275,1.116364058  
 H,0,3.0330964129,0.2996657419,0.1627538795  
 O,0,2.8411050012,-1.5346672391,-1.5139972181  
 C,0,2.7302958912,-2.6289602395,-2.4481888849  
 H,0,1.9852700987,-3.3427049757,-2.1029232568  
 H,0,2.4780902375,-2.2552776091,-3.4387535926  
 H,0,3.7121084297,-3.0874998354,-2.4619034709

**TS9 (meta)**

C,0,1.4709324099,-1.695269549,-0.6804633271  
 C,0,1.9953832621,-0.5746878921,0.0353513009  
 C,0,1.2986279308,0.5932315076,0.0602218333  
 C,0,-0.0303302679,0.6646189278,-0.5585893983  
 C,0,-0.5005232731,-0.4913743097,-1.3092920353  
 C,0,0.2603863067,-1.6570042871,-1.3288248364  
 Cl,0,-0.3045983774,2.220125632,-1.4627473656  
 H,0,1.6420643751,1.4670856703,0.588992488  
 H,0,-0.7585862126,0.7761623126,0.3226578159  
 H,0,-1.3698967323,-0.3803046616,-1.9337504895  
 H,0,-0.100123548,-2.5218022189,-1.8643864964  
 Cl,0,-2.1093868981,0.9143716307,1.8347310411  
 Cl,0,-2.6402571591,-1.5997686335,0.0643546536  
 H,0,-2.4585103204,-0.3207680169,1.0644405519  
 H,0,2.0766627084,-2.5913147109,-0.7021520557  
 O,0,3.192343372,-0.8074066838,0.6198720463  
 C,0,3.7934078341,0.2595801864,1.3545831191  
 H,0,4.7257785371,-0.1376723673,1.7411855176  
 H,0,3.99801503,1.1121435603,0.7045852986  
 H,0,3.1532410229,0.568804903,2.1823753381

**TS11**

C,0,-0.9831713783,1.5470501103,0.3495990784  
 C,0,-2.0458872169,0.9571956344,1.156469384  
 C,0,-2.2677979525,-0.361249802,1.1525485237  
 C,0,-1.4445112973,-1.2612193451,0.3014654783  
 C,0,-0.0938109531,-0.6807740277,-0.1039649924  
 C,0,-0.056522734,0.7876726792,-0.2538029945  
 Cl,0,-2.3928622355,-1.6132037064,-1.2615765436  
 H,0,-3.0687701412,-0.8034109523,1.7268930099  
 H,0,-1.3169044012,-2.2434778721,0.7388682969  
 H,0,0.3034230902,-1.2049394463,-0.9638253408  
 H,0,0.7578773978,1.2333033981,-0.8053704801  
 Cl,0,3.9493017092,-0.6668545597,-1.0202274441  
 Cl,0,1.1316160529,-1.1830680769,1.2573056713  
 H,0,3.0741352452,-0.8830676395,-0.0944461749  
 H,0,-2.6500815044,1.6307762695,1.7479051728  
 O,0,-0.9477140401,2.9169068402,0.2997985501  
 C,0,-1.4729596885,3.5054441847,-0.8967347324  
 H,0,-1.3681011823,4.5797285026,-0.7762842044  
 H,0,-0.911018483,3.1775449462,-1.772420674  
 H,0,-2.5274914701,3.2520377185,-1.0254631263

**P1**

C,0,-2.0549671401,0.5197086515,0.4308829919  
 C,0,-2.3012230615,-1.8842463743,0.3893321235  
 C,0,-2.4116893601,-0.6712440262,1.0591544939  
 C,0,-1.8360450814,-1.8997646049,-0.9255399784  
 C,0,-1.5862802703,0.514303564,-0.8846644982  
 C,0,-1.4846036591,-0.7185333533,-1.5540494358  
 Cl,0,-0.9009935816,-0.7561900212,-3.2010207048  
 H,0,-2.1361837087,1.4495974994,0.9705454322  
 H,0,-2.5865691484,-2.8088471416,0.8702242871  
 H,0,-1.7451291336,-2.8291962801,-1.4676820562  
 H,0,-0.0752996353,-1.5645299783,1.3750514492  
 Cl,0,1.1640139642,2.0893148291,2.6088164514  
 H,0,1.1791588104,0.8276011506,2.3386940924  
 Cl,0,1.1272418727,-1.5776316058,1.8506698129  
 H,0,-2.7783713922,-0.6420134456,2.0758009462  
 O,0,-1.2159535848,1.6160037236,-1.5709947844  
 C,0,-1.2811675269,2.8823431277,-0.9181551903  
 H,0,-0.9264030419,3.6026564126,-1.6483037883  
 H,0,-2.306998439,3.1259708671,-0.6354958356  
 H,0,-0.637362625,2.9056742528,-0.0379530532

**P2**

C,0,1.6277827152,0.8274351477,0.2314592309  
 C,0,2.8191198553,-1.1465089842,0.9284013354  
 C,0,2.5946429514,0.214292663,1.0369243819  
 C,0,2.0992106722,-1.9300614649,0.0253804737  
 C,0,0.8851686066,0.0592402269,-0.6708258378  
 C,0,1.1449131532,-1.308511108,-0.7605911912  
 H,0,3.5669860169,-1.6137709698,1.5537792247  
 H,0,2.2764362907,-2.9903708013,-0.0626743821  
 H,0,0.1402747073,0.5005129963,-1.3122099574  
 H,0,-0.5657643595,-0.7521776515,1.1899188269  
 Cl,0,-3.4607135724,1.876214878,0.6649459296  
 H,0,-2.873822831,0.8693783797,1.2179388429  
 Cl,0,0.2226143417,-2.2593843068,-1.9153173515  
 Cl,0,-1.4801403189,-0.9466813927,2.08015472  
 H,0,3.1528504386,0.8240961909,1.7318121254  
 O,0,1.4790583857,2.1647544228,0.3924139674  
 C,0,0.5384559009,2.856251592,-0.4276320391  
 H,0,-0.4790283134,2.5052654625,-0.2495402786  
 H,0,0.6130441922,3.9002684494,-0.1406820793  
 H,0,0.7882711672,2.750966242,-1.4850459419

**P3**

C,0,-1.5741111744,-0.5075818379,-0.6830084159  
 C,0,-2.3925741655,-0.4609434217,1.5866063303  
 C,0,-2.5266112373,-0.0850017942,0.2447093404  
 C,0,-1.3286379894,-1.244605565,1.996294395  
 C,0,-0.5015631148,-1.2999046596,-0.2682600358  
 C,0,-0.3825538201,-1.6640420555,1.0639330825  
 Cl,0,0.9635008915,-2.6687887952,1.5802077306  
 H,0,-1.6460180902,-0.2314740158,-1.7230408338  
 H,0,-3.1345184262,-0.1243589283,2.2962003641  
 H,0,-1.2298030115,-1.5312633082,3.0325126911  
 H,0,0.2280573409,-1.6380733678,-0.9894465415  
 H,0,0.67009889,0.7481665721,0.4507871051  
 Cl,0,-0.1575018428,3.0888151953,-2.6545050309  
 H,0,0.3959546318,2.7227435823,-1.5474678652  
 Cl,0,1.3337179327,1.8521407112,0.5331941547  
 O,0,-3.6045234379,0.685601241,-0.050310246  
 C,0,-3.7862123268,1.1119532401,-1.3983804513  
 H,0,-3.9196596145,0.2584952648,-2.0663490688  
 H,0,-4.6901809403,1.7128436149,-1.396317557  
 H,0,-2.9457547779,1.7189594361,-1.7384083605

**P4**

C,0,-2.2249284213,-0.1888801809,0.1343966724  
 C,0,-1.3445249255,1.9534642474,-0.5767514638  
 C,0,-2.3501256204,0.9116516039,-0.6373253434  
 C,0,-0.1581701362,1.7814230797,0.0297651576  
 C,0,-1.0958633452,-0.2251652885,1.1412472666  
 C,0,0.1639198094,0.4703740848,0.6464315132  
 H,0,-1.558803064,2.8897201273,-1.0747331786  
 H,0,-3.1943055124,1.0411368597,-1.2955903791  
 H,0,0.61115512,2.5384328908,0.0049561455  
 H,0,-1.4223250418,0.3689576989,2.0001298569  
 H,0,0.8881522328,0.5325710657,1.4490959363  
 Cl,0,1.0640339023,-0.5928310681,-0.628540389  
 H,0,2.9975971371,0.740420637,-0.7568043169  
 Cl,0,-0.7658050729,-1.8584941071,1.8243672015  
 Cl,0,3.9795671532,1.5818564209,-0.6939740602  
 O,0,-3.0616068616,-1.2312870562,0.2004452961  
 C,0,-4.1935429756,-1.2338938105,-0.667877025  
 H,0,-3.8780727531,-1.1915415449,-1.7112176736  
 H,0,-4.7097908935,-2.1683826593,-0.4749849564  
 H,0,-4.8527510776,-0.392812087,-0.4462933451

**P4 (meta)**

C,0,-1.4276975871,-2.4970544769,0.0472829425  
C,0,-2.888230769,-0.6626538887,-0.6051456237  
C,0,-2.5230991296,-2.0662387639,-0.5913510278  
C,0,-2.0171168682,0.2908452984,-0.2186884324  
C,0,-0.6591162895,-1.4949865446,0.8457806758  
C,0,-0.6432796396,-0.097211052,0.2382399753  
H,0,-1.1329201797,-3.5337859124,0.0808145845  
H,0,-3.8482326362,-0.3592477302,-0.9972838412  
H,0,-3.164159923,-2.7664235005,-1.1089800174  
H,0,-1.1635499726,-1.3630964759,1.8096021893  
H,0,-0.2091299853,0.5976567838,0.9457453975  
Cl,0,0.4979574211,0.0319789681,-1.2402592377  
H,0,2.1096516083,1.4632735251,-0.2475296476  
Cl,0,0.9998372695,-2.0655224856,1.2940532847  
Cl,0,2.7189931994,2.3733597036,0.4402743246  
O,0,-2.3375327011,1.5950179458,-0.4032202569  
C,0,-1.6449704845,2.6074924108,0.332216836  
H,0,-1.7132097388,2.4290614075,1.4072216685  
H,0,-0.6014288702,2.6844855089,0.0291204978  
H,0,-2.153350406,3.5360282709,0.0922488503

**P5 ' '**

C,0,-1.4533888091,-1.9237190818,-0.2024544441  
C,0,-2.2717957892,0.3586785296,-0.1129591603  
C,0,-2.3739029209,-1.0272994156,-0.5699716167  
C,0,-1.1309553193,0.8182171654,0.4446879647  
C,0,-0.3781748081,-1.5114778195,0.7534989601  
C,0,0.0459454266,-0.0621352512,0.5770677181  
H,0,-1.4896606088,-2.9505497855,-0.5330430682  
H,0,-3.1813438032,-1.3178304514,-1.2241191603  
H,0,-1.0330680372,1.8647965992,0.6903244381  
H,0,-0.7872013577,-1.5605164985,1.76759398  
H,0,0.7131525714,0.237732541,1.3753914264  
Cl,0,1.1610606052,0.1456146381,-0.9543633115  
H,0,2.864955814,1.2915946766,0.1495419805  
Cl,0,1.0039852043,-2.6786407915,0.7776643482  
Cl,0,3.6594518031,1.9407963583,0.9404451603  
O,0,-3.2906384374,1.2364490025,-0.291230657  
C,0,-4.577302973,0.7617327687,-0.68615887  
H,0,-4.5737867601,0.4082801917,-1.7182342601  
H,0,-4.9321167827,-0.0286180689,-0.0234279594  
H,0,-5.2383700381,1.6193764682,-0.6087945132

**P5 (meta)**

C,0,-1.573324435,-0.5134310991,0.5875514472  
C,0,-2.2589052859,1.7160980259,-0.1230778041  
C,0,-2.4214990707,0.2633492842,-0.1077882088  
C,0,-1.137670006,2.2937786834,0.319037129  
C,0,-0.531769753,0.1647794511,1.4236489237  
C,0,-0.0041524204,1.4654830722,0.8327359135  
H,0,-1.6591504607,-1.5847878897,0.6473259415  
H,0,-3.0632172266,2.2990210514,-0.5493952687  
H,0,-0.987386773,3.3606941778,0.2406983008  
H,0,-0.9610373057,0.4488986659,2.3891961049  
H,0,0.6003188561,1.9893264273,1.5635938788  
Cl,0,1.1759621141,1.2027381166,-0.5801143555  
H,0,2.3133079349,-1.2152869974,-0.6520907778  
Cl,0,0.8052488173,-0.977755309,1.8868581906  
Cl,0,3.0343133222,-2.1154293157,-1.2237957883  
O,0,-3.480066719,-0.1507321532,-0.8468675107  
C,0,-3.7135453453,-1.5535084711,-0.9268122479  
H,0,-2.8567122987,-2.0650043443,-1.3690337167  
H,0,-3.9180425033,-1.9704832194,0.0614934566  
H,0,-4.5836734616,-1.6763332152,-1.5636770837

**P6**

C,0,2.0074254429,-0.3111584044,0.1332086594  
C,0,0.6817011961,-1.5627832676,-1.4624328026  
C,0,1.8903150358,-1.3775576078,-0.6819018977  
C,0,-0.4285211755,-0.8366385851,-1.262326057  
C,0,0.9222405514,0.7134118882,0.2033542953  
C,0,-0.449794119,0.19000513,-0.1995401702  
H,0,0.6874378696,-2.3337208458,-2.2211554794  
H,0,-1.3323171299,-1.0073876826,-1.8270119662  
H,0,0.8945616851,1.1835813641,1.1783315132  
H,0,-1.1217081605,1.0137883417,-0.4030605143  
Cl,0,-4.6311561008,-0.4121744989,0.0839254983  
H,0,-3.4707972209,-0.5243262206,0.6419972959  
Cl,0,1.3504570816,2.0908895176,-0.9542155655  
Cl,0,-1.206814211,-0.5638709792,1.3708762128  
H,0,2.6863156542,-2.0983014599,-0.7813610524  
O,0,3.050056955,0.0110352576,0.9214638113  
C,0,4.1936687463,-0.8406960388,0.8951199601  
H,0,3.9335294995,-1.848129803,1.224269666  
H,0,4.6226884737,-0.878947303,-0.1074789946  
H,0,4.906949926,-0.4012088023,1.5845075835

**P7'**

C,0,-1.8737074716,-0.1794468065,0.3119355108  
C,0,-1.7425646064,-1.1941908041,1.3530042766  
C,0,-0.6519557506,-1.9580398002,1.4405109259  
C,0,0.4641198056,-1.8010840236,0.4701132338  
C,0,0.4786532528,-0.4603983126,-0.2510562688  
C,0,-0.8315352714,0.1619937136,-0.4753411588  
Cl,0,0.3048622473,-3.1329108261,-0.8185952717  
H,0,-0.5654947102,-2.7336127948,2.1872830149  
H,0,1.4299311847,-2.0039339485,0.9152020472  
H,0,1.0896216968,-0.5093498143,-1.1422230241  
H,0,-0.9032351985,0.929644315,-1.2277821393  
Cl,0,0.8046073857,3.8077981195,-0.8916115201  
Cl,0,1.5596690941,0.694758507,0.8542542241  
H,0,1.1334069692,2.7525915699,-0.2171226934  
H,0,-2.5754715779,-1.3124462591,2.0313222953  
O,0,-3.1172195683,0.3389716184,0.2546582404  
C,0,-3.3740657773,1.3582847158,-0.711866411  
H,0,-2.7297715293,2.2221752668,-0.5445172025  
H,0,-3.2246910008,0.9770629414,-1.7323247499  
H,0,-4.412989174,1.6397826225,-0.5753407293

**P7' '**

C,0,-1.9133905805,1.0791918387,-1.1232154983  
C,0,-1.7212064424,-1.007263166,0.1197388  
C,0,-2.4273173079,-0.110076861,-0.7915493945  
C,0,-0.4460931326,-0.7598296597,0.4843425674  
C,0,-0.6115933577,1.5314326468,-0.5659413306  
C,0,0.266173627,0.3984798435,-0.0552762381  
H,0,-2.4439419107,1.754745969,-1.7782023061  
H,0,0.076695635,-1.4476018833,1.1311879057  
H,0,-0.0633379264,2.1589258093,-1.2568390875  
H,0,1.0400734542,0.7730480482,0.6014239258  
Cl,0,4.1189065057,-1.1843767906,0.4983960555  
H,0,3.1858165572,-0.8736215779,-0.3426286466  
Cl,0,-0.9608630021,2.6704196185,0.8616720465  
Cl,0,1.3226637598,-0.1458255655,-1.5802352982  
H,0,-3.3798081206,-0.412586289,-1.1985649242  
O,0,-2.311986198,-2.1309579968,0.5965973224  
C,0,-3.7232607831,-2.3043362469,0.4696543161  
H,0,-4.2678209751,-1.4463988716,0.8657635013  
H,0,-4.0131453141,-2.4842338917,-0.5666286225  
H,0,-3.9602762904,-3.1839744163,1.0600494298

**P7 (meta)**

C,0,-2.0344813703,0.4264358734,-0.5368286736  
C,0,-1.1491816929,-1.2561411075,1.0064130872  
C,0,-2.2163301228,-0.7001599463,0.1800195142  
C,0,0.1004409895,-0.7928252806,0.9317423514  
C,0,-0.7481024903,1.145964232,-0.4545220194  
C,0,0.4408188151,0.3037366358,-0.0097572636  
H,0,-2.819414554,0.8724365103,-1.1248343921  
H,0,-1.4127837366,-2.0700659088,1.6668192757  
H,0,0.8981140991,-1.2213880088,1.5206065742  
H,0,-0.5109031959,1.6798589391,-1.3658379895  
H,0,1.2434585712,0.9340111383,0.3504595915  
Cl,0,4.2924683447,-1.4332200977,0.1650338588  
H,0,3.2641716268,-1.1494464349,-0.5629475399  
Cl,0,-0.8841458652,2.5543348082,0.7964788708  
Cl,0,1.188979729,-0.468663947,-1.5537344443  
O,0,-3.3488442009,-1.4362227548,0.2425690151  
C,0,-4.474459649,-0.9925644334,-0.5107508834  
H,0,-4.7932291939,-0.0010760878,-0.1847598865  
H,0,-4.2437619748,-0.972491864,-1.5773760293  
H,0,-5.2629322805,-1.7132641697,-0.3196669076

**Table S9.** Cartesian coordinates of species involved in catalyzed by HCl anisole-Cl<sub>2</sub> reactions in simulated CCl<sub>4</sub> solvent at RB3LYP/6-311+G(2d,2p). The energy data for these structures are shown in Table S5.

**anisole**

C,0,-0.9220162655,-0.5182939385,0.  
 C,0,0.0009470345,0.5277879708,0.  
 C,0,1.3711539223,0.2462842452,0.  
 C,0,1.8092014447,-1.0682949972,0.  
 C,0,0.893600689,-2.1214162474,0.  
 C,0,-0.4649357021,-1.8364439096,0.  
 H,0,-1.9832013457,-0.324081946,0.  
 H,0,2.0702211816,1.0707779263,0.  
 H,0,2.8712128063,-1.2735954031,0.  
 H,0,1.2382682604,-3.1457654943,0.  
 H,0,-1.1871816986,-2.6417452023,0.  
 O,0,-0.3335391204,1.8515641599,0.  
 C,0,-1.7124667344,2.1997286435,0.  
 H,0,-2.2180445339,1.822218094,0.891314564  
 H,0,-1.7466424042,3.2850450046,0.  
 H,0,-2.2180445339,1.822218094,-0.891314564

**Cl<sub>2</sub>**

Cl,0,-1.0183191956,0.,0.  
 Cl,0,1.0183191956,0.,0.

**HCl**

Cl,0,0.,0.,0.0706993744  
 H,0,0.,0.,-1.2106903744

**anisole-Cl<sub>2</sub> pi-complex ortho**

C,0,0.9324139163,-0.4728303647,1.1972563869  
 C,0,1.525378927,0.4228198703,0.2924986896  
 C,0,2.1035598684,-0.0629409383,-0.8808977962  
 C,0,2.0980407592,-1.4337851935,-1.1310976552  
 C,0,1.524634841,-2.3282622026,-0.2342539286  
 C,0,0.9436603523,-1.8395014202,0.9314862342  
 H,0,0.5235810265,-0.0846583922,2.1188987285  
 H,0,2.5577493014,0.60627768,-1.5943641034  
 H,0,1.5283623402,-3.388567417,-0.4414294293  
 H,0,0.4931559252,-2.5186666078,1.6419339497  
 Cl,0,-3.6841343163,0.2718640621,-0.3917279366  
 Cl,0,-1.7364994795,-0.1228461044,0.2091791655  
 H,0,2.5500283005,-1.8002702225,-2.0428654988  
 O,0,1.4924242605,1.7313706692,0.652340398  
 C,0,2.0403195941,2.6980792781,-0.241246824  
 H,0,1.5209177719,2.6856776934,-1.200745987  
 H,0,1.8917999981,3.6602147778,0.2385518037  
 H,0,3.1072506131,2.5302918322,-0.397722197

**anisole-Cl<sub>2</sub> pi-complex para**

C,0,-0.1268628747,1.7558471105,0.5142505454  
 C,0,-0.6723699205,0.8598061228,1.4324694285  
 C,0,-1.6880818941,-0.0154466578,1.0616421166  
 C,0,-2.1707932296,0.0094869401,-0.2491491298  
 C,0,-1.6335599504,0.9138528857,-1.1760742041  
 C,0,-0.6242277054,1.7764320068,-0.7953349873  
 H,0,0.6273420743,2.4643434606,0.8236397819  
 H,0,-0.3042540392,0.8399521049,2.4488860656  
 H,0,-2.0890515667,-0.703627516,1.7887507372  
 H,0,-2.023351288,0.915022764,-2.1839294989  
 H,0,-0.2160618842,2.4714168003,-1.5159545168  
 Cl,0,3.9087025321,-0.9864194534,-0.2368890055  
 Cl,0,2.1738416166,0.1193869451,0.0897648801  
 O,0,-3.1536294194,-0.8001389639,-0.7201336982  
 C,0,-3.7360712326,-1.75475664,0.1650464186  
 H,0,-4.2223292368,-1.2640672585,1.0097429901  
 H,0,-4.4791083237,-2.2854594791,-0.4216735981  
 H,0,-2.9881586575,-2.4605401721,0.5297786744

**TS1**

C,0,-2.9311495004,0.3739574949,-0.2820618342  
 C,0,-2.6119850129,-2.031232183,0.1716924113  
 C,0,-3.4022959238,-0.9214595236,-0.2410845289  
 C,0,-1.3213114088,-1.8371373589,0.5213766517  
 C,0,-1.6149552979,0.6237952141,0.1164194222  
 C,0,-0.7026405481,-0.4992327971,0.4613455292  
 Cl,0,0.5248752437,-0.5905126331,-0.9260480794  
 H,0,-3.5792244049,1.1773461562,-0.5916022036  
 H,0,-3.0505991142,-3.0172166286,0.187020061  
 H,0,-0.6783925531,-2.6522470634,0.819545152  
 H,0,-0.0698900249,-0.2624178726,1.3185123509  
 Cl,0,3.5771182181,-0.1784758185,-1.2620852694  
 H,0,3.1137668286,-0.0421761662,0.3824051774  
 Cl,0,2.6628857996,0.0657452815,1.773374576  
 H,0,-4.4277005618,-1.1018656842,-0.535756126  
 O,0,-1.0660927501,1.7930698684,0.2272590769  
 C,0,-1.7740132903,2.9966491307,-0.1642318204  
 H,0,-1.0656757526,3.7984666974,0.0005928076  
 H,0,-2.0436249189,2.9368657222,-1.2157024065  
 H,0,-2.6523180273,3.1270421638,0.4634420522

**TS2**

C,0,2.292094,-2.176377,0.351027  
 C,0,2.588865,0.24718,-0.039001  
 C,0,3.095182,-1.074756,0.052853  
 C,0,1.251206,0.458833,0.166952  
 C,0,0.952012,-1.99279,0.571752  
 C,0,0.363716,-0.659333,0.489002  
 Cl,0,-0.901791,-0.804621,-0.88905  
 H,0,2.731952,-3.161205,0.394756  
 H,0,0.799491,1.435763,0.102738  
 H,0,0.294303,-2.818886,0.798062  
 H,0,-0.302196,-0.417421,1.329055  
 Cl,0,-3.796586,0.206253,-1.139423  
 H,0,-3.161244,0.536895,0.391329  
 Cl,0,-2.547351,0.802479,1.714908  
 H,0,4.15236,-1.211875,-0.134108  
 O,0,3.507809,1.181824,-0.338737  
 C,0,3.067573,2.541778,-0.475953  
 H,0,2.63398,2.901736,0.457298  
 H,0,3.958397,3.112267,-0.712271  
 H,0,2.343985,2.631044,-1.28616

**TS3**

C,0,-2.1960827983,0.3226834551,-0.9212036599  
 C,0,-2.3869300785,-0.0564377047,1.540659839  
 C,0,-2.9786032739,0.0180011732,0.2375494255  
 C,0,-1.054187896,0.1487927192,1.6857686919  
 C,0,-0.8599565573,0.532877978,-0.7774633714  
 C,0,-0.1797867983,0.4415215855,0.5304511146  
 Cl,0,1.0700610228,-0.9338303072,0.3887849171  
 H,0,-2.6591135405,0.3772759983,-1.8977733729  
 H,0,-3.0329019652,-0.2897569999,2.3794332622  
 H,0,-0.584600233,0.0864633742,2.6620421883  
 H,0,-0.2411558049,0.759967249,-1.6397269628  
 H,0,0.4687823257,1.3095549279,0.7081839712  
 Cl,0,4.0870943343,-1.4960256194,0.2169027868  
 H,0,3.7631676175,0.2634334674,0.3290593698  
 Cl,0,3.4493630976,1.6517027743,0.4191902541  
 O,0,-4.2661251313,-0.2195034038,0.2015553347  
 C,0,-5.0140992913,-0.2081623437,-1.0439338848  
 H,0,-4.6307877034,-0.9807842291,-1.71336866  
 H,0,-6.0372558273,-0.4324661281,-0.7519377976  
 H,0,-4.9580557837,0.7800672609,-1.5044433158

**TS4**

C,0,-2.0982282708,-0.0597231676,0.0619274678  
C,0,-1.981767833,2.1206629467,-0.9055163379  
C,0,-2.6431588217,0.914463803,-0.7733505617  
C,0,-0.7560271658,2.426202719,-0.252632455  
C,0,-0.7731744248,0.15598377,0.7075010211  
H,0,-0.1655741102,1.4938722494,0.5266853134  
H,0,-2.4217922577,2.8731028177,-1.5470778763  
H,0,-3.5721560934,0.7479189017,-1.2933999243  
H,0,-0.2942055316,3.38838185,-0.4124406446  
H,0,-0.7973940481,-0.1517489556,1.7512984924  
H,0,0.8033236279,1.6429484925,0.9887724534  
Cl,0,3.3510480358,0.8975858214,1.1574545608  
H,0,3.4049978073,-0.4150223379,0.3087451355  
Cl,0,0.4216509633,-0.9978402113,-0.0978758947  
Cl,0,3.4268279797,-1.7452494193,-0.5518900811  
O,0,-2.6509655053,-1.1959411211,0.3640509536  
C,0,-3.9032934437,-1.6021739587,-0.2453373351  
H,0,-3.7787426072,-1.6731673186,-1.3229152242  
H,0,-4.1128064879,-2.5770683138,0.1763481895  
H,0,-4.6875258128,-0.8960795676,0.0166227474

**TS4 (meta)**

C,0,-1.2979260209,-2.448754009,0.1956970427  
C,0,-2.8702771122,-0.8848597308,-0.6948856131  
C,0,-2.4296712428,-2.2045219236,-0.5285545357  
C,0,-2.1994884646,0.2347306619,-0.1468720707  
C,0,-0.5508072054,-1.3386433501,0.7874463734  
C,0,-1.050905799,0.0247128116,0.576177371  
H,0,-0.9206731695,-3.4495452624,0.3455383392  
H,0,-3.7562606843,-0.687474723,-1.2849810134  
H,0,-2.9843101867,-3.0104183718,-0.9849010534  
H,0,-0.3645448555,-1.5182157174,1.8504220323  
H,0,-0.4369781489,0.831312337,0.9596766278  
Cl,0,1.7353216843,2.2015006395,0.8733769237  
H,0,2.7783060993,1.1829705462,0.2161012869  
Cl,0,1.1703032818,-1.3948343158,0.0676049808  
Cl,0,3.7631258945,0.1714097136,-0.4221802114  
O,0,-2.7542614335,1.4230014391,-0.4236808671  
C,0,-2.0929221686,2.60665874,0.0686534556  
H,0,-2.0865638016,2.6093017123,1.1586255185  
H,0,-1.0734797498,2.6644546337,-0.3085586297  
H,0,-2.6820169167,3.4377521691,-0.3011299574

**TS5**

C,0,-1.722096,0.668401,0.659219  
C,0,-2.441609,-1.474045,-0.391759  
C,0,-2.620111,-0.071677,-0.163467  
C,0,-1.389835,-2.11143,0.157355  
C,0,-0.665606,0.033707,1.213411  
C,0,-0.401438,-1.398866,0.984797  
Cl,0,1.23522,-1.436023,0.097732  
H,0,-1.861075,1.726332,0.809497  
H,0,-3.158469,-1.977961,-1.022453  
H,0,-1.227913,-3.165802,-0.014592  
H,0,0.056979,0.582994,1.800182  
H,0,-0.200472,-1.923352,1.918875  
Cl,0,3.827893,-0.211117,-0.914927  
H,0,2.9897,1.046389,-0.18551  
Cl,0,2.216373,2.138358,0.466339  
O,0,-3.64556,0.4549,-0.7684  
C,0,-3.942422,1.874157,-0.664754  
H,0,-3.114716,2.452171,-1.066223  
H,0,-4.830592,2.013,-1.268123  
H,0,-4.141517,2.134848,0.371281

**TS5 (meta)**

C,0,-1.7840314763,-0.6115455641,0.6490517767  
C,0,-2.1029924778,1.5421599895,-0.3653336059  
C,0,-2.5268335034,0.2013085003,-0.162479232  
C,0,-0.9594364877,2.079151433,0.2232885208  
C,0,-0.5640324808,-0.1050283376,1.2851083714  
C,0,-0.1825723909,1.2883918821,1.0278854778  
H,0,-2.0469893264,-1.6400954065,0.8361029689  
H,0,-2.7080020204,2.153296706,-1.0226843573  
H,0,-0.6770938886,3.0998192069,0.015986945  
H,0,-0.5782344504,-0.2925104895,2.3631081613  
H,0,0.7279479908,1.6561276852,1.4751023024  
Cl,0,2.77870658,1.5956778309,-0.5242167351  
H,0,3.2349829196,0.1029093294,-0.5097538735  
Cl,0,0.8865128426,-1.1383608172,0.7221345991  
Cl,0,3.6464070859,-1.4332146945,-0.4682939156  
O,0,-3.6506883448,-0.1353703012,-0.820308196  
C,0,-4.1194492577,-1.4861907379,-0.705852771  
H,0,-3.3746322339,-2.1843635843,-1.0885169555  
H,0,-4.3614629665,-1.7232026865,0.330858979  
H,0,-5.0163201133,-1.535283944,-1.3125574605

**TS7 (meta)**

C,0,-2.0617258845,0.4786718236,-0.3713810383  
C,0,-1.0768517572,-1.5830261725,0.3879650698  
C,0,-2.2282505992,-0.7994300337,0.0765190833  
C,0,0.2224879559,-1.1076294496,0.2795061653  
C,0,-0.6997134507,0.9964108561,-0.5975246806  
C,0,0.4371946004,0.1806789724,-0.1490595786  
H,0,-2.8878522791,1.1256669358,-0.6175140877  
H,0,-1.2543091069,-2.5912340489,0.7398635703  
H,0,1.0631767132,-1.7222851228,0.5602007808  
H,0,-0.5549731661,1.0087391507,-1.6962898343  
H,0,1.4342693902,0.5877836566,-0.2133147125  
Cl,0,3.2476695549,-0.001738893,1.5680227921  
H,0,3.4416675554,-0.5168161794,-0.0279008028  
Cl,0,-0.5332506671,2.7347221618,-0.1164916122  
Cl,0,3.449226734,-0.9373733047,-1.438401569  
O,0,-3.3967290064,-1.4279530193,0.285187026  
C,0,-4.6080227135,-0.7000741241,0.0396420306  
H,0,-4.6641246675,0.1775387506,0.6840421502  
H,0,-4.6727049345,-0.4045087934,-1.0079965005  
H,0,-5.4130772714,-1.3851771663,0.2788757482

**TS8**

C,0,1.8403523018,-0.7142501648,-1.3170520362  
C,0,2.0829449333,0.2629878129,-0.361311669  
C,0,1.0316226282,1.0611740328,0.0656255923  
C,0,-0.3454202682,0.8577539931,-0.4796437641  
C,0,-0.5009406916,-0.2529628494,-1.4463843701  
C,0,0.5649062704,-0.9838406245,-1.8576485371  
Cl,0,-0.9031742713,2.3942859939,-1.2985468897  
H,0,2.6790017495,-1.307104934,-1.6582438162  
H,0,-1.03384913,0.731849215,0.3751060655  
H,0,-1.4915226964,-0.4101195372,-1.8421070987  
H,0,0.4445067043,-1.7827824857,-2.5724344112  
Cl,0,-2.3301251495,0.3405713806,2.2272866473  
Cl,0,-1.6893020922,-2.2362813769,0.5698070809  
H,0,-2.0690560555,-0.9554010213,1.48029705  
H,0,3.0793157007,0.4014020885,0.0252560611  
O,0,1.1044630469,2.0078497804,0.9551148203  
C,0,2.3524766965,2.2927078976,1.6301761591  
H,0,2.6750038368,1.4168478663,2.1880846696  
H,0,3.1051085895,2.5971586889,0.9065625008  
H,0,2.1238469746,3.1080358086,2.3049408683

**TS8 (meta)**

C,0,0.89419199,-1.6169876836,1.689644923  
C,0,1.8595879554,-0.8552770065,0.9960138584  
C,0,1.5858955047,-0.1756698434,-0.1952681053  
C,0,0.3064187215,-0.252868751,-0.7235752243  
C,0,-0.7328434518,-1.0315572554,-0.0371591295  
C,0,-0.3561318214,-1.7572719168,1.1816967912  
Cl,0,-1.611009286,-2.1152717271,-1.2145036548  
H,0,1.174421484,-2.1038285995,2.6118669412  
H,0,0.0552055849,0.1761635695,-1.6777426978  
H,0,-1.5327801652,-0.3130454396,0.2762226287  
H,0,-1.1145985381,-2.3488554089,1.6717096458  
Cl,0,-0.3927910128,2.5224877026,-0.1729624404  
Cl,0,-3.1245245151,1.1994979855,0.7158213294  
H,0,-1.9337305063,1.8933963505,0.3264550277  
H,0,2.867441441,-0.7906055912,1.3840802285  
O,0,2.6179525953,0.4843478577,-0.7450344548  
C,0,2.4315974475,1.1231217049,-2.0209852657  
H,0,3.3851785683,1.5859188815,-2.2491119076  
H,0,2.1924044226,0.3815850662,-2.7843819972  
H,0,1.6531835903,1.8801780087,-1.9583777664

**TS9**

C,0,1.8089057093,-0.817189523,-1.224841263  
C,0,2.050004899,0.1837544064,-0.2229766469  
C,0,1.0468313225,0.9798582696,0.1807559054  
C,0,-0.325940343,0.8097291834,-0.3362887763  
C,0,-0.4968566309,-0.209143183,-1.3900712938  
C,0,0.5329752835,-0.9856861418,-1.8123422396  
Cl,0,-0.9723946125,2.4133419387,-0.9348801938  
H,0,1.2046473847,1.7440529209,0.9277794735  
H,0,-0.9918397721,0.5557766823,0.514209375  
H,0,-1.4757544022,-0.3046643227,-1.831414281  
H,0,0.3683315477,-1.7372624346,-2.56302326  
Cl,0,-2.3552237901,-0.1185916485,2.2353716328  
Cl,0,-2.115324266,-2.3766920973,0.0658755311  
H,0,-2.877710098,-1.2369503232,1.2478469142  
H,0,3.0502166475,0.2667036618,0.1751849317  
O,0,2.8566619466,-1.5302745423,-1.5383844597  
C,0,2.7726468037,-2.6000642909,-2.5150117646  
H,0,2.0493740509,-3.3420747204,-2.1874850681  
H,0,2.5075485555,-2.1930978016,-3.487559267  
H,0,3.7674739045,-3.0268532925,-2.5430090023



**TS9 (meta)**

C,0,1.5046565524,-1.6932963697,-0.6579989016  
 C,0,2.0148383656,-0.5619041067,0.0482363092  
 C,0,1.2990354624,0.5966201265,0.0608243827  
 C,0,-0.0285092095,0.6436360729,-0.5682540513  
 C,0,-0.4813854059,-0.5343584224,-1.3073367644  
 C,0,0.28991046,-1.6834105574,-1.3116952171  
 Cl,0,-0.275176356,2.1647397443,-1.5438254907  
 H,0,1.6319210599,1.4828639665,0.5758026525  
 H,0,-0.7652949011,0.7772690904,0.2763842657  
 H,0,-1.3755107491,-0.4535612227,-1.9017249007  
 H,0,-0.0510240854,-2.5620697472,-1.8370035479  
 Cl,0,-2.2647945745,0.9817036677,1.8289459661  
 Cl,0,-2.6827602409,-1.6516707758,0.1784738491  
 H,0,-2.5397719643,-0.2798905274,1.1120089898  
 H,0,2.1223913527,-2.5814320006,-0.673050739  
 O,0,3.2121726112,-0.7708290709,0.6313076745  
 C,0,3.8056468031,0.3169111178,1.3497413335  
 H,0,4.7411156221,-0.0666036955,1.7413241448  
 H,0,4.0008305151,1.1578000484,0.6830909211  
 H,0,3.1617816821,0.6316556618,2.1716251238

**TS10**

C,0,-1.8824237528,1.3515660451,-0.5527119902  
 C,0,0.3596050004,1.7903448323,0.2659458584  
 C,0,-0.7930101604,2.1249853425,-0.5664114603  
 C,0,0.4710545867,0.591966822,0.8632999586  
 C,0,-1.9308439465,0.197707703,0.4013919057  
 C,0,-0.5747182808,-0.4413242017,0.6584559505  
 H,0,-2.7581986246,1.5740510379,-1.1430533338  
 H,0,-0.7383237693,0.3166244438,-1.1748426095  
 H,0,1.3555259644,0.331877725,1.4258841135  
 H,0,-2.2474435666,0.5780681637,1.3775482951  
 H,0,-0.6376888256,-1.1526686901,1.471879174  
 Cl,0,-0.0469608146,-1.5479441443,-0.7889791974  
 H,0,1.9119443325,-2.4906913133,0.0706207334  
 Cl,0,-3.2160405146,-1.0045858004,-0.0349348738  
 Cl,0,2.995336631,-2.9674785714,0.598705158  
 O,0,1.3138643619,2.7630042923,0.4197448246  
 C,0,2.4449468376,2.6532758382,-0.4601940116  
 H,0,2.1341005656,2.7314354511,-1.503704389  
 H,0,3.1016562216,3.4817008836,-0.2124411447  
 H,0,2.9661907541,1.7083211406,-0.3040739613

**TS11**

C,0,-1.0402639675,1.610807981,0.3429148328  
 C,0,-2.0643311118,0.966743557,1.1585816839  
 C,0,-2.2209853439,-0.3614344663,1.1518645311  
 C,0,-1.3605965221,-1.2158190941,0.2916325406  
 C,0,-0.0459269249,-0.5674606512,-0.1260470477  
 C,0,-0.0823924475,0.9000257234,-0.2724240401  
 Cl,0,-2.3042247368,-1.6059411479,-1.2713165483  
 H,0,-2.9928561566,-0.84510938,1.7323126442  
 H,0,-1.1845460292,-2.1944312136,0.7194537008  
 H,0,0.3743983705,-1.0721926362,-0.9861962352  
 H,0,0.7013221277,1.3864698875,-0.8335972593  
 Cl,0,4.1772876083,-1.3349213198,-0.8725615552  
 Cl,0,1.2159226489,-1.0090808843,1.2318108066  
 H,0,3.1655361649,-1.2221992243,-0.0731295995  
 H,0,-2.6967478257,1.6069395745,1.7574092653  
 C,0,-1.0743120067,2.9807372922,0.2972872252  
 C,0,-1.6231650267,3.5473975726,-0.9028600937  
 H,0,-1.5737713863,4.6248828367,-0.7777892266  
 H,0,-1.039563657,3.251088358,-1.7749804451  
 H,0,-2.6620349607,3.2398920908,-1.0356287218

**P1**

C,0,0.6662632304,2.0736941768,-0.4569449828  
 C,0,1.3067460012,0.9474295499,-0.9667172252  
 C,0,1.705094053,-0.0870557434,-0.1168129168  
 C,0,1.4437122269,0.0409963226,1.2586528312  
 C,0,0.8047781636,1.1594573,1.7629413469  
 C,0,0.4079257406,2.1855269415,0.9047447478  
 Cl,0,1.9327841928,-1.2394848121,2.3485335652  
 H,0,0.3714197398,2.8638933813,-1.1331156366  
 H,0,-1.5867909116,1.0303805831,0.2639400745  
 H,0,0.6191010143,1.226257098,2.8246027157  
 H,0,-0.077197792,3.064098113,1.3050966322  
 Cl,0,-2.7303529422,0.463213631,0.0463736331  
 Cl,0,-1.950433114,-0.7924654351,-3.3830357668  
 H,0,-2.2218203363,-0.3595376235,-2.1974386114  
 H,0,1.4916297024,0.8763846372,-2.0266042956  
 O,0,2.3278847603,-1.2146484043,-0.5213533137  
 C,0,2.5859938273,-1.391040004,-1.9150624815  
 H,0,1.657777299,-1.3984571317,-2.4874677272  
 H,0,3.2503583614,-0.612507468,-2.2925472206  
 H,0,3.0736635852,-2.3565843137,-1.9994240273

**P2**

C,0,1.6415309214,-1.7304740758,0.7607057383  
 C,0,2.562286082,0.3646707592,0.0107365063  
 C,0,2.5964715784,-0.7366096319,0.8748808185  
 C,0,1.5681826964,0.4566790595,-0.9659250739  
 C,0,0.633727016,-1.6567028322,-0.2058526038  
 C,0,0.6244941369,-0.5601983384,-1.0556068626  
 Cl,0,-0.6187477144,-0.4435342427,-2.294290163  
 H,0,1.6723025568,-2.5804514996,1.4279582713  
 H,0,1.5168351404,1.2908610114,-1.6451194186  
 H,0,-0.0995850332,-2.4413254183,-0.3119282742  
 H,0,-0.6682726085,-0.42129894,1.3596912298  
 Cl,0,-4.8210966276,-0.7361713151,0.9151228766  
 H,0,-3.6384750537,-0.416039008,1.3186272999  
 Cl,0,-1.4261345513,0.195423262,2.2082797135  
 H,0,3.3745916952,-0.7887775057,1.6220112164  
 O,0,3.532463982,1.293956888,0.1938769505  
 C,0,3.5470106846,2.4461324853,-0.6485059534  
 H,0,2.6291506321,3.0252648766,-0.5370924233  
 H,0,4.3928453061,3.0402656665,-0.3182619071  
 H,0,3.6841791603,2.1670987991,-1.694313463

**P3**

C,0,2.0964225781,0.3344393049,0.4220497311  
 C,0,1.7427094616,1.4000376444,1.2586401849  
 C,0,0.6720054179,2.2179271702,0.9437188418  
 C,0,-0.0584852852,1.976035064,-0.2171701024  
 C,0,0.2782606025,0.9245501357,-1.0554843918  
 C,0,1.3583487017,0.0983023916,-0.7380537888  
 Cl,0,-1.4119983513,3.0235029495,-0.62728687  
 H,0,0.4047177688,3.0383632935,1.5925576006  
 H,0,-1.1669101558,-0.3538719697,0.480822564  
 H,0,-0.2844506668,0.7494558029,-1.9604980776  
 H,0,1.6046134329,-0.7143646214,-1.4027332876  
 Cl,0,-1.9399083802,-1.205745645,1.0672112699  
 Cl,0,-0.6794571225,-4.025771807,-1.0224044631  
 H,0,-1.1572682349,-3.0850123803,-0.2788047873  
 H,0,2.3198519549,1.5712891629,2.1558228942  
 O,0,3.1621898914,-0.4056877644,0.823492708  
 C,0,3.5696924217,-1.5063705325,0.0118887246  
 H,0,2.775440781,-2.2497375473,-0.0714177892  
 H,0,3.8680055769,-1.1720582298,-0.9832353154  
 H,0,4.424188272,-1.9445957867,0.5173063517

**P5'**

C,0,-1.5191810712,0.7171707314,0.3303496722  
 C,0,-2.5291025728,-1.3526555906,-0.5164088123  
 C,0,-2.5877546208,0.0702771634,-0.1877877501  
 C,0,-1.5174916156,-2.1051649666,-0.0816089158  
 C,0,-0.2515915998,-0.0138776084,0.531409285  
 C,0,-0.4940499655,-1.4864763627,0.8195910436  
 Cl,0,1.0301211272,-2.4655343732,0.9051537776  
 H,0,-1.515297854,1.7812977031,0.4990495731  
 H,0,-3.3312297478,-1.7617634327,-1.1136604709  
 H,0,-1.4497004335,-3.159995515,-0.2995791766  
 H,0,0.3773154276,0.4261467269,1.2941884943  
 H,0,-0.8782295956,-1.5124756259,1.8434724939  
 Cl,0,3.840170928,1.6422191155,0.3756679902  
 H,0,2.7977373406,1.080174048,-0.154764487  
 Cl,0,0.8423506607,0.2070275756,-1.0268508853  
 O,0,-3.782085435,0.620974045,-0.4844077776  
 C,0,-3.9564223129,2.0198370254,-0.2473184424  
 H,0,-3.2556650378,2.6028199444,-0.8456533261  
 H,0,-4.9741075618,2.245992309,-0.5410603064  
 H,0,-3.8220748201,2.2510477755,0.8102376282

**P5''**

C,0,1.7913723424,0.5717806462,0.6216914026  
 C,0,-0.0210179175,2.0314505499,-0.0641314457  
 C,0,1.1598354006,1.7428014067,0.7497331736  
 C,0,-0.6487600053,1.045457691,-0.7446581652  
 C,0,1.3299807663,-0.3913152371,-0.425700659  
 C,0,-0.1696326438,-0.3422542835,-0.6586918549  
 H,0,2.6591765313,0.3230215694,1.2132102198  
 H,0,1.5065940055,2.4693805215,1.4678405207  
 H,0,-1.5720606815,1.2502621324,-1.2650571641  
 H,0,1.7695840553,-0.0922034725,-1.3822626902  
 H,0,-0.4482296545,-0.9480598561,-0.5107239731  
 Cl,0,-1.1100418173,-1.2467936105,0.7590214865  
 H,0,-2.1008590488,-2.9872368627,-0.3839674405  
 Cl,0,1.9717338088,-2.0640550518,-0.1534536309  
 Cl,0,-2.6717784259,-3.9073805768,-1.1001226376  
 O,0,-0.5546087166,3.2745023477,-0.1139426373  
 C,0,0.1776004857,4.3873825057,0.4101292198  
 H,0,1.1791432682,4.4383679712,-0.0169924854  
 H,0,-0.3857261522,5.2669104013,0.1155310635  
 H,0,0.2354279462,4.3481961161,1.4978916951

**P5 (meta)**

C,0,-1.9651994944,-0.7710000595,0.4942535533  
C,0,-2.0637673607,1.5656100863,-0.196841993  
C,0,-2.6261337375,0.2178130721,-0.1325616764  
C,0,-0.7870562499,1.8030379464,0.1215642895  
C,0,-0.6962719323,-0.4192463083,1.2078429695  
C,0,0.1093967254,0.6874221663,0.5439627475  
H,0,-2.3465885858,-1.7729508145,0.5910854469  
H,0,-2.7101281298,2.3557434281,-0.5524084986  
H,0,-0.3523925228,2.785425894,0.0095288163  
H,0,-0.9285718136,-0.0313073984,2.2040888129  
H,0,0.9141233366,1.0130483684,1.1914266847  
Cl,0,1.0175405606,0.0934594983,-0.9864008531  
H,0,3.2612229417,0.4885705779,-0.4117212278  
Cl,0,0.3087751648,-1.8941129003,1.5620814242  
Cl,0,4.4659292607,0.8003113852,-0.0533022556  
O,0,-3.8280327629,0.1236973599,-0.7524998887  
C,0,-4.4580715063,-1.1563158143,-0.7714539602  
H,0,-3.831059905,-1.8883977079,-1.2827595064  
H,0,-4.6697245721,-1.4990562634,0.2429481817  
H,0,-5.3873691279,-1.023997734,-1.3156990134

**P6**

C,0,2.1628259384,-0.2796695873,0.0393443648  
C,0,2.1781096555,2.0370958772,0.747172917  
C,0,2.8466085485,0.8701650085,0.2045441447  
C,0,0.8463203198,2.1047552602,0.9029117191  
C,0,0.7314378346,-0.3765075668,0.4569267603  
C,0,0.005334409,0.9605997272,0.4986589512  
H,0,2.7920741795,2.88581072,1.0168354412  
H,0,3.893136162,0.9419774876,-0.0448434023  
H,0,0.3590091408,2.9925958353,1.275587547  
H,0,0.197034917,-1.1013952854,-0.1436887737  
H,0,-0.9169758273,0.8756045553,1.0582274294  
Cl,0,-0.6327628329,1.2712265797,-1.2701794991  
H,0,-2.8236667488,0.4248291004,-1.2189794659  
Cl,0,0.675909618,-1.0830148904,2.1701852353  
Cl,0,-4.0291729925,-0.0422518817,-1.1420540234  
O,0,2.6223984435,-1.4472112286,-0.4452139084  
C,0,3.9995655599,-1.517848989,-0.821979159  
H,0,4.6426482056,-1.3187549832,0.0360822782  
H,0,4.1580298445,-2.5309876243,-1.1753623332  
H,0,4.2161946251,-0.8079181149,-1.6211222231

**P6 (meta)**

C,0,-1.8130747069,-2.220844459,0.2808455697  
C,0,-3.1515303639,-0.1769398901,0.2703934687  
C,0,-2.9842133371,-1.5984274073,0.4850102299  
C,0,-2.0900546136,0.6264268737,0.0671982404  
C,0,-0.6499666989,-1.4458059383,-0.2020997161  
C,0,-0.7146351293,0.0511408399,0.0823165712  
H,0,-1.6985524661,-3.2862452762,0.409422772  
H,0,-4.1402103728,0.2573579718,0.301371249  
H,0,-3.8482449214,-2.1654521321,0.8036286974  
H,0,0.3006123615,-1.8456127747,0.1271738036  
H,0,-0.0177034784,0.5789043866,-0.5535610756  
Cl,0,-0.0046046738,0.3267366056,1.8048765819  
H,0,2.2368674695,1.0384567459,1.3936012429  
Cl,0,-0.53253592,-1.6102489034,-2.0737867687  
Cl,0,3.4215896289,1.4514746362,1.0817187538  
O,0,-2.27749937,1.9641541212,-0.0390288602  
C,0,-1.2502153273,2.7893480026,-0.6023342134  
H,0,-0.3636756179,2.8123608154,0.0304663013  
H,0,-0.9906843151,2.460209975,-1.6090717871  
H,0,-1.6774627595,3.7856030314,-0.6506271074

**P7**

C,0,-1.823177872,0.8279398663,0.1408347907  
C,0,-2.3653251711,-0.0636482025,1.1619121051  
C,0,-1.8639043302,-1.2863550745,1.3489600562  
C,0,-0.7357663749,-1.7774611933,0.5144540936  
C,0,0.0663337359,-0.6747213755,-0.1602005619  
C,0,-0.6757442168,0.5383281523,-0.5117136339  
Cl,0,-1.4378539669,-2.8594224771,-0.8325434867  
H,0,-2.2837826926,-1.9627066427,2.0788071358  
H,0,-0.0843966445,-2.4530028141,1.0534167984  
H,0,0.6660623686,-1.0670875278,-0.9699147165  
H,0,-0.2474292468,1.1976466264,-1.248152424  
Cl,0,3.4204629207,2.0099317856,-0.9419539344  
Cl,0,1.4645849711,-0.2320279836,1.115588798  
H,0,2.7536346906,1.2122099731,-0.1663298882  
H,0,-3.202401361,0.3006063199,1.740219739  
O,0,-2.5902610015,1.9192469465,-0.0480184713  
C,0,-2.1678862784,2.8783905062,-1.0213444525  
H,0,-2.9180285557,3.6617749463,-1.0086770219  
H,0,-1.1943752791,3.2922494336,-0.7572651161  
H,0,-2.1217136231,2.4254596873,-2.0122579798

**P7'**

C,0,-1.431014795,1.0438222315,-0.2608144227  
C,0,-2.2733440555,0.1617363592,0.5438950389  
C,0,-1.9166049099,-1.1064040819,0.7754773189  
C,0,-0.6560182651,-1.6597213071,0.2162319388  
C,0,0.3654391044,-0.6012642936,-0.1655837602  
C,0,-0.1788136411,0.675104932,-0.6123819852  
Cl,0,-1.0798134017,-2.6154051095,-1.3269899062  
H,0,-2.5479275655,-1.7690909488,1.3489360783  
H,0,-0.214944649,-2.4121571909,0.8567409735  
H,0,1.1297526889,-1.0048629582,-0.8152741696  
H,0,0.4465509248,1.3481520629,-1.1786124057  
Cl,0,4.2703091417,1.3619103531,0.0309639316  
Cl,0,1.4164244306,-0.331987679,1.4619174703  
H,0,3.2531772466,0.7718367638,0.5787650222  
H,0,-3.1981612305,0.5392598849,0.9513021399  
O,0,-1.8662381169,2.2621367088,-0.6555052624  
C,0,-3.2421530859,2.6229691354,-0.4929355286  
H,0,-3.3511408009,3.5740229664,-1.003952797  
H,0,-3.9016534752,1.8872090206,-0.935295959  
H,0,-3.4966151519,2.7515412362,0.5591602252

**P7 (meta)**

C,0,-2.032656982,0.3297119905,-0.5472077987  
C,0,-1.3616408625,-1.3116271803,1.1438840564  
C,0,-2.3351619586,-0.738431367,0.2186665553  
C,0,-0.0804369976,-0.9365588132,1.1244072275  
C,0,-0.708890281,0.9642919067,-0.4216661116  
C,0,0.3899133957,0.0780218367,0.1486105277  
H,0,-2.7468374103,0.7868482293,-1.2116498268  
H,0,-1.7194720338,-2.0655885354,1.8305745614  
H,0,0.6483573301,-1.380062203,1.7865598401  
H,0,-0.3804892894,1.4364758559,-1.3381812174  
H,0,1.2127832395,0.6736255581,0.5214275178  
Cl,0,4.7400811584,-0.5676120582,-0.5102590029  
H,0,3.4905849107,-0.682848934,-0.8241374806  
Cl,0,-0.8212475168,2.4566093703,0.7510977879  
Cl,0,1.1727385712,-0.838365753,-1.3009082796  
O,0,-3.514977588,-1.3952940328,0.2441254403  
C,0,-4.5596762959,-0.9264388608,-0.6099189443  
H,0,-4.8306991073,0.1002245928,-0.3606402063  
H,0,-4.2575453957,-0.9851433353,-1.6564175543  
H,0,-5.4044639631,-1.5837756448,-0.4335131397



**TS4**

C,0,2.1715045062,-0.1134006942,-0.2770597407  
 C,0,2.2642725567,1.9491043359,0.9505148513  
 C,0,2.8240945716,0.7089158565,0.6390176775  
 C,0,1.0482290043,2.4212269768,0.3962141495  
 C,0,0.8511187853,0.2874442242,-0.8529582792  
 C,0,0.3507714372,1.6347287004,-0.4742561545  
 H,0,2.7949156503,2.5866376567,1.6593885677  
 H,0,3.7622207775,0.4064328606,1.09741044  
 H,0,0.6593998329,3.3932862852,0.6921693079  
 H,0,0.8518252579,0.1493141295,-1.9437637704  
 H,0,-0.6000838272,1.9485414497,-0.899788227  
 Cl,0,-2.4665316981,1.7044562166,1.0704694128  
 H,0,-2.8457538291,0.0753979656,1.1327741466  
 Cl,0,-0.4120069737,-0.8987924831,-0.2259308455  
 Cl,0,-3.1489059251,-1.3888616889,1.1701078907  
 O,0,2.6118728371,-1.2704160777,-0.7253306331  
 C,0,3.8404628659,-1.822562923,-0.1845445592  
 H,0,3.7370342495,-1.9721711844,0.8969227664  
 H,0,3.9644769458,-2.7816745413,-0.6912626415  
 H,0,4.6830247391,-1.157523894,-0.4110222443

**TS4 (meta)**

C,0,-1.799222267,-2.215657211,0.3670073939  
 C,0,-3.1796989139,-0.4137223304,-0.4337360797  
 C,0,-2.9895300102,-1.7816186858,-0.1646210939  
 C,0,-2.1930607638,0.5718579859,-0.1632122723  
 C,0,-0.7411374395,-1.2443005508,0.6651754595  
 C,0,-0.9606296394,0.1674034666,0.3263621189  
 H,0,-1.614338701,-3.263382862,0.598689081  
 H,0,-4.1116923604,-0.0760876734,-0.8909144184  
 H,0,-3.7879543286,-2.485716717,-0.394013718  
 H,0,-0.5394183847,-1.2966706197,1.7572285638  
 H,0,-0.1081553612,0.8467452558,0.4823900786  
 Cl,0,1.9314137146,0.8586726791,0.9862710502  
 H,0,2.8374131673,0.7528640268,0.2107619466  
 Cl,0,0.8680803008,-1.8003468824,-0.0437345106  
 Cl,0,3.6882076719,-0.2706936249,-0.5235807266  
 O,0,-2.5395832591,1.8332526152,-0.4755193071  
 C,0,-1.5358378055,2.8570279254,-0.2709538824  
 H,0,-1.2443181674,2.9048548975,0.7868337521  
 H,0,-0.6485164742,2.6590767273,-0.8863250564  
 H,0,-2.0126179784,3.7912355777,-0.5768413793

**TS5**

C,0,-1.6872238921,0.6617867759,0.6843921559  
 C,0,-2.407938397,-1.468180302,-0.4008993233  
 C,0,-2.5755077342,-0.0632870959,-0.1608719892  
 C,0,-1.3663842476,-2.1270224748,0.1646563727  
 C,0,-0.634697838,0.0115770799,1.2554657374  
 C,0,-0.3863851119,-1.4266850411,1.0169400971  
 Cl,0,1.259277328,-1.5017521105,0.1529975908  
 H,0,-1.8170758464,1.7290068351,0.8442276768  
 H,0,-3.1223979488,-1.9631903784,-1.0567359387  
 H,0,-1.2060625278,-3.1888219153,-0.0191281053  
 H,0,0.0784172096,0.5532996894,1.87514668  
 H,0,-0.2060695118,-1.9630474541,1.9605874168  
 Cl,0,3.7465611143,-0.0669205582,-0.8821032465  
 H,0,2.7933286939,0.9885969562,-0.304077548  
 Cl,0,1.7573955615,2.0713620719,0.3160768557  
 O,0,-3.5990685666,0.4795131978,-0.7885030075  
 C,0,-3.8569866288,1.9074192581,-0.6703362294  
 H,0,-3.0044494271,2.4738777376,-1.061824029  
 H,0,-4.744119518,2.0797886381,-1.2828996752  
 H,0,-4.0578787114,2.1676630901,0.3753685088

**TS5 (meta)**

C,0,-1.7881285437,-0.6009336961,0.6085283215  
 C,0,-2.1547111437,1.6128275441,-0.2984390803  
 C,0,-2.541434643,0.2468740204,-0.1768114869  
 C,0,-1.0183631956,2.1322138807,0.3266596305  
 C,0,-0.5858589375,-0.1006483282,1.2802099371  
 C,0,-0.2075968096,1.3045549381,1.0787252665  
 H,0,-2.0423120882,-1.6486157615,0.7496749689  
 H,0,-2.7817880671,2.2555644712,-0.9181252593  
 H,0,-0.7577752656,3.1800151631,0.1884943905  
 H,0,-0.6439966968,-0.2961716114,2.3682099338  
 H,0,0.6858506968,1.6722472391,1.576975761  
 Cl,0,2.2762782339,1.4023587212,-0.7903695253  
 H,0,2.8998386634,-0.0132037195,-0.6281740989  
 Cl,0,0.8897768686,-1.1790699644,0.8475803237  
 Cl,0,3.4619483895,-1.5004567549,-0.41248104  
 O,0,-3.6555259306,-0.0845085109,-0.8683682333  
 C,0,-4.0748734433,-1.4596497726,-0.8137655868  
 H,0,-3.2881580018,-2.1213768011,-1.203583512  
 H,0,-4.3352334707,-1.7475394051,0.215390647  
 H,0,-4.961164615,-1.520509652,-1.4503693575

**TS6**

C,0,-2.1621850698,-0.3165068914,-0.0585847522  
 C,0,-0.7082220543,-2.0290139714,0.8028650063  
 C,0,-1.9974403963,-1.5153568354,0.6248862785  
 C,0,0.4615990138,-1.3942313445,0.3212729172  
 C,0,-0.9671640948,0.396994141,-0.628584692  
 C,0,0.3610567642,-0.2052348134,-0.3411249602  
 H,0,-0.6037293194,-2.9652781362,1.3535469093  
 H,0,1.4430192275,-1.8306280128,0.4949384052  
 H,0,-1.0894059009,0.4098869678,-1.7281377046  
 H,0,1.243581921,0.3106024906,-0.7172191778  
 Cl,0,3.2136695236,0.661609458,1.2049405436  
 H,0,3.4304861522,-0.0069210094,-0.1952676463  
 Cl,0,-0.9679519391,2.1430986776,-0.1378971351  
 Cl,0,3.4877678859,-0.6859722752,-1.6094399747  
 H,0,-2.8531392813,-2.0482306945,1.0320171036  
 H,0,-3.6082487766,0.2769396871,-0.3146055351  
 C,0,-4.5436793097,-0.3306914969,0.1475938743  
 H,0,-4.6714576156,-1.3177251545,-0.3134620765  
 H,0,-4.5369119571,-0.4056633891,1.2416580949  
 H,0,-5.3310327735,0.3500616025,-0.1818732785

**TS7**

C,0,-2.0746883617,1.3973929777,-0.5617515289  
 C,0,-1.6631383945,-0.922160958,-0.0177990794  
 C,0,-2.5691940345,0.1732180229,-0.2562357681  
 C,0,-0.2610530423,-0.7525314963,-0.0830263768  
 C,0,-0.6140163361,1.6298137492,-0.6837512122  
 C,0,0.264176502,0.4739354038,-0.372533126  
 H,0,-2.7362656933,2.2460641104,-0.7333475133  
 H,0,0.3986156203,-1.5952526143,0.1185519903  
 H,0,-0.3845069411,1.9669456871,-1.7114641979  
 H,0,1.342383152,0.6095926356,-0.4232713547  
 Cl,0,2.6525225035,-0.423072536,1.6066095749  
 H,0,2.8901716627,-0.8448964894,0.0975994497  
 Cl,0,-0.1554674627,3.0657981645,0.3537229285  
 Cl,0,2.9121064777,-1.1632438858,-1.4223614228  
 H,0,-3.6439381797,0.0214620614,-0.1805972442  
 O,0,-2.0737579577,-2.1473445276,0.288101668  
 C,0,-3.484199668,-2.4405180846,0.4090256151  
 H,0,-3.9326864156,-1.8477333337,-1.2164072712  
 H,0,-3.9996602589,-2.2577269016,-0.5426890459  
 H,0,-3.5289521721,-3.5033439583,0.6584715591

**TS7 (meta)**

C,0,-2.0966154944,0.4527182053,-0.3603861648  
 C,0,-1.0802558294,-1.6370769574,0.3321262249  
 C,0,-2.2434649167,-0.8482301756,0.0639280489  
 C,0,0.2166048447,-1.1460241402,0.1955891658  
 C,0,-0.739676737,0.9824812143,-0.6000994936  
 C,0,0.4180210156,0.1636274497,-0.2037428948  
 H,0,-2.9396098982,1.1028554099,-0.5806490786  
 H,0,-1.2446266028,-2.6608387499,0.6724778741  
 H,0,1.0771064283,-1.7696924486,0.4287940798  
 H,0,-0.6199862686,1.0203778462,-1.7120195436  
 H,0,1.4175204273,0.5814002835,-0.2971845631  
 Cl,0,3.1305776093,0.0395929319,1.6393695745  
 H,0,3.3355161386,-0.4070813502,0.1578320499  
 Cl,0,-0.5692041585,2.7164527027,-0.0999094163  
 Cl,0,3.3463291536,-0.8205058674,-1.3615609223  
 O,0,-3.4111652012,-1.4879926712,0.2846570887  
 C,0,-4.6203224571,-0.736274301,0.0736087732  
 H,0,-4.6534803403,0.1380047842,0.7395027397  
 H,0,-4.7001623269,-0.41671159313,-0.975608239  
 H,0,-5.4365713864,-1.4209032348,0.3165806966

**TS8**

C,0,1.32376798,2.3719982986,-0.7130228013  
 C,0,1.8199257607,1.1123804103,-1.0784846085  
 C,0,1.355772552,-0.0157838952,-0.4160646152  
 C,0,0.3091987984,0.1002586432,0.6438960407  
 C,0,-0.2081693713,1.465633203,0.9015031171  
 C,0,0.3227455372,2.5577839486,0.2565198788  
 Cl,0,0.945119231,-0.5688397542,2.2214093031  
 H,0,1.7396810884,3.2490769592,-1.2112590474  
 H,0,-0.5302907688,-0.5974189354,0.3751554498  
 H,0,-0.9237468816,1.5671159344,1.713270534  
 H,0,-0.0375407608,3.5592095564,0.4826357273  
 Cl,0,-2.242499166,-1.8067110318,-0.2217359979  
 Cl,0,-2.7179872921,1.2769370082,-0.418587144  
 H,0,-2.5668446423,-0.3361053801,-0.3502368885  
 H,0,2.5777483908,1.0348657731,-1.8543200766  
 O,0,1.733314023,-1.2598386379,-0.6435420737  
 C,0,2.709381306,-1.5204041891,-1.6808247548  
 H,0,2.3217383398,-1.1909050776,-2.6527970595  
 H,0,3.6545606864,-1.0150174012,-1.4450024529  
 H,0,2.8463110092,-2.6037494506,-1.6744997032

**TS8 (meta)**

C,0,0.7515512044,-1.8302354131,1.8341742496  
 C,0,1.8498941742,-1.0417492797,1.4034814416  
 C,0,1.7889714307,-0.2160068874,0.2753600888  
 C,0,0.5971143962,-0.1657534874,-0.4645551861  
 C,0,-0.5438065152,-1.0193231596,-0.0836614319  
 C,0,-0.4008910886,-1.8734577262,1.1051424227  
 Cl,0,-1.107814274,-1.9895349449,-1.5304897844  
 H,0,0.8557582715,-2.4263148448,2.7398898346  
 H,0,0.5491650299,0.3202049779,-1.4342491836  
 H,0,-1.4402469783,-0.3509303402,0.1051896635  
 H,0,-1.250316655,-2.4895663243,1.3942538479  
 Cl,0,-0.1322733604,2.3215174764,0.2779264073  
 Cl,0,-3.0273806764,1.0941181883,0.2521794917  
 H,0,-1.7420316917,1.767772185,0.2785073734  
 H,0,2.7912306595,-1.0781301458,1.9531287636  
 O,0,2.9157305697,0.4635844984,-0.0299399086  
 C,0,2.940809142,1.218331821,-1.2597932843  
 H,0,3.9316752386,1.6790154908,-1.2916283375  
 H,0,2.8174893593,0.5497718413,-2.1243295005  
 H,0,2.1656467634,1.9949820741,-1.2557579678

**TS9**

C,0,2.1521165418,0.1102854214,0.3792533727  
 C,0,1.5283197891,0.9858895874,1.3379666227  
 C,0,0.2749963539,1.4428798264,1.1189763104  
 C,0,-0.5052129126,1.0099059843,-0.0587223316  
 C,0,0.1808553917,0.090775646,-0.9934711165  
 C,0,1.4781327597,-0.3138657364,-0.7845794133  
 Cl,0,-1.0717280647,2.4833086225,-0.9960878113  
 H,0,-0.2106731763,2.1192933677,1.8213027015  
 H,0,-1.4694692789,0.5508370323,0.2901118401  
 H,0,-0.3356864317,-0.1572916372,-1.9168806976  
 H,0,1.9609793307,-0.9715240298,-1.5025990913  
 Cl,0,-3.3250144964,-0.5069795456,0.8609491384  
 Cl,0,-1.1687757309,-2.345347232,-0.4817901915  
 H,0,-2.3613756369,-1.4552875381,0.2366618608  
 H,0,2.1036798926,1.2684446676,2.2184503184  
 O,0,3.3926260734,-0.2326843783,0.6922870065  
 C,0,4.1320154629,-1.1271010795,-0.178814801  
 H,0,3.6017543623,-2.0818959976,-0.2757844402  
 H,0,4.2817163122,-0.6606001908,-1.160043522  
 H,0,5.092214458,-1.27464479,0.3200822448

**TS9 (meta)**

C,0,1.5535470658,-1.6984334349,-0.6721492799  
 C,0,2.0233180382,-0.5815079797,0.0941671826  
 C,0,1.2885003837,0.5764124516,0.1315816822  
 C,0,-0.0218760521,0.6325204449,-0.5324465859  
 C,0,-0.4692258502,-0.5466257345,-1.2847452051  
 C,0,0.3418876482,-1.6843549551,-1.3361571061  
 Cl,0,-0.2104611931,2.1422842132,-1.5525826399  
 H,0,1.6044428014,1.4559245093,0.6869396499  
 H,0,-0.794242529,0.8271965763,0.2901317384  
 H,0,-1.328749305,-0.4381009493,-1.9397459536  
 H,0,0.0243681288,-2.5493587063,-1.9156387721  
 Cl,0,-2.3330450841,1.0853171586,1.6646633795  
 Cl,0,-2.4751663469,-1.6420918598,0.148156078  
 H,0,-2.4949442961,-0.2431679251,1.0071853721  
 H,0,2.2017558048,-2.5742753208,-0.7243375427  
 O,0,3.2145197622,-0.7954805382,0.7047973272  
 C,0,3.7571856471,0.2946392398,1.4673631035  
 H,0,4.7002543384,-0.0747192622,1.8786746384  
 H,0,3.9458984365,1.1653857065,0.8222710128  
 H,0,3.0767166011,0.578113656,2.2852179206

**TS10**

C,0,-1.0432809132,1.9861060656,0.2021408238  
 C,0,-2.2691556404,-0.0103306035,-0.4594429659  
 C,0,-2.2010776857,1.2974493966,0.1845973567  
 C,0,-1.1492417595,-0.6796730885,-0.8281546085  
 C,0,0.1336479187,1.4233639963,-0.5346280779  
 C,0,0.1859234899,-0.0982112584,-0.5477334077  
 H,0,-0.9545309696,2.9709092045,0.6573395366  
 H,0,-3.1113613887,1.6994900738,0.6294431318  
 H,0,-1.2098343,-1.6862228051,-1.2396067132  
 H,0,0.0292048262,1.7020347559,-1.5998215438  
 H,0,0.9660465091,-0.4511541147,-1.2266140593  
 Cl,0,0.7826368064,-0.7829477877,1.1240059774  
 H,0,2.7286833189,-1.5496031645,0.4720952953  
 Cl,0,1.696402932,2.1810674645,-0.0303600111  
 Cl,0,3.8442118078,-2.0351745478,-0.026617791  
 O,0,-3.5243275101,-0.5299799575,-0.6885261012  
 C,0,-3.9758827595,-1.4497857793,0.3267835441  
 H,0,-4.0527299097,-0.9496709202,1.3047330576  
 H,0,-4.9668707707,-1.7894902364,0.009298971  
 H,0,-3.2943620021,-2.3096336937,0.4075465853

**TS11**

C,0,2.0792244744,-0.401405837,0.0560541789  
 C,0,1.8629454132,0.2073372501,1.3633311204  
 C,0,0.680114859,0.7705734558,1.6825065761  
 C,0,-0.4270726853,0.7993364784,0.6890819166  
 C,0,-0.3175138002,-0.25157806633,-0.4122698892  
 C,0,1.055295537,-0.6223023404,-0.8024073622  
 Cl,0,-0.403636231,2.4629807621,-0.1479595217  
 H,0,0.5166257143,1.2540619486,2.6446463793  
 H,0,-1.4148609238,0.7672564952,1.1557326841  
 H,0,-0.9571575286,0.0052551595,-1.2602072661  
 H,0,1.2189333874,-1.1251126729,-1.7540440346  
 Cl,0,-4.4856875242,-0.8707224318,-0.4950506983  
 Cl,0,-1.1809290091,-1.8157557085,0.2624589208  
 H,0,-3.2739030617,-1.2789798353,-0.1950209782  
 H,0,2.6982217535,0.201622724,2.0637378539  
 O,0,3.3648593926,-0.8047099963,-0.2297636729  
 C,0,4.1013053117,0.0972837807,-1.0797456106  
 H,0,5.0896248545,-0.3535976912,-1.2151254008  
 H,0,3.6075053582,0.2089647023,-2.0563715099  
 H,0,4.206574708,1.0851968201,-0.6054806777

**P1**

C,0,-0.7008648696,0.5809887098,0.3270724073  
 C,0,-1.504064315,-1.7061132912,0.4900623483  
 C,0,-1.3477424938,-0.4307237854,1.043412431  
 C,0,-1.0207591275,-1.9603043371,-0.8022584227  
 C,0,-0.2050053836,0.3348062926,-0.9630014512  
 C,0,-0.3812578901,-0.954935357,-1.517418397  
 Cl,0,0.2250197418,-1.2814588309,-3.1222698189  
 H,0,-0.5740667757,1.5619017358,0.7792504037  
 H,0,-2.0198528499,-2.4928202653,1.0396710354  
 H,0,-1.136258576,-2.942813889,-1.2572515917  
 H,0,0.491323709,-1.9186440045,1.4089508954  
 Cl,0,2.6473644227,1.2142775053,-2.043248233  
 H,0,2.2866831544,-0.0245564926,2.2263232491  
 Cl,0,1.6769490075,-2.2044034225,1.9005746551  
 H,0,-1.7263207478,-0.2168620776,2.0428786596  
 O,0,0.4420899809,1.2460713027,-1.7285133406  
 C,0,0.6622322717,2.5493437696,-1.1679307696  
 H,0,-0.2917745346,3.0540612102,-0.3953564092  
 H,0,1.2678816884,2.4868648078,-0.2521935816  
 H,0,1.2084236208,3.1053204268,-1.9352470969

**P2**

C,0,-1.2303658982,2.3197336658,0.1302700972  
 C,0,-1.7590336421,-0.0344999603,-0.0728716383  
 C,0,-2.1407808333,1.2773803866,0.260404052  
 C,0,-0.4590553753,-0.2903881912,-0.5369050013  
 C,0,0.0741125073,2.0912935711,-0.3299002229  
 C,0,0.4223296933,0.7855047197,-0.6512085977  
 Cl,0,2.0605249433,0.4572939034,-1.2389544051  
 H,0,-1.53310533,3.3338557027,0.3905648511  
 H,0,-0.1307845981,-1.2908964026,-0.8044008747  
 H,0,0.7906242132,2.9028628208,-0.4333917753  
 H,0,3.0058648124,-0.002939626,0.6839496521  
 Cl,0,6.813795286,-0.731592121,0.3650611347  
 H,0,5.6424869849,-0.571048042,0.9225609618  
 Cl,0,3.5704043448,-0.2879865842,1.8381800594  
 H,0,-3.1545195179,1.452680174,0.6182030376  
 O,0,-2.7145477189,-0.9937016439,0.085070777  
 C,0,-2.3651419325,-2.342589639,-0.2476376783  
 H,0,-1.5364612592,-2.7055209438,0.3789883046  
 H,0,-3.2614494037,-2.936886808,-0.0473184802  
 H,0,-2.0948972714,-2.4325549863,-1.3106705484

**P3**

C,0,-1.137380242,-0.4885482142,-0.8211986452  
 C,0,-1.0748177812,-0.0743272282,1.5718075311  
 C,0,-1.7932453334,-0.1221222956,0.3638978294  
 C,0,0.2797456321,-0.3871203192,1.5987919754  
 C,0,0.2256721192,-0.8032902458,-0.7947194273  
 C,0,0.9170464573,-0.7495644316,0.4100097451  
 Cl,0,2.6381432685,-1.1544167178,0.4416909628  
 H,0,-1.6692374456,-0.5338180693,-1.7688573515  
 H,0,-1.5963178264,0.2123418781,2.4843715879  
 H,0,0.835594311,-0.35024036,2.5340762456  
 H,0,0.7379588194,-1.0887441194,-1.7119825297  
 H,0,3.4848429585,0.8190014702,0.0915205475  
 Cl,0,7.313571097,0.661423608,-0.4578278093  
 H,0,6.1184891205,1.179144906,-0.3392672024  
 Cl,0,4.0095770881,2.0089508231,-0.1226635545  
 O,0,-3.1158744163,0.2036180971,0.4481848211  
 C,0,-3.8834252799,0.1687973847,-0.7602201887  
 H,0,-3.9007719527,-0.84359010253,-1.1912559556  
 H,0,-4.8980635614,0.4610318004,-0.473878014  
 H,0,-3.4915070387,0.8813830596,-1.5017805713

**P4**

C,0,-0.8449295981,-0.4463909089,0.1242682631  
C,0,-0.6164070658,1.9077607554,-0.4258903512  
C,0,-1.3442173465,0.6609493582,-0.4941153249  
C,0,0.6616107704,1.988887529,0.0244518679  
C,0,0.3881650168,-0.2789979574,0.9859588313  
C,0,1.3621990338,0.7560277436,0.4434525628  
H,0,-1.1145986107,2.8074238552,-0.7898997477  
H,0,-2.2915813591,0.6288171348,-1.0270512198  
H,0,1.2232167373,2.9206199961,-0.0060771851  
H,0,0.0449685866,0.146506021,1.9464525962  
H,0,2.1744894912,0.9201647106,1.1553813578  
Cl,0,2.299679933,0.053033736,-1.0669818428  
H,0,4.2250199468,-0.3742988562,-0.1311926692  
Cl,0,1.1915428605,-1.8249183407,1.4338348869  
Cl,0,5.3862871206,-0.5380678308,0.4661843397  
O,0,-1.3884300426,-1.6731682093,0.1602006491  
C,0,-2.6125104003,-1.8649139335,-0.56846865  
H,0,-2.4638353777,-1.6462608333,-1.6353738929  
H,0,-2.8718093918,-2.918289916,-0.4333507239  
H,0,-3.4088603157,-1.224883981,-0.1617837456

**P5'**

C,0,-1.4047641406,2.1286403012,0.2582971585  
C,0,-2.1172092297,-0.1901426771,0.0694414547  
C,0,-2.2541733516,1.1532984037,0.6250936338  
C,0,-1.0028472191,-0.5602752126,-0.6288364216  
C,0,-0.3796603603,1.8328124257,-0.7931862388  
C,0,0.107477297,0.3939057855,-0.7742362736  
H,0,-1.4831240492,3.1430164279,0.6448827123  
H,0,-3.0618763643,1.3293584499,1.3350053051  
H,0,-0.8454197373,-1.5813763092,-0.9658605336  
H,0,-0.8591363,1.951057568,-1.7819752728  
H,0,0.760322816,0.1865201623,-1.6241794403  
Cl,0,1.3585362576,0.1501825943,0.6912928954  
H,0,1.1957030306,-1.9875621625,0.9513093163  
Cl,0,0.9635048336,3.047306559,-0.8103057275  
Cl,0,1.0952854564,-3.2986917016,1.0778634135  
O,0,-3.1742691338,-0.9840370713,0.3545952758  
C,0,-3.1087086695,-2.3498458137,-0.090083063  
H,0,-2.2460946641,-2.8624835704,0.3588959416  
H,0,-4.039155055,-2.8144425939,0.2473850483  
H,0,-3.0427784996,-2.3969356879,-1.1869666809

**P5' (meta)**

C,0,-0.4876501081,-0.8540561047,0.31585989  
C,0,-0.9453872454,1.506817168,-0.1402107468  
C,0,-1.3118780553,0.094128026,-0.1961489666  
C,0,0.3072364912,1.8950615047,0.172701987  
C,0,0.7466768504,-0.3902741859,1.0254139919  
C,0,1.3630201125,0.8798711131,0.4558633329  
H,0,-0.7268585638,-1.9130503078,0.3309399064  
H,0,-1.712975305,2.2348391237,-0.4037505641  
H,0,0.5996767847,2.943698204,0.1436258586  
H,0,0.4981031833,-0.1271878759,2.0700160445  
H,0,2.1567630102,1.2508692949,1.1092301489  
Cl,0,2.269754793,0.5654146982,-1.1614642873  
H,0,4.350379462,0.3509096251,-0.4186293497  
Cl,0,1.9651753367,-1.7243909816,1.2061926418  
Cl,0,5.579680131,0.3226362475,0.0402614228  
O,0,-2.5194434951,-0.1136655395,-0.7909753185  
C,0,-2.9425889685,-1.4771268791,-0.9112961484  
H,0,-2.2215529329,-2.0585377839,-1.5055747116  
H,0,-3.059450287,-1.9389467457,0.0810771971  
H,0,-3.9086811953,-1.4470106046,-1.4231323182

**P5' '**

C,0,-1.3514030175,1.449527107,0.5736848129  
C,0,-2.1502601507,-0.7288579495,-0.156224352  
C,0,-2.2884751174,0.4838339297,0.6466810677  
C,0,-0.9669928339,-1.0284016658,-0.7709808523  
C,0,-0.2308517075,1.2990112878,-0.4060769922  
C,0,0.1911459316,-0.1447501434,-0.6164174235  
H,0,-1.4168192568,2.3624409108,1.1627826817  
H,0,-3.1381422085,0.598287374,1.316936573  
H,0,-0.844438899,-1.9847012762,-1.2763171734  
H,0,-0.6011661965,1.6219568887,-1.3967878804  
H,0,0.926707677,-0.2302709744,-1.4188912503  
Cl,0,1.2581656389,-0.7542462618,0.8991082459  
H,0,3.1500986996,-0.806043018,-0.1104614934  
Cl,0,1.1467629603,2.4170302654,-0.0596756833  
Cl,0,4.2540303947,-0.8567281823,-0.8331819887  
O,0,-3.1647194235,-1.6227097774,-0.2797209931  
C,0,-4.4581845833,-1.2916721056,0.2540626119  
H,0,-4.8188927592,-0.3310285908,-0.1390233787  
H,0,-5.12081041,-2.0948529909,-0.0812495875  
H,0,-4.4438573652,-1.2705824705,1.3528732535

**P6**

C,0,-1.0270064519,0.2876798505,-0.1502783662  
C,0,0.3380780312,-1.1202038787,1.2827421602  
C,0,-0.8977653766,-0.8536007129,0.579197072  
C,0,1.4651528402,-0.3931000858,1.0873913556  
C,0,0.0780455929,1.2949130827,-0.1809181053  
C,0,1.4546534682,0.709684156,0.1102072225  
H,0,0.3529070094,-1.951573002,1.9819311069  
H,0,2.3981198738,-0.6314572949,1.5942452389  
H,0,0.072735627,1.8646085597,-1.1136413303  
H,0,2.1755442545,1.5038572029,0.3164083899  
Cl,0,5.3343398659,-0.7120589116,-0.489169806  
H,0,4.1297045037,-0.4475306661,-0.9411040939  
Cl,0,-0.2564871331,2.5563200703,1.1308268367  
Cl,0,2.0759655356,0.0505929196,-1.5810515538  
H,0,-1.7145885718,-1.5668848803,0.6622213758  
O,0,-0.1002717355,0.6933552007,-0.862214531  
C,0,-3.2496541791,-0.168037954,-0.8508461145  
H,0,-2.9994442226,-1.1507685652,-0.17326018456  
H,0,-3.6315097294,-0.2894828757,1.276231045  
H,0,-3.9985192006,0.3292720889,-1.4730811955

**P6 (meta)**

C,0,-0.368521551,-1.9324753155,-1.7375605115  
C,0,-1.3627387351,-1.0954643418,-1.1090950918  
C,0,-1.0063375101,-0.1338762492,-0.2149143738  
C,0,0.4362904749,0.0802997199,0.0948917005  
C,0,1.3303569724,-1.128118226,-0.1741873511  
C,0,0.9209360389,-1.961375175,-1.3238929847  
Cl,0,1.2518563347,-2.1577605772,1.4003556259  
H,0,0.6885222192,-2.574573747,-2.5588727083  
H,0,0.6205646481,0.4670038359,1.0996639544  
H,0,2.3777222575,-0.8176749588,-0.206550834  
H,0,1.6588160357,-2.6222855954,-1.7738937736  
Cl,0,1.0529389276,1.4770525745,-0.10164523288  
Cl,0,2.4987693205,3.3085803755,1.6298972677  
H,0,2.0369637016,2.685887391,0.5728091063  
H,0,-2.4145644973,-1.2118396396,-1.3673764431  
O,0,-1.9670699723,0.6720180341,0.3076375215  
C,0,-1.6347139214,1.5623392458,1.3887211143  
H,0,-2.5743927558,2.0588094,1.6473623025  
H,0,-1.2677219616,1.0053650731,2.2627078528  
H,0,-0.9006315874,2.3180881749,1.078749958

**P7'**

C,0,2.3276124225,-0.19809936,0.1534940903  
C,0,2.0599359895,0.3226331582,1.4898368755  
C,0,0.8766283223,0.8876719065,1.7906195218  
C,0,-0.1891096023,1.000080729,0.7580275204  
C,0,-0.0326201241,0.0343555545,-0.4087749693  
C,0,1.3372381932,-0.3201901407,-0.7766037455  
Cl,0,-0.1230834756,2.7215897793,0.05450278  
H,0,0.6830304996,1.312129748,2.774602857  
H,0,-1.1946231098,0.9407866008,1.1813760837  
H,0,-0.6586768463,0.3271594378,-1.2539694658  
H,0,1.5138651659,-0.7356718273,-1.7648115937  
Cl,0,-4.2035121135,-0.5966011925,-0.6845087738  
Cl,0,-0.9715324894,-1.5828449315,0.1652025672  
H,0,-2.9994917857,-1.0151685123,-0.34979262694  
H,0,2.8653936142,0.2582141533,2.2211681682  
O,0,3.6293314664,-0.5242216556,-0.0234963082  
C,0,4.0035508738,-1.0542279101,-1.3049448009  
H,0,5.0771243031,-1.251338978,-1.2414476565  
H,0,3.4614832295,-1.9882602792,-1.5118192424  
H,0,3.8027654015,-0.3221005609,-2.1004585813

**P7' (meta)**

C,0,-0.9039019917,0.7775858579,-0.3560151959  
C,0,-0.0209490294,-1.0879492542,0.9819482514  
C,0,-1.0907769047,-0.4335479191,0.2362046498  
C,0,1.2429110301,-0.6262413566,0.9427453923  
C,0,0.3896433383,1.4650211867,-0.2032898016  
C,0,1.5763104027,0.5663909659,0.1242777969  
H,0,-1.6986636151,1.3002274467,-0.8811476244  
H,0,-0.284321789,-1.9762587646,1.5561387424  
H,0,2.050171481,-1.1294290413,1.4730465041  
H,0,0.6251494425,2.1239012358,-1.0423241447  
H,0,2.4074598163,1.1487281857,0.5284129298  
Cl,0,5.4035369381,-0.9495660433,-0.1608966794  
H,0,4.2673571598,-0.6420408755,-0.7387349265  
Cl,0,0.2966812989,2.7021206745,1.237998789  
Cl,0,2.2695566113,-0.0428446599,-1.52274981  
O,0,-2.2350669192,-1.1628579992,0.225560884  
C,0,-3.3563166391,-0.602386712,-0.4725426118  
H,0,-3.6534092104,0.3575065436,-0.0251767958  
H,0,-3.1193849893,-0.4586934208,-1.5371545896  
H,0,-4.165986434,-1.3296660453,-0.3663017649

P7'

C,0,2.1141749597,-0.4669948813,-0.4174652095  
C,0,2.1561004016,0.3989601521,0.7567000839  
C,0,1.0696253781,1.1023190936,1.1353030267  
C,0,-0.1980888359,1.0194478869,0.3624363353  
C,0,-0.3141305611,-0.2252762963,-0.5032382531  
C,0,0.9296902324,-0.7555665869,-1.0337320516  
Cl,0,-0.2628632335,2.4894320634,-0.77571235  
H,0,1.1029786162,1.7727410668,1.9929838815  
H,0,-1.082474318,1.1466195531,0.9909832713  
H,0,-1.1180934726,-0.1361018283,-1.2360199058  
H,0,0.9080429397,-1.4340844933,-1.8841405433  
Cl,0,-4.4295651278,-0.5803401165,0.3171532895  
Cl,0,-1.1250059044,-1.5689564646,0.7044816874  
H,0,-3.1902164408,-0.9997164896,0.4901995769  
H,0,3.079061415,0.4846729561,1.3269164989  
O,0,3.2387948898,-1.0290382441,-0.9278403314  
C,0,4.5206696025,-0.643405073,-0.4018749053  
H,0,5.2537221792,-1.1482506461,-1.037634681  
H,0,4.6677141567,0.4435865288,-0.4654926783  
H,0,4.6462129726,-0.9844247708,0.6353596651

### Supporting References

1. <http://www.acdlabs.com>.
2. <http://www.stenutz.eu/conf/haasnoot.php>.
3. Karplus M (1963) Vicinal proton coupling in nuclear magnetic resonance *J Am Chem Soc* 85(18):2870–2871.
